# Supplementary material for: Fossil-informed biogeographic analysis suggests Eurasian regionalization in crown Squamata during the early Jurassic
Source: PeerJ. 2024 Apr 30;12:e17277. doi: 10.7717/peerj.17277 (PMC11067913; doi:10.7717/peerj.17277)
Supplement: Supplemental Information 1 — The first sheet contains the individual plate names and the major plate to which they were concatenated. The other sheets showed the raw data for each species and their regional assignments. [file peerj-12-17277-s001.xlsx]

## Sheet: Plates
PlateName	Major Plate		Key	Name	Single Letter Key
Aegean Sea	Eurasia		AF	Africa	A
Africa	Africa		AR	Arabia	R
Altiplano	South America		AU	Australia	U
Amur	Eurasia		CA	Caribbean	C
Anatolia	Eurasia		EU	Eurasia	E
Antarctica	Antarctica		IN	India	I
Arabia	Arabia		NAM	North America	N
Australia	Australia		SA	South America	S
Balmoral Reef	Pacific		SU	Sunda	D
Balmoral Reef	Pacific
Banda Sea	Sunda
Birds Head	Australia
Burma	Sunda
Caribbean	Caribbean
Caroline	Pacific
Cocos	Pacific
Conway Reef	Pacific
Easter	South America
Eurasia	Eurasia
Futuna	Australia
Galapagos	Pacific
India	India
Juan de Fuca	North America
Juan Fernandez	South America
Kermadec	Australia
Kermadec	Australia
Manus	Australia
Maoke	Australia
Mariana	Pacific
Molucca Sea	Sunda
Nazca	South America
New Hebrides	Pacific
Niuafo'ou	Australia
North America	North America
North Andes	South America
North Bismarck	Australia
Okhotsk	Eurasia
Okinawa	Eurasia
Pacific	Pacific
Panama	Caribbean
Philippine Sea	Pacific
Rivera	North America
Sandwich	South America
Scotia	South America
Shetland	Antarctica
Solomon Sea	Australia
Somalia	Africa
South America	South America
South Bismarck	Australia
Sunda	Sunda
Timor	Sunda
Tonga	Australia
Woodlark	Australia
Yangtze	Eurasia

## Sheet: 3 areas
Tonini	NAM	EUR	GON
Ablepharus bivittatus	0	1	0
Ablepharus budaki	0	1	1
Ablepharus chernovi	0	1	1
Ablepharus darvazi	0	1	0
Ablepharus deserti	0	1	0
Ablepharus grayanus	0	1	1
Ablepharus kitaibelii	0	1	0
Ablepharus lindbergi	0	1	0
Ablepharus pannonicus	0	1	1
Ablepharus rueppellii	0	1	1
Abronia anzuetoi	1	0	0
Abronia aurita	1	0	0
Abronia bogerti	1	0	0
Abronia campbelli	1	0	0
Abronia chiszari	1	0	0
Abronia deppii	1	0	0
Abronia fimbriata	1	0	0
Abronia frosti	1	0	0
Abronia fuscolabialis	1	0	0
Abronia gaiophantasma	1	0	0
Abronia graminea	1	0	0
Abronia leurolepis	1	0	0
Abronia lythrochila	1	0	0
Abronia martindelcampoi	1	0	0
Abronia matudai	1	0	0
Abronia meledona	1	0	0
Abronia mitchelli	1	0	0
Abronia mixteca	1	0	0
Abronia montecristoi	1	0	0
Abronia oaxacae	1	0	0
Abronia ochoterenai	1	0	0
Abronia ornelasi	1	0	0
Abronia ramirezi	1	0	0
Abronia reidi	1	0	0
Abronia salvadorensis	1	0	0
Abronia smithi	1	0	0
Abronia taeniata	1	0	0
Abronia vasconcelosii	1	0	0
Acanthocercus adramitanus	0	0	1
Acanthocercus annectens	0	0	1
Acanthocercus atricollis	0	0	1
Acanthocercus branchi	0	0	1
Acanthocercus cyanogaster	0	0	1
Acanthocercus guentherpetersi	0	0	1
Acanthocercus phillipsii	0	0	1
Acanthocercus yemensis	0	0	1
Acanthodactylus aegyptius	0	0	1
Acanthodactylus ahmaddisii	0	0	1
Acanthodactylus arabicus	0	0	1
Acanthodactylus aureus	0	0	1
Acanthodactylus bedriagai	0	0	1
Acanthodactylus beershebensis	0	0	1
Acanthodactylus blanci	0	0	1
Acanthodactylus blanfordii	0	1	1
Acanthodactylus boskianus	0	1	1
Acanthodactylus boueti	0	0	1
Acanthodactylus busacki	0	0	1
Acanthodactylus cantoris	0	1	1
Acanthodactylus dumerilii	0	1	1
Acanthodactylus erythrurus	0	1	1
Acanthodactylus felicis	0	0	1
Acanthodactylus gongrorhynchatus	0	0	1
Acanthodactylus grandis	0	1	1
Acanthodactylus guineensis	0	0	1
Acanthodactylus haasi	0	0	1
Acanthodactylus hardyi	0	1	1
Acanthodactylus harranensis	0	0	1
Acanthodactylus khamirensis	0	1	0
Acanthodactylus lineomaculatus	0	1	1
Acanthodactylus longipes	0	0	1
Acanthodactylus maculatus	0	1	1
Acanthodactylus masirae	0	0	1
Acanthodactylus micropholis	0	1	1
Acanthodactylus nilsoni	0	1	0
Acanthodactylus opheodurus	0	0	1
Acanthodactylus orientalis	0	0	1
Acanthodactylus pardalis	0	0	1
Acanthodactylus robustus	0	0	1
Acanthodactylus savignyi	0	1	1
Acanthodactylus schmidti	0	1	1
Acanthodactylus schreiberi	0	1	0
Acanthodactylus scutellatus	0	1	1
Acanthodactylus senegalensis	0	0	1
Acanthodactylus spinicauda	0	0	1
Acanthodactylus taghitensis	0	0	1
Acanthodactylus tilburyi	0	0	1
Acanthodactylus tristrami	0	0	1
Acanthodactylus yemenicus	0	0	1
Acanthophis antarcticus	0	0	1
Acanthophis hawkei	0	0	1
Acanthophis laevis	0	1	1
Acanthophis praelongus	0	0	1
Acanthophis pyrrhus	0	0	1
Acanthophis rugosus	0	1	1
Acanthophis wellsi	0	0	1
Acanthosaura armata	0	1	0
Acanthosaura bintangensis	0	1	0
Acanthosaura brachypoda	0	1	0
Acanthosaura capra	0	1	0
Acanthosaura cardamomensis	0	1	0
Acanthosaura coronata	0	1	0
Acanthosaura crucigera	0	1	0
Acanthosaura lepidogaster	0	1	1
Acanthosaura nataliae	0	1	0
Acanthosaura titiwangsaensis	0	1	0
Achalinus ater	0	1	0
Achalinus formosanus	0	1	0
Achalinus hainanus	0	1	0
Achalinus jinggangensis	0	1	0
Achalinus meiguensis	0	1	0
Achalinus niger	0	1	0
Achalinus rufescens	0	1	0
Achalinus spinalis	0	1	0
Achalinus werneri	0	1	0
Acontias aurantiacus	0	0	1
Acontias bicolor	0	0	1
Acontias breviceps	0	0	1
Acontias cregoi	0	0	1
Acontias gariepensis	0	0	1
Acontias gracilicauda	0	0	1
Acontias jappi	0	0	1
Acontias kgalagadi	0	0	1
Acontias lineatus	0	0	1
Acontias litoralis	0	0	1
Acontias meleagris	0	0	1
Acontias namaquensis	0	0	1
Acontias occidentalis	0	0	1
Acontias orientalis	0	0	1
Acontias percivali	0	0	1
Acontias plumbeus	0	0	1
Acontias poecilus	0	0	1
Acontias richardi	0	0	1
Acontias rieppeli	0	0	1
Acontias schmitzi	0	0	1
Acontias tristis	0	0	1
Acrantophis dumerili	0	0	1
Acrantophis madagascariensis	0	0	1
Acratosaura mentalis	0	0	1
Acratosaura spinosa	0	0	1
Acrochordus arafurae	0	0	1
Acrochordus granulatus	0	1	1
Acrochordus javanicus	0	1	0
Acutotyphlops banaorum	0	1	0
Acutotyphlops infralabialis	0	0	1
Acutotyphlops kunuaensis	0	0	1
Acutotyphlops solomonis	0	0	1
Acutotyphlops subocularis	0	0	1
Adelophis copei	1	0	0
Adelophis foxi	1	0	0
Adelphicos daryi	1	0	0
Adelphicos ibarrorum	1	0	0
Adelphicos latifasciatum	1	0	0
Adelphicos nigrilatum	1	0	0
Adelphicos quadrivirgatum	1	0	0
Adelphicos veraepacis	1	0	0
Adercosaurus vixadnexus	0	0	1
Adolfus africanus	0	0	1
Adolfus alleni	0	0	1
Adolfus jacksoni	0	0	1
Adolfus masavaensis	0	0	1
Aeluroglena cucullata	0	0	1
Aeluroscalabotes felinus	0	1	0
Afroablepharus africanus	0	0	1
Afroablepharus annobonensis	0	0	1
Afroablepharus duruarum	0	0	1
Afroablepharus maculicollis	0	0	1
Afroablepharus seydeli	0	0	1
Afroablepharus wahlbergi	0	0	1
Afroablepharus wilsoni	0	0	1
Afroedura africana	0	0	1
Afroedura amatolica	0	0	1
Afroedura bogerti	0	0	1
Afroedura broadleyi	0	0	1
Afroedura granitica	0	0	1
Afroedura haackei	0	0	1
Afroedura halli	0	0	1
Afroedura hawequensis	0	0	1
Afroedura karroica	0	0	1
Afroedura langi	0	0	1
Afroedura leoloensis	0	0	1
Afroedura loveridgei	0	0	1
Afroedura major	0	0	1
Afroedura maripi	0	0	1
Afroedura marleyi	0	0	1
Afroedura multiporis	0	0	1
Afroedura namaquensis	0	0	1
Afroedura nivaria	0	0	1
Afroedura pienaari	0	0	1
Afroedura pondolia	0	0	1
Afroedura pongola	0	0	1
Afroedura rondavelica	0	0	1
Afroedura rupestris	0	0	1
Afroedura tembulica	0	0	1
Afroedura tirasensis	0	0	1
Afroedura transvaalica	0	0	1
Afroedura waterbergensis	0	0	1
Afrogecko ansorgii	0	0	1
Afrogecko porphyreus	0	0	1
Afronatrix anoscopus	0	0	1
Afrotyphlops angeli	0	0	1
Afrotyphlops angolensis	0	0	1
Afrotyphlops anomalus	0	0	1
Afrotyphlops bibronii	0	0	1
Afrotyphlops blanfordii	0	0	1
Afrotyphlops brevis	0	0	1
Afrotyphlops congestus	0	0	1
Afrotyphlops decorosus	0	0	1
Afrotyphlops elegans	0	0	1
Afrotyphlops fornasinii	0	0	1
Afrotyphlops gierrai	0	0	1
Afrotyphlops kaimosae	0	0	1
Afrotyphlops liberiensis	0	0	1
Afrotyphlops lineolatus	0	0	1
Afrotyphlops manni	0	0	1
Afrotyphlops mucruso	0	0	1
Afrotyphlops nanus	0	0	1
Afrotyphlops nigrocandidus	0	0	1
Afrotyphlops obtusus	0	0	1
Afrotyphlops punctatus	0	0	1
Afrotyphlops rondoensis	0	0	1
Afrotyphlops schlegelii	0	0	1
Afrotyphlops schmidti	0	0	1
Afrotyphlops steinhausi	0	0	1
Afrotyphlops tanganicanus	0	0	1
Afrotyphlops usambaricus	0	0	1
Agama aculeata	0	0	1
Agama africana	0	0	1
Agama agama	0	0	1
Agama anchietae	0	0	1
Agama armata	0	0	1
Agama atra	0	0	1
Agama bocourti	0	0	1
Agama boensis	0	0	1
Agama bottegi	0	0	1
Agama boueti	0	0	1
Agama boulengeri	0	0	1
Agama caudospinosa	0	0	1
Agama cristata	0	0	1
Agama doriae	0	0	1
Agama etoshae	0	0	1
Agama finchi	0	0	1
Agama gracilimembris	0	0	1
Agama hartmanni	0	0	1
Agama hispida	0	0	1
Agama impalearis	0	1	1
Agama insularis	0	0	1
Agama kaimosae	0	0	1
Agama kirkii	0	0	1
Agama knobeli	0	0	1
Agama lanzai	0	0	1
Agama lebretoni	0	0	1
Agama lionotus	0	0	1
Agama lucyae	0	0	1
Agama montana	0	0	1
Agama mossambica	0	0	1
Agama mucosoensis	0	0	1
Agama mwanzae	0	0	1
Agama parafricana	0	0	1
Agama paragama	0	0	1
Agama persimilis	0	0	1
Agama planiceps	0	0	1
Agama robecchii	0	0	1
Agama rueppelli	0	0	1
Agama sankaranica	0	0	1
Agama somalica	0	0	1
Agama spinosa	0	0	1
Agama sylvana	0	0	1
Agama tassiliensis	0	0	1
Agama turuensis	0	0	1
Agama weidholzi	0	0	1
Agamodon anguliceps	0	0	1
Agamodon arabicus	0	0	1
Agamodon compressus	0	0	1
Agamura persica	0	1	1
Agkistrodon bilineatus	1	0	0
Agkistrodon contortrix	1	0	0
Agkistrodon howardgloydi	1	0	0
Agkistrodon piscivorus	1	0	0
Agkistrodon russeolus	1	0	0
Agkistrodon taylori	1	0	0
Ahaetulla dispar	0	0	1
Ahaetulla fasciolata	0	1	0
Ahaetulla fronticincta	0	1	1
Ahaetulla mycterizans	0	1	0
Ahaetulla nasuta	0	1	1
Ahaetulla perroteti	0	0	1
Ahaetulla prasina	0	1	1
Ahaetulla pulverulenta	0	0	1
Ailuronyx seychellensis	0	0	1
Ailuronyx tachyscopaeus	0	0	1
Ailuronyx trachygaster	0	0	1
Aipysurus apraefrontalis	0	0	1
Aipysurus duboisii	0	0	1
Aipysurus eydouxii	0	1	1
Aipysurus foliosquama	0	0	1
Aipysurus fuscus	0	1	1
Aipysurus laevis	0	1	1
Aipysurus mosaicus	0	0	1
Aipysurus tenuis	0	0	1
Alexandresaurus camacan	0	0	1
Algyroides fitzingeri	0	1	0
Algyroides marchi	0	1	0
Algyroides moreoticus	0	1	0
Algyroides nigropunctatus	0	1	0
Alinea berengerae	1	0	0
Alinea lanceolata	1	0	0
Alinea luciae	1	0	0
Alinea pergravis	1	0	0
Alluaudina bellyi	0	0	1
Alluaudina mocquardi	0	0	1
Alopoglossus angulatus	0	0	1
Alopoglossus atriventris	0	0	1
Alopoglossus buckleyi	0	0	1
Alopoglossus copii	0	0	1
Alopoglossus festae	0	0	1
Alopoglossus lehmanni	0	0	1
Alopoglossus viridiceps	0	0	1
Alsophis antiguae	1	0	0
Alsophis antillensis	1	0	0
Alsophis danforthi	1	0	0
Alsophis manselli	1	0	0
Alsophis rijgersmaei	1	0	0
Alsophis rufiventris	1	0	0
Alsophis sajdaki	1	0	0
Alsophis sanctonum	1	0	0
Alsophis sibonius	1	0	0
Alsophylax laevis	0	1	0
Alsophylax loricatus	0	1	0
Alsophylax pipiens	0	1	0
Alsophylax przewalskii	0	1	0
Alsophylax szczerbaki	0	1	0
Alsophylax tadjikiensis	0	1	0
Altiphylax baturensis	0	1	1
Altiphylax levitoni	0	1	0
Altiphylax mintoni	0	1	0
Altiphylax stoliczkai	0	1	1
Altiphylax tokobajevi	0	1	0
Altiphylax yarkandensis	0	1	0
Amalosia jacovae	0	0	1
Amalosia lesueurii	0	0	1
Amalosia obscura	0	0	1
Amalosia rhombifer	0	0	1
Amapasaurus tetradactylus	0	0	1
Amastridium sapperi	1	0	0
Amastridium veliferum	1	0	0
Amblyodipsas concolor	0	0	1
Amblyodipsas dimidiata	0	0	1
Amblyodipsas katangensis	0	0	1
Amblyodipsas microphthalma	0	0	1
Amblyodipsas polylepis	0	0	1
Amblyodipsas rodhaini	0	0	1
Amblyodipsas teitana	0	0	1
Amblyodipsas unicolor	0	0	1
Amblyodipsas ventrimaculata	0	0	1
Amblyrhynchus cristatus	0	0	1
Ameiva aggerecusans	0	0	1
Ameiva ameiva	1	0	1
Ameiva atrata	1	0	0
Ameiva atrigularis	1	0	1
Ameiva auberi	1	0	0
Ameiva bifrontata	1	0	1
Ameiva chrysolaema	1	0	0
Ameiva cineracea	1	0	0
Ameiva concolor	0	0	1
Ameiva corax	1	0	0
Ameiva corvina	1	0	0
Ameiva dorsalis	1	0	0
Ameiva erythrocephala	1	0	0
Ameiva exsul	1	0	0
Ameiva fuscata	1	0	0
Ameiva griswoldi	1	0	0
Ameiva jacuba	0	0	1
Ameiva lineolata	1	0	0
Ameiva major	1	0	0
Ameiva maynardi	1	0	0
Ameiva nodam	0	0	1
Ameiva pantherina	0	0	1
Ameiva parecis	0	0	1
Ameiva plei	1	0	0
Ameiva pluvianotata	1	0	0
Ameiva polops	1	0	0
Ameiva praesignis	0	0	1
Ameiva provitaae	0	0	1
Ameiva taeniura	1	0	0
Ameiva wetmorei	1	0	0
Ameivula abaetensis	0	0	1
Ameivula abalosi	0	0	1
Ameivula cipoensis	0	0	1
Ameivula confusioniba	0	0	1
Ameivula cyanura	0	0	1
Ameivula jalapensis	0	0	1
Ameivula littoralis	0	0	1
Ameivula mumbuca	0	0	1
Ameivula nativo	0	0	1
Ameivula nigrigula	0	0	1
Ameivula ocellifera	0	0	1
Ameivula pyrrhogularis	0	0	1
Ameivula venetacauda	0	0	1
Ameivula xacriaba	0	0	1
Amerotyphlops amoipira	0	0	1
Amerotyphlops brongersmianus	1	0	1
Amerotyphlops costaricensis	1	0	0
Amerotyphlops lehneri	0	0	1
Amerotyphlops microstomus	1	0	0
Amerotyphlops minuisquamus	0	0	1
Amerotyphlops paucisquamus	0	0	1
Amerotyphlops reticulatus	0	0	1
Amerotyphlops stadelmani	1	0	0
Amerotyphlops tasymicris	1	0	0
Amerotyphlops tenuis	1	0	0
Amerotyphlops trinitatus	1	0	0
Amerotyphlops tycherus	1	0	0
Amerotyphlops yonenagae	0	0	1
Amnesteophis melanauchen	0	0	1
Amphibolurus muricatus	0	0	1
Amphibolurus norrisi	0	0	1
Amphiesma stolatum	0	1	1
Amphiesmoides ornaticeps	0	1	0
Amphiglossus alluaudi	0	0	1
Amphiglossus andranovahensis	0	0	1
Amphiglossus anosyensis	0	0	1
Amphiglossus ardouini	0	0	1
Amphiglossus astrolabi	0	0	1
Amphiglossus crenni	0	0	1
Amphiglossus decaryi	0	0	1
Amphiglossus elongatus	0	0	1
Amphiglossus frontoparietalis	0	0	1
Amphiglossus gastrostictus	0	0	1
Amphiglossus johannae	0	0	1
Amphiglossus macrocercus	0	0	1
Amphiglossus mandady	0	0	1
Amphiglossus mandokava	0	0	1
Amphiglossus melanurus	0	0	1
Amphiglossus meva	0	0	1
Amphiglossus ornaticeps	0	0	1
Amphiglossus punctatus	0	0	1
Amphiglossus reticulatus	0	0	1
Amphiglossus spilostichus	0	0	1
Amphiglossus splendidus	0	0	1
Amphiglossus stylus	0	0	1
Amphiglossus tanysoma	0	0	1
Amphiglossus tsaratananensis	0	0	1
Amphiglossus valhallae	0	0	1
Amphisbaena absaberi	0	0	1
Amphisbaena acrobeles	0	0	1
Amphisbaena alba	1	0	1
Amphisbaena albocingulata	0	0	1
Amphisbaena amazonica	0	0	1
Amphisbaena anaemariae	0	0	1
Amphisbaena angustifrons	0	0	1
Amphisbaena anomala	0	0	1
Amphisbaena arda	0	0	1
Amphisbaena arenaria	0	0	1
Amphisbaena bahiana	0	0	1
Amphisbaena bakeri	1	0	0
Amphisbaena barbouri	1	0	0
Amphisbaena bassleri	0	0	1
Amphisbaena bedai	0	0	1
Amphisbaena bilabialatus	0	0	1
Amphisbaena bolivica	0	0	1
Amphisbaena borelli	0	0	1
Amphisbaena brasiliana	0	0	1
Amphisbaena brevis	0	0	1
Amphisbaena caeca	1	0	0
Amphisbaena caiari	0	0	1
Amphisbaena camura	0	0	1
Amphisbaena carlgansi	1	0	0
Amphisbaena carli	0	0	1
Amphisbaena carvalhoi	0	0	1
Amphisbaena caudalis	1	0	0
Amphisbaena cayemite	1	0	0
Amphisbaena cegei	0	0	1
Amphisbaena cerradensis	0	0	1
Amphisbaena crisae	0	0	1
Amphisbaena cubana	1	0	0
Amphisbaena cuiabana	0	0	1
Amphisbaena cunhai	0	0	1
Amphisbaena darwini	0	0	1
Amphisbaena dubia	0	0	1
Amphisbaena fenestrata	1	0	0
Amphisbaena frontalis	0	0	1
Amphisbaena fuliginosa	1	0	1
Amphisbaena gonavensis	1	0	0
Amphisbaena gracilis	0	0	1
Amphisbaena hastata	0	0	1
Amphisbaena heathi	0	0	1
Amphisbaena heterozonata	0	0	1
Amphisbaena hiata	0	0	1
Amphisbaena hogei	0	0	1
Amphisbaena hyporissor	1	0	0
Amphisbaena ibijara	0	0	1
Amphisbaena ignatiana	0	0	1
Amphisbaena infraorbitale	0	0	1
Amphisbaena innocens	1	0	0
Amphisbaena kingii	0	0	1
Amphisbaena kisteumacheri	0	0	1
Amphisbaena kraoh	0	0	1
Amphisbaena leali	1	0	0
Amphisbaena leeseri	0	0	1
Amphisbaena leucocephala	0	0	1
Amphisbaena littoralis	0	0	1
Amphisbaena lumbricalis	0	0	1
Amphisbaena manni	1	0	0
Amphisbaena maranhensis	0	0	1
Amphisbaena maximus	0	0	1
Amphisbaena medemi	0	0	1
Amphisbaena mensae	0	0	1
Amphisbaena mertensii	0	0	1
Amphisbaena microcephalum	0	0	1
Amphisbaena miringoera	0	0	1
Amphisbaena mitchelli	0	0	1
Amphisbaena munoai	0	0	1
Amphisbaena myersi	0	0	1
Amphisbaena neglecta	0	0	1
Amphisbaena nigricauda	0	0	1
Amphisbaena occidentalis	0	0	1
Amphisbaena octostegum	0	0	1
Amphisbaena pericensis	0	0	1
Amphisbaena persephone	0	0	1
Amphisbaena plumbea	0	0	1
Amphisbaena polygrammica	0	0	1
Amphisbaena polystegum	0	0	1
Amphisbaena pretrei	0	0	1
Amphisbaena prunicolor	0	0	1
Amphisbaena ridleyi	0	0	1
Amphisbaena roberti	0	0	1
Amphisbaena rozei	0	0	1
Amphisbaena sanctaeritae	0	0	1
Amphisbaena saxosa	0	0	1
Amphisbaena schmidti	1	0	0
Amphisbaena scutigerum	0	0	1
Amphisbaena silvestrii	0	0	1
Amphisbaena slateri	0	0	1
Amphisbaena slevini	0	0	1
Amphisbaena spurelli	0	0	1
Amphisbaena steindachneri	0	0	1
Amphisbaena stejnegeri	0	0	1
Amphisbaena supernumeraria	0	0	1
Amphisbaena talisiae	0	0	1
Amphisbaena townsendi	0	0	1
Amphisbaena trachura	0	0	1
Amphisbaena tragorrhectes	0	0	1
Amphisbaena uroxena	0	0	1
Amphisbaena vanzolinii	0	0	1
Amphisbaena varia	1	0	1
Amphisbaena vermicularis	0	0	1
Amphisbaena wiedi	0	0	1
Amphisbaena wuchereri	0	0	1
Amphisbaena xera	1	0	0
Amplorhinus multimaculatus	0	0	1
Anadia altaserrania	0	0	1
Anadia antioquensis	0	0	1
Anadia bitaeniata	0	0	1
Anadia blakei	0	0	1
Anadia bogotensis	0	0	1
Anadia brevifrontalis	0	0	1
Anadia bumanguesa	0	0	1
Anadia escalerae	0	0	1
Anadia hobarti	0	0	1
Anadia marmorata	0	0	1
Anadia mcdiarmidi	0	0	1
Anadia ocellata	1	0	1
Anadia pamplonensis	0	0	1
Anadia pariaensis	1	0	0
Anadia petersi	0	0	1
Anadia pulchella	0	0	1
Anadia rhombifera	0	0	1
Anadia steyeri	0	0	1
Anadia vittata	1	0	1
Anatololacerta anatolica	0	1	0
Anatololacerta budaki	0	1	0
Anatololacerta danfordi	0	1	0
Anatololacerta pelasgiana	0	1	0
Ancylocranium barkeri	0	0	1
Ancylocranium ionidesi	0	0	1
Ancylocranium somalicum	0	0	1
Androngo trivittatus	0	0	1
Anelytropsis papillosus	1	0	0
Anepischetosia maccoyi	0	0	1
Anguis cephallonica	0	1	0
Anguis colchica	0	1	0
Anguis fragilis	0	1	0
Anguis graeca	0	1	0
Anguis incomptus	1	0	0
Anguis veronensis	0	1	0
Anilios affinis	0	0	1
Anilios ammodytes	0	0	1
Anilios aspinus	0	0	1
Anilios australis	0	0	1
Anilios batillus	0	0	1
Anilios bicolor	0	0	1
Anilios bituberculatus	0	0	1
Anilios broomi	0	0	1
Anilios centralis	0	0	1
Anilios chamodracaena	0	0	1
Anilios diversus	0	0	1
Anilios endoterus	0	0	1
Anilios erycinus	0	0	1
Anilios ganei	0	0	1
Anilios grypus	0	0	1
Anilios guentheri	0	0	1
Anilios hamatus	0	0	1
Anilios howi	0	0	1
Anilios kimberleyensis	0	0	1
Anilios leptosomus	0	0	1
Anilios leucoproctus	0	0	1
Anilios ligatus	0	0	1
Anilios longissimus	0	0	1
Anilios margaretae	0	0	1
Anilios micrommus	0	0	1
Anilios minimus	0	0	1
Anilios nema	0	0	1
Anilios nigrescens	0	0	1
Anilios nigricaudus	0	0	1
Anilios nigroterminatus	0	0	1
Anilios pilbarensis	0	0	1
Anilios pinguis	0	0	1
Anilios polygrammicus	0	0	1
Anilios proximus	0	0	1
Anilios robertsi	0	0	1
Anilios silvia	0	0	1
Anilios splendidus	0	0	1
Anilios torresianus	0	0	1
Anilios tovelli	0	0	1
Anilios troglodytes	0	0	1
Anilios unguirostris	0	0	1
Anilios waitii	0	0	1
Anilios wiedii	0	0	1
Anilios yampiensis	0	0	1
Anilios yirrikalae	0	0	1
Anilius scytale	0	0	1
Anisolepis grilli	0	0	1
Anisolepis longicauda	0	0	1
Anisolepis undulatus	0	0	1
Anniella alexanderae	1	0	0
Anniella campi	1	0	0
Anniella geronimensis	1	0	0
Anniella grinnelli	1	0	0
Anniella pulchra	1	0	0
Anniella stebbinsi	1	0	0
Anolis acutus	1	0	0
Anolis aeneus	1	0	1
Anolis aequatorialis	0	0	1
Anolis agassizi	0	0	1
Anolis agueroi	1	0	0
Anolis ahli	1	0	0
Anolis alayoni	1	0	0
Anolis alfaroi	1	0	0
Anolis aliniger	1	0	0
Anolis allisoni	1	0	0
Anolis allogus	1	0	0
Anolis altae	1	0	0
Anolis altavelensis	1	0	0
Anolis altitudinalis	1	0	0
Anolis alumina	1	0	0
Anolis alutaceus	1	0	0
Anolis alvarezdeltoroi	1	0	0
Anolis amplisquamosus	1	0	0
Anolis anatoloros	0	0	1
Anolis anchicayae	0	0	1
Anolis anfiloquioi	1	0	0
Anolis angusticeps	1	0	0
Anolis anisolepis	1	0	0
Anolis annectens	0	0	1
Anolis anoriensis	0	0	1
Anolis antioquiae	0	0	1
Anolis antonii	0	0	1
Anolis apletophallus	1	0	1
Anolis apollinaris	0	0	1
Anolis aquaticus	1	0	0
Anolis argenteolus	1	0	0
Anolis argillaceus	1	0	0
Anolis armouri	1	0	0
Anolis auratus	1	0	1
Anolis bahorucoensis	1	0	0
Anolis baleatus	1	0	0
Anolis baracoae	1	0	0
Anolis barahonae	1	0	0
Anolis barbatus	1	0	0
Anolis barbouri	1	0	0
Anolis barkeri	1	0	0
Anolis bartschi	1	0	0
Anolis beckeri	1	0	0
Anolis bellipeniculus	0	0	1
Anolis benedikti	1	0	0
Anolis bicaorum	1	0	0
Anolis bimaculatus	1	0	0
Anolis binotatus	0	0	1
Anolis biporcatus	1	0	1
Anolis birama	1	0	0
Anolis bitectus	0	0	1
Anolis blanquillanus	1	0	0
Anolis boettgeri	0	0	1
Anolis bombiceps	0	0	1
Anolis bonairensis	1	0	1
Anolis boulengerianus	1	0	0
Anolis brasiliensis	0	0	1
Anolis bremeri	1	0	0
Anolis breslini	1	0	0
Anolis brevirostris	1	0	0
Anolis brunneus	1	0	0
Anolis calimae	0	0	1
Anolis campbelli	1	0	0
Anolis capito	1	0	1
Anolis caquetae	0	0	1
Anolis carlliebi	1	0	0
Anolis carlostoddi	0	0	1
Anolis carolinensis	1	0	0
Anolis carpenteri	1	0	0
Anolis casildae	1	0	0
Anolis caudalis	1	0	0
Anolis centralis	1	0	0
Anolis chamaeleonides	1	0	0
Anolis charlesmyersi	1	0	0
Anolis chloris	1	0	1
Anolis chlorocyanus	1	0	0
Anolis chocorum	1	0	1
Anolis christophei	1	0	0
Anolis chrysolepis	1	0	1
Anolis chrysops	1	0	0
Anolis clivicola	1	0	0
Anolis cobanensis	1	0	0
Anolis coelestinus	1	0	0
Anolis compressicauda	1	0	0
Anolis concolor	1	0	0
Anolis confusus	1	0	0
Anolis conspersus	1	0	0
Anolis cooki	1	0	0
Anolis crassulus	1	0	0
Anolis cristatellus	1	0	0
Anolis cristifer	1	0	0
Anolis cryptolimifrons	1	0	0
Anolis cupeyalensis	1	0	0
Anolis cupreus	1	0	0
Anolis cuprinus	1	0	0
Anolis cuscoensis	0	0	1
Anolis cusuco	1	0	0
Anolis cuvieri	1	0	0
Anolis cyanopleurus	1	0	0
Anolis cybotes	1	0	0
Anolis cymbops	1	0	0
Anolis damulus	1	0	0
Anolis danieli	0	0	1
Anolis darlingtoni	1	0	0
Anolis datzorum	1	0	0
Anolis delafuentei	1	0	0
Anolis deltae	1	0	1
Anolis desechensis	1	0	0
Anolis desiradei	1	0	0
Anolis dissimilis	0	0	1
Anolis distichus	1	0	0
Anolis dolichocephalus	1	0	0
Anolis dollfusianus	1	0	0
Anolis duellmani	1	0	0
Anolis dunni	1	0	0
Anolis eewi	0	0	1
Anolis equestris	1	0	0
Anolis ernestwilliamsi	1	0	0
Anolis etheridgei	1	0	0
Anolis eugenegrahami	1	0	0
Anolis eulaemus	0	0	1
Anolis euskalerriari	0	0	1
Anolis evermanni	1	0	0
Anolis extremus	1	0	1
Anolis fairchildi	1	0	0
Anolis fasciatus	0	0	1
Anolis ferreus	1	0	0
Anolis festae	0	0	1
Anolis fitchi	0	0	1
Anolis forresti	1	0	0
Anolis fortunensis	1	0	0
Anolis fowleri	1	0	0
Anolis fraseri	0	0	1
Anolis frenatus	1	0	1
Anolis fugitivus	1	0	0
Anolis fungosus	1	0	0
Anolis fuscoauratus	1	0	1
Anolis gadovii	1	0	0
Anolis gaigei	1	0	1
Anolis garmani	1	0	0
Anolis garridoi	1	0	0
Anolis gemmosus	0	0	1
Anolis gibbiceps	1	0	1
Anolis ginaelisae	1	0	0
Anolis gingivinus	1	0	0
Anolis gorgonae	0	0	1
Anolis gracilipes	1	0	1
Anolis grahami	1	0	0
Anolis granuliceps	0	0	1
Anolis griseus	1	0	0
Anolis gruuo	1	0	0
Anolis guafe	1	0	0
Anolis guamuhaya	1	0	0
Anolis guazuma	1	0	0
Anolis gundlachi	1	0	0
Anolis haetianus	1	0	0
Anolis haguei	1	0	0
Anolis hendersoni	1	0	0
Anolis heterodermus	0	0	1
Anolis hobartsmithi	1	0	0
Anolis homolechis	1	0	0
Anolis huilae	0	0	1
Anolis humilis	1	0	1
Anolis ibague	0	0	1
Anolis ibanezi	1	0	0
Anolis imias	1	0	0
Anolis immaculogularis	1	0	0
Anolis impetigosus	0	0	1
Anolis incredulus	1	0	0
Anolis inderenae	0	0	1
Anolis inexpectatus	1	0	0
Anolis insignis	1	0	1
Anolis insolitus	1	0	0
Anolis intermedius	1	0	0
Anolis isolepis	1	0	0
Anolis jacare	0	0	1
Anolis johnmeyeri	1	0	0
Anolis juangundlachi	1	0	0
Anolis jubar	1	0	0
Anolis kahouannensis	1	0	0
Anolis kemptoni	1	0	0
Anolis koopmani	1	0	0
Anolis kreutzi	1	0	0
Anolis krugi	1	0	0
Anolis kunayalae	1	0	0
Anolis laevis	0	0	1
Anolis laeviventris	1	0	0
Anolis lamari	0	0	1
Anolis latifrons	1	0	1
Anolis leachii	1	0	0
Anolis lemniscatus	0	0	1
Anolis lemurinus	1	0	1
Anolis limifrons	1	0	1
Anolis limon	0	0	1
Anolis lineatopus	1	0	0
Anolis lineatus	1	0	1
Anolis liogaster	1	0	0
Anolis lionotus	1	0	1
Anolis litoralis	1	0	0
Anolis lividus	1	0	0
Anolis longiceps	1	0	0
Anolis longitibialis	1	0	0
Anolis loveridgei	1	0	0
Anolis loysiana	1	0	0
Anolis luciae	1	0	1
Anolis lucius	1	0	0
Anolis luteogularis	1	0	0
Anolis luteosignifer	1	0	0
Anolis lynchi	0	0	1
Anolis lyra	0	0	1
Anolis macilentus	1	0	0
Anolis macrinii	1	0	0
Anolis macrolepis	0	0	1
Anolis macrophallus	1	0	0
Anolis maculigula	0	0	1
Anolis maculiventris	1	0	1
Anolis magnaphallus	1	0	0
Anolis marcanoi	1	0	0
Anolis mariarum	0	0	1
Anolis marmoratus	1	0	0
Anolis marron	1	0	0
Anolis matudai	1	0	0
Anolis maynardi	1	0	0
Anolis medemi	0	0	1
Anolis megalopithecus	0	0	1
Anolis megapholidotus	1	0	0
Anolis menta	0	0	1
Anolis meridionalis	0	0	1
Anolis mestrei	1	0	0
Anolis microlepidotus	1	0	0
Anolis microlepis	1	0	0
Anolis microtus	1	0	0
Anolis milleri	1	0	0
Anolis mirus	0	0	1
Anolis monensis	1	0	0
Anolis monteverde	1	0	0
Anolis monticola	1	0	0
Anolis morazani	1	0	0
Anolis muralla	1	0	0
Anolis nasofrontalis	0	0	1
Anolis naufragus	1	0	0
Anolis neblininus	0	0	1
Anolis nebuloides	1	0	0
Anolis nebulosus	1	0	0
Anolis nelsoni	1	0	0
Anolis nicefori	0	0	1
Anolis nietoi	1	0	0
Anolis nigrolineatus	0	0	1
Anolis noblei	1	0	0
Anolis notopholis	0	0	1
Anolis nubilus	1	0	0
Anolis occultus	1	0	0
Anolis ocelloscapularis	1	0	0
Anolis oculatus	1	0	0
Anolis oligaspis	1	0	0
Anolis olssoni	1	0	0
Anolis omiltemanus	1	0	0
Anolis onca	1	0	1
Anolis opalinus	1	0	0
Anolis ophiolepis	1	0	0
Anolis oporinus	1	0	0
Anolis orcesi	0	0	1
Anolis ordinatus	1	0	0
Anolis ortonii	0	0	1
Anolis osa	1	0	0
Anolis otongae	0	0	1
Anolis oxylophus	1	0	0
Anolis pachypus	1	0	0
Anolis paravertebralis	0	0	1
Anolis parilis	0	0	1
Anolis parvicirculatus	1	0	0
Anolis paternus	1	0	0
Anolis pentaprion	1	0	1
Anolis peraccae	0	0	1
Anolis petersii	1	0	0
Anolis peucephilus	1	0	0
Anolis philopunctatus	0	0	1
Anolis phyllorhinus	0	0	1
Anolis pigmaequestris	1	0	0
Anolis pijolense	1	0	0
Anolis pinchoti	1	0	0
Anolis placidus	1	0	0
Anolis planiceps	1	0	1
Anolis podocarpus	0	0	1
Anolis poecilopus	1	0	1
Anolis poei	0	0	1
Anolis pogus	1	0	0
Anolis polylepis	1	0	0
Anolis poncensis	1	0	0
Anolis porcatus	1	0	0
Anolis porcus	1	0	0
Anolis princeps	0	0	1
Anolis proboscis	0	0	1
Anolis propinquus	0	0	1
Anolis pseudokemptoni	1	0	0
Anolis pseudopachypus	1	0	0
Anolis pseudotigrinus	0	0	1
Anolis pulchellus	1	0	0
Anolis pumilus	1	0	0
Anolis punctatus	0	0	1
Anolis purpurescens	0	0	1
Anolis purpurgularis	1	0	0
Anolis pygmaeus	1	0	0
Anolis quadriocellifer	1	0	0
Anolis quaggulus	1	0	0
Anolis quercorum	1	0	0
Anolis radulinus	0	0	1
Anolis reconditus	1	0	0
Anolis rejectus	1	0	0
Anolis rhombifer	1	0	0
Anolis richardii	1	0	0
Anolis ricordii	1	0	0
Anolis rimarum	1	0	0
Anolis rivalis	0	0	1
Anolis roatanensis	1	0	0
Anolis rodriguezi	1	0	0
Anolis roosevelti	1	0	0
Anolis roquet	1	0	0
Anolis rubiginosus	1	0	0
Anolis rubribarbaris	1	0	0
Anolis rubribarbus	1	0	0
Anolis ruibali	1	0	0
Anolis ruizii	0	0	1
Anolis rupinae	1	0	0
Anolis sabanus	1	0	0
Anolis sacamecatensis	1	0	0
Anolis sagrei	1	0	0
Anolis salvini	1	0	0
Anolis santamartae	0	0	1
Anolis scapularis	0	0	1
Anolis schiedii	1	0	0
Anolis schwartzi	1	0	0
Anolis scriptus	1	0	0
Anolis scypheus	0	0	1
Anolis semilineatus	1	0	0
Anolis sericeus	1	0	0
Anolis serranoi	1	0	1
Anolis sheplani	1	0	0
Anolis shrevei	1	0	0
Anolis sierramaestrae	1	0	0
Anolis singularis	1	0	0
Anolis smallwoodi	1	0	0
Anolis smaragdinus	1	0	0
Anolis sminthus	1	0	0
Anolis soinii	0	0	1
Anolis solitarius	0	0	1
Anolis spectrum	1	0	0
Anolis squamulatus	0	0	1
Anolis stevepoei	1	0	0
Anolis strahmi	1	0	0
Anolis stratulus	1	0	0
Anolis subocularis	1	0	0
Anolis sulcifrons	0	0	1
Anolis tandai	0	0	1
Anolis taylori	1	0	0
Anolis tenorioensis	1	0	0
Anolis terraealtae	1	0	0
Anolis terueli	1	0	0
Anolis tetarii	0	0	1
Anolis tigrinus	1	0	1
Anolis toldo	1	0	0
Anolis tolimensis	0	0	1
Anolis townsendi	1	0	0
Anolis trachyderma	0	0	1
Anolis transversalis	0	0	1
Anolis trinitatis	1	0	0
Anolis tropidogaster	1	0	1
Anolis tropidolepis	1	0	0
Anolis tropidonotus	1	0	0
Anolis umbrivagus	0	0	1
Anolis uniformis	1	0	0
Anolis unilobatus	1	0	0
Anolis utilensis	1	0	0
Anolis valencienni	1	0	0
Anolis vanidicus	1	0	0
Anolis vanzolinii	0	0	1
Anolis vaupesianus	0	0	1
Anolis ventrimaculatus	0	0	1
Anolis vermiculatus	1	0	0
Anolis vescus	1	0	0
Anolis vicarius	0	0	1
Anolis villai	1	0	0
Anolis vittigerus	1	0	1
Anolis wampuensis	1	0	0
Anolis wattsi	1	0	0
Anolis websteri	1	0	0
Anolis wellbornae	1	0	0
Anolis wermuthi	1	0	0
Anolis whitemani	1	0	0
Anolis williamsii	0	0	1
Anolis williamsmittermeierorum	0	0	1
Anolis woodi	1	0	0
Anolis yoroensis	1	0	0
Anolis zapotecorum	1	0	0
Anolis zeus	1	0	0
Anomalepis aspinosus	0	0	1
Anomalepis colombia	0	0	1
Anomalepis flavapices	0	0	1
Anomalepis mexicanus	1	0	0
Anomalopus brevicollis	0	0	1
Anomalopus gowi	0	0	1
Anomalopus leuckartii	0	0	1
Anomalopus mackayi	0	0	1
Anomalopus pluto	0	0	1
Anomalopus swansoni	0	0	1
Anomalopus verreauxi	0	0	1
Anomochilus leonardi	0	1	0
Anomochilus monticola	0	1	0
Anomochilus weberi	0	1	0
Anoplohydrus aemulans	0	1	0
Anotosaura collaris	0	0	1
Anotosaura vanzolinia	0	0	1
Antaresia childreni	0	0	1
Antaresia maculosa	0	0	1
Antaresia perthensis	0	0	1
Antaresia stimsoni	0	0	1
Aparallactus capensis	0	0	1
Aparallactus guentheri	0	0	1
Aparallactus jacksonii	0	0	1
Aparallactus lineatus	0	0	1
Aparallactus lunulatus	0	0	1
Aparallactus modestus	0	0	1
Aparallactus moeruensis	0	0	1
Aparallactus niger	0	0	1
Aparallactus nigriceps	0	0	1
Aparallactus turneri	0	0	1
Aparallactus werneri	0	0	1
Apathya cappadocica	0	1	1
Apathya yassujica	0	1	0
Aphaniotis acutirostris	0	1	0
Aphaniotis fusca	0	1	0
Aphaniotis ornata	0	1	0
Aplopeltura boa	0	1	0
Apostolepis albicollaris	0	0	1
Apostolepis ambiniger	0	0	1
Apostolepis ammodites	0	0	1
Apostolepis arenaria	0	0	1
Apostolepis assimilis	0	0	1
Apostolepis breviceps	0	0	1
Apostolepis cearensis	0	0	1
Apostolepis cerradoensis	0	0	1
Apostolepis christineae	0	0	1
Apostolepis dimidiata	0	0	1
Apostolepis dorbignyi	0	0	1
Apostolepis flavotorquata	0	0	1
Apostolepis gaboi	0	0	1
Apostolepis goiasensis	0	0	1
Apostolepis intermedia	0	0	1
Apostolepis longicaudata	0	0	1
Apostolepis multicincta	0	0	1
Apostolepis nelsonjorgei	0	0	1
Apostolepis niceforoi	0	0	1
Apostolepis nigrolineata	0	0	1
Apostolepis nigroterminata	0	0	1
Apostolepis parassimilis	0	0	1
Apostolepis phillipsae	0	0	1
Apostolepis polylepis	0	0	1
Apostolepis pymi	0	0	1
Apostolepis quirogai	0	0	1
Apostolepis serrana	0	0	1
Apostolepis striata	0	0	1
Apostolepis tenuis	0	0	1
Apostolepis vittata	0	0	1
Aprasia aurita	0	0	1
Aprasia clairae	0	0	1
Aprasia haroldi	0	0	1
Aprasia inaurita	0	0	1
Aprasia litorea	0	0	1
Aprasia parapulchella	0	0	1
Aprasia picturata	0	0	1
Aprasia pseudopulchella	0	0	1
Aprasia pulchella	0	0	1
Aprasia repens	0	1	1
Aprasia rostrata	0	0	1
Aprasia smithi	0	0	1
Aprasia striolata	0	0	1
Aprosdoketophis andreonei	0	0	1
Archaeolacerta bedriagae	0	1	0
Archaius tigris	0	0	1
Archelaphe bella	0	1	1
Argyrogena fasciolata	0	1	1
Argyrogena vittacaudata	0	1	0
Argyrophis bothriorhynchus	0	0	1
Argyrophis diardii	0	1	1
Argyrophis fuscus	0	1	0
Argyrophis giadinhensis	0	1	0
Argyrophis hypsobothrius	0	1	0
Argyrophis klemmeri	0	1	0
Argyrophis koshunensis	0	1	0
Argyrophis muelleri	0	1	0
Argyrophis oatesii	0	1	0
Argyrophis roxaneae	0	1	0
Argyrophis siamensis	0	1	0
Argyrophis trangensis	0	1	0
Aristelliger barbouri	1	0	0
Aristelliger cochranae	1	0	0
Aristelliger expectatus	1	0	0
Aristelliger georgeensis	1	0	0
Aristelliger hechti	1	0	0
Aristelliger lar	1	0	0
Aristelliger praesignis	1	0	0
Aristelliger reyesi	1	0	0
Arizona elegans	1	0	0
Arrhyton ainictum	1	0	0
Arrhyton dolichura	1	0	0
Arrhyton procerum	1	0	0
Arrhyton redimitum	1	0	0
Arrhyton supernum	1	0	0
Arrhyton taeniatum	1	0	0
Arrhyton tanyplectum	1	0	0
Arrhyton vittatum	1	0	0
Arthrosaura guianensis	0	0	1
Arthrosaura hoogmoedi	0	0	1
Arthrosaura kockii	0	0	1
Arthrosaura montigena	0	0	1
Arthrosaura reticulata	0	0	1
Arthrosaura synaptolepis	0	0	1
Arthrosaura testigensis	0	0	1
Arthrosaura tyleri	0	0	1
Arthrosaura versteegii	0	0	1
Asaccus andersoni	0	1	0
Asaccus barani	0	0	1
Asaccus caudivolvulus	0	0	1
Asaccus elisae	0	1	1
Asaccus gallagheri	0	0	1
Asaccus granularis	0	1	0
Asaccus griseonotus	0	1	1
Asaccus iranicus	0	0	1
Asaccus kermanshahensis	0	1	0
Asaccus kurdistanensis	0	1	0
Asaccus montanus	0	0	1
Asaccus nasrullahi	0	1	0
Asaccus platyrhynchus	0	0	1
Asaccus saffinae	0	1	0
Asaccus tangestanensis	0	1	1
Asaccus zagrosicus	0	1	0
Aspidelaps lubricus	0	0	1
Aspidelaps scutatus	0	0	1
Aspidites melanocephalus	0	0	1
Aspidites ramsayi	0	0	1
Aspidomorphus lineaticollis	0	0	1
Aspidomorphus muelleri	0	1	1
Aspidomorphus schlegelii	0	0	1
Aspidoscelis angusticeps	1	0	0
Aspidoscelis burti	1	0	0
Aspidoscelis calidipes	1	0	0
Aspidoscelis ceralbensis	1	0	0
Aspidoscelis communis	1	0	0
Aspidoscelis costata	1	0	0
Aspidoscelis cozumelae	1	0	0
Aspidoscelis danheimae	1	0	0
Aspidoscelis deppei	1	0	0
Aspidoscelis exsanguis	1	0	0
Aspidoscelis flagellicauda	1	0	0
Aspidoscelis gularis	1	0	0
Aspidoscelis guttata	1	0	0
Aspidoscelis hyperythra	1	0	0
Aspidoscelis inornata	1	0	0
Aspidoscelis labialis	1	0	0
Aspidoscelis laredoensis	1	0	0
Aspidoscelis lineattissima	1	0	0
Aspidoscelis marmorata	1	0	0
Aspidoscelis maslini	1	0	0
Aspidoscelis maxima	1	0	0
Aspidoscelis mexicana	1	0	0
Aspidoscelis motaguae	1	0	0
Aspidoscelis neomexicana	1	0	0
Aspidoscelis neotesselata	1	0	0
Aspidoscelis opatae	1	0	0
Aspidoscelis pai	1	0	0
Aspidoscelis parvisocia	1	0	0
Aspidoscelis picta	1	0	0
Aspidoscelis rodecki	1	0	0
Aspidoscelis sackii	1	0	0
Aspidoscelis scalaris	1	0	0
Aspidoscelis sexlineata	1	0	0
Aspidoscelis sonorae	1	0	0
Aspidoscelis stictogramma	1	0	0
Aspidoscelis tesselata	1	0	0
Aspidoscelis tigris	1	0	0
Aspidoscelis uniparens	1	0	0
Aspidoscelis velox	1	0	0
Aspidoscelis xanthonota	1	0	0
Aspidura brachyorrhos	0	0	1
Aspidura ceylonensis	0	0	1
Aspidura copei	0	0	1
Aspidura deraniyagalae	0	0	1
Aspidura drummondhayi	0	0	1
Aspidura guentheri	0	0	1
Aspidura trachyprocta	0	0	1
Aspronema cochabambae	0	0	1
Aspronema dorsivittatum	0	0	1
Asthenodipsas laevis	0	1	0
Asthenodipsas lasgalenensis	0	1	0
Asthenodipsas malaccanus	0	1	0
Asthenodipsas tropidonotus	0	1	0
Asthenodipsas vertebralis	0	1	0
Asymblepharus alaicus	0	1	0
Asymblepharus eremchenkoi	0	1	0
Asymblepharus himalayanus	0	1	1
Asymblepharus ladacensis	0	1	1
Asymblepharus mahabharatus	0	1	0
Asymblepharus nepalensis	0	1	0
Asymblepharus sikimmensis	0	1	1
Asymblepharus tragbulense	0	1	0
Ateuchosaurus chinensis	0	1	0
Ateuchosaurus pellopleurus	0	1	0
Atheris acuminata	0	0	1
Atheris anisolepis	0	0	1
Atheris barbouri	0	0	1
Atheris broadleyi	0	0	1
Atheris ceratophora	0	0	1
Atheris chlorechis	0	0	1
Atheris desaixi	0	0	1
Atheris hirsuta	0	0	1
Atheris hispida	0	0	1
Atheris katangensis	0	0	1
Atheris mabuensis	0	0	1
Atheris matildae	0	0	1
Atheris nitschei	0	0	1
Atheris rungweensis	0	0	1
Atheris squamigera	0	0	1
Atheris subocularis	0	0	1
Atlantolacerta andreanskyi	0	0	1
Atractaspis andersonii	0	0	1
Atractaspis aterrima	0	0	1
Atractaspis battersbyi	0	0	1
Atractaspis bibronii	0	0	1
Atractaspis boulengeri	0	0	1
Atractaspis congica	0	0	1
Atractaspis corpulenta	0	0	1
Atractaspis dahomeyensis	0	0	1
Atractaspis duerdeni	0	0	1
Atractaspis engaddensis	0	0	1
Atractaspis engdahli	0	0	1
Atractaspis fallax	0	0	1
Atractaspis irregularis	0	0	1
Atractaspis leucomelas	0	0	1
Atractaspis magrettii	0	0	1
Atractaspis microlepidota	0	0	1
Atractaspis micropholis	0	0	1
Atractaspis phillipsi	0	0	1
Atractaspis reticulata	0	0	1
Atractaspis scorteccii	0	0	1
Atractaspis watsoni	0	0	1
Atractus acheronius	0	0	1
Atractus albuquerquei	0	0	1
Atractus alphonsehogei	0	0	1
Atractus altagratiae	0	0	1
Atractus alytogrammus	0	0	1
Atractus andinus	0	0	1
Atractus apophis	0	0	1
Atractus arangoi	0	0	1
Atractus atratus	0	0	1
Atractus attenuates	0	0	1
Atractus avernus	0	0	1
Atractus ayeush	0	0	1
Atractus badius	0	0	1
Atractus balzani	0	0	1
Atractus biseriatus	0	0	1
Atractus bocki	0	0	1
Atractus bocourti	0	0	1
Atractus boettgeri	0	0	1
Atractus boulengerii	0	0	1
Atractus caete	0	0	1
Atractus careolepis	0	0	1
Atractus carrioni	0	0	1
Atractus caxiuana	0	0	1
Atractus charitoae	0	0	1
Atractus chthonius	0	0	1
Atractus clarki	0	0	1
Atractus collaris	0	0	1
Atractus crassicaudatus	0	0	1
Atractus darienensis	1	0	0
Atractus depressiocellus	1	0	0
Atractus duboisi	0	0	1
Atractus duidensis	0	0	1
Atractus dunni	0	0	1
Atractus echidna	0	0	1
Atractus ecuadorensis	0	0	1
Atractus edioi	0	0	1
Atractus elaps	0	0	1
Atractus emigdioi	0	0	1
Atractus emmeli	0	0	1
Atractus eriki	0	0	1
Atractus erythromelas	0	0	1
Atractus favae	0	0	1
Atractus flammigerus	0	0	1
Atractus franciscopaivai	0	0	1
Atractus francoi	0	0	1
Atractus fuliginosus	0	0	1
Atractus gaigeae	0	0	1
Atractus gigas	0	0	1
Atractus guentheri	0	0	1
Atractus heliobelluomini	0	0	1
Atractus hoogmoedi	0	0	1
Atractus hostilitractus	1	0	0
Atractus imperfectus	1	0	0
Atractus indistinctus	0	0	1
Atractus insipidus	0	0	1
Atractus iridescens	0	0	1
Atractus lancinii	0	0	1
Atractus lasallei	0	0	1
Atractus latifrons	0	0	1
Atractus lehmanni	0	0	1
Atractus limitaneus	0	0	1
Atractus loveridgei	0	0	1
Atractus macondo	0	0	1
Atractus maculatus	0	0	1
Atractus major	0	0	1
Atractus manizalesensis	0	0	1
Atractus mariselae	0	0	1
Atractus matthewi	0	0	1
Atractus medusa	0	0	1
Atractus melanogaster	0	0	1
Atractus melas	0	0	1
Atractus meridensis	0	0	1
Atractus micheleae	0	0	1
Atractus microrhynchus	0	0	1
Atractus mijaresi	0	0	1
Atractus modestus	0	0	1
Atractus multicinctus	0	0	1
Atractus multidentatus	0	0	1
Atractus nasutus	0	0	1
Atractus natans	0	0	1
Atractus nicefori	0	0	1
Atractus nigricaudus	0	0	1
Atractus nigriventris	0	0	1
Atractus obesus	0	0	1
Atractus obtusirostris	0	0	1
Atractus occidentalis	0	0	1
Atractus occipitoalbus	0	0	1
Atractus ochrosetrus	0	0	1
Atractus oculotemporalis	0	0	1
Atractus orcesi	0	0	1
Atractus paisa	0	0	1
Atractus pamplonensis	0	0	1
Atractus pantostictus	0	0	1
Atractus paraguayensis	0	0	1
Atractus paravertebralis	0	0	1
Atractus paucidens	0	0	1
Atractus pauciscutatus	0	0	1
Atractus peruvianus	0	0	1
Atractus poeppigi	0	0	1
Atractus potschi	0	0	1
Atractus punctiventris	0	0	1
Atractus resplendens	0	0	1
Atractus reticulatus	0	0	1
Atractus riveroi	0	0	1
Atractus ronnie	0	0	1
Atractus roulei	0	0	1
Atractus sanctaemartae	0	0	1
Atractus sanguineus	0	0	1
Atractus savagei	0	0	1
Atractus schach	0	0	1
Atractus serranus	0	0	1
Atractus snethlageae	0	0	1
Atractus spinalis	0	0	1
Atractus steyermarki	0	0	1
Atractus surucucu	0	0	1
Atractus taeniatus	0	0	1
Atractus tamaensis	0	0	1
Atractus tamessari	0	0	1
Atractus taphorni	0	0	1
Atractus thalesdelemai	0	0	1
Atractus titanicus	0	0	1
Atractus torquatus	0	0	1
Atractus touzeti	0	0	1
Atractus trihedrurus	0	0	1
Atractus trilineatus	1	0	1
Atractus trivittatus	0	0	1
Atractus turikensis	0	0	1
Atractus typhon	0	0	1
Atractus univittatus	1	0	0
Atractus variegatus	0	0	1
Atractus ventrimaculatus	0	0	1
Atractus vertebralis	0	0	1
Atractus vertebrolineatus	0	0	1
Atractus vittatus	0	0	1
Atractus wagleri	0	0	1
Atractus werneri	0	0	1
Atractus zebrinus	0	0	1
Atractus zidoki	0	0	1
Atretium schistosum	0	1	1
Atretium yunnanensis	0	1	0
Atropoides indomitus	1	0	0
Atropoides mexicanus	1	0	0
Atropoides nummifer	1	0	0
Atropoides occiduus	1	0	0
Atropoides olmec	1	0	0
Atropoides picadoi	1	0	0
Aurivela longicauda	0	0	1
Aurivela tergolaevigata	0	0	1
Australolacerta australis	0	0	1
Austrelaps labialis	0	0	1
Austrelaps ramsayi	0	0	1
Austrelaps superbus	0	0	1
Azemiops feae	0	1	1
Azemiops kharini	0	1	0
Bachia barbouri	0	0	1
Bachia bicolor	0	0	1
Bachia bresslaui	0	0	1
Bachia cacerensis	0	0	1
Bachia didactyla	0	0	1
Bachia dorbignyi	0	0	1
Bachia flavescens	1	0	1
Bachia geralista	0	0	1
Bachia guianensis	0	0	1
Bachia heteropa	1	0	1
Bachia huallagana	0	0	1
Bachia intermedia	0	0	1
Bachia micromela	0	0	1
Bachia oxyrhina	0	0	1
Bachia pallidiceps	1	0	1
Bachia panoplia	0	0	1
Bachia peruana	0	0	1
Bachia psamophila	0	0	1
Bachia pyburni	0	0	1
Bachia scaea	0	0	1
Bachia scolecoides	0	0	1
Bachia talpa	0	0	1
Bachia trisanale	0	0	1
Baikia africana	0	0	1
Balanophis ceylonensis	0	0	1
Bamanophis dorri	0	0	1
Barisia ciliaris	1	0	0
Barisia herrerae	1	0	0
Barisia imbricata	1	0	0
Barisia levicollis	1	0	0
Barisia rudicollis	1	0	0
Barkudia insularis	0	0	1
Barkudia melanosticta	0	0	1
Basiliscus basiliscus	1	0	1
Basiliscus galeritus	1	0	1
Basiliscus plumifrons	1	0	0
Basiliscus vittatus	1	0	0
Bassiana duperreyi	0	0	1
Bassiana platynota	0	0	1
Bassiana trilineata	0	0	1
Bavayia crassicollis	0	0	1
Bavayia cyclura	0	0	1
Bavayia exsuccida	0	0	1
Bavayia geitaina	0	0	1
Bavayia goroensis	0	0	1
Bavayia montana	0	0	1
Bavayia nubila	0	0	1
Bavayia ornata	0	0	1
Bavayia pulchella	0	0	1
Bavayia robusta	0	0	1
Bavayia sauvagii	0	0	1
Bavayia septuiclavis	0	0	1
Bellatorias frerei	0	0	1
Bellatorias major	0	0	1
Bellatorias obiri	0	0	1
Bipes biporus	1	0	0
Bipes canaliculatus	1	0	0
Bipes tridactylus	1	0	0
Bitia hydroides	0	1	1
Bitis albanica	0	0	1
Bitis arietans	0	0	1
Bitis armata	0	0	1
Bitis atropos	0	0	1
Bitis caudalis	0	0	1
Bitis cornuta	0	0	1
Bitis gabonica	0	0	1
Bitis heraldica	0	0	1
Bitis inornata	0	0	1
Bitis nasicornis	0	0	1
Bitis parviocula	0	0	1
Bitis peringueyi	0	0	1
Bitis rhinoceros	0	0	1
Bitis rubida	0	0	1
Bitis schneideri	0	0	1
Bitis worthingtoni	0	0	1
Bitis xeropaga	0	0	1
Blaesodactylus ambonihazo	0	0	1
Blaesodactylus antongilensis	0	0	1
Blaesodactylus boivini	0	0	1
Blaesodactylus sakalava	0	0	1
Blanus alexandri	0	1	1
Blanus aporus	0	1	1
Blanus cinereus	0	1	0
Blanus mariae	0	1	0
Blanus mettetali	0	1	1
Blanus strauchi	0	1	1
Blanus tingitanus	0	1	1
Blythia reticulata	0	1	1
Boa constrictor	1	0	1
Boaedon capensis	0	0	1
Boaedon fuliginosus	0	0	1
Boaedon lineatus	0	0	1
Boaedon maculatus	0	0	1
Boaedon olivaceus	0	0	1
Boaedon virgatus	0	0	1
Bogertophis rosaliae	1	0	0
Bogertophis subocularis	1	0	0
Boiga andamanensis	0	1	0
Boiga angulata	0	1	0
Boiga barnesii	0	0	1
Boiga beddomei	0	0	1
Boiga bengkuluensis	0	1	0
Boiga bourreti	0	1	0
Boiga ceylonensis	0	0	1
Boiga cyanea	0	1	1
Boiga cynodon	0	1	0
Boiga dendrophila	0	1	0
Boiga dightoni	0	0	1
Boiga drapiezii	0	1	0
Boiga flaviviridis	0	0	1
Boiga forsteni	0	1	1
Boiga gokool	0	1	1
Boiga guangxiensis	0	1	0
Boiga hoeseli	0	1	0
Boiga irregularis	0	1	1
Boiga jaspidea	0	1	0
Boiga kraepelini	0	1	0
Boiga multifasciata	0	1	1
Boiga multomaculata	0	1	0
Boiga nigriceps	0	1	0
Boiga nuchalis	0	1	1
Boiga ochracea	0	1	1
Boiga philippina	0	1	0
Boiga quincunciata	0	0	1
Boiga saengsomi	0	1	0
Boiga schultzei	0	1	0
Boiga siamensis	0	1	1
Boiga tanahjampeana	0	1	0
Boiga trigonata	0	1	1
Boiga wallachi	0	1	0
Boiruna maculata	0	0	1
Boiruna sertaneja	0	0	1
Bolyeria multocarinata	0	0	1
Borikenophis portoricensis	1	0	0
Borikenophis sanctaecrucis	1	0	0
Borikenophis variegatus	1	0	0
Bothriechis aurifer	1	0	0
Bothriechis bicolor	1	0	0
Bothriechis guifarroi	1	0	0
Bothriechis lateralis	1	0	0
Bothriechis marchi	1	0	0
Bothriechis nigroviridis	1	0	0
Bothriechis rowleyi	1	0	0
Bothriechis schlegelii	1	0	1
Bothriechis supraciliaris	1	0	0
Bothriechis thalassinus	1	0	0
Bothrochilus albertisii	0	0	1
Bothrochilus biakensis	0	0	1
Bothrochilus boa	0	0	1
Bothrochilus fredparkeri	0	0	1
Bothrochilus huonensis	0	0	1
Bothrocophias andianus	0	0	1
Bothrocophias campbelli	0	0	1
Bothrocophias colombianus	0	0	1
Bothrocophias hyoprora	0	0	1
Bothrocophias microphthalmus	0	0	1
Bothrocophias myersi	0	0	1
Bothrolycus ater	0	0	1
Bothrophthalmus brunneus	0	0	1
Bothrophthalmus lineatus	0	0	1
Bothrops alcatraz	0	0	1
Bothrops alternatus	0	0	1
Bothrops ammodytoides	0	0	1
Bothrops asper	1	0	1
Bothrops atrox	0	0	1
Bothrops ayerbei	0	0	1
Bothrops barnetti	0	0	1
Bothrops bilineata	0	0	1
Bothrops brazili	0	0	1
Bothrops caribbaeus	1	0	0
Bothrops chloromelas	0	0	1
Bothrops cotiara	0	0	1
Bothrops diporus	0	0	1
Bothrops erythromelas	0	0	1
Bothrops fonsecai	0	0	1
Bothrops insularis	0	0	1
Bothrops itapetiningae	0	0	1
Bothrops jararaca	0	0	1
Bothrops jararacussu	0	0	1
Bothrops jonathani	0	0	1
Bothrops lanceolatus	1	0	0
Bothrops leucurus	0	0	1
Bothrops lojanus	0	0	1
Bothrops lutzi	0	0	1
Bothrops marajoensis	0	0	1
Bothrops marmoratus	0	0	1
Bothrops matogrossensis	0	0	1
Bothrops medusa	0	0	1
Bothrops moojeni	0	0	1
Bothrops muriciensis	0	0	1
Bothrops neuwiedi	0	0	1
Bothrops oligolepis	0	0	1
Bothrops osbornei	0	0	1
Bothrops otavioi	0	0	1
Bothrops pauloensis	0	0	1
Bothrops pictus	0	0	1
Bothrops pirajai	0	0	1
Bothrops pubescens	0	0	1
Bothrops pulchra	0	0	1
Bothrops punctatus	1	0	1
Bothrops rhombeatus	0	0	1
Bothrops sanctaecrucis	0	0	1
Bothrops taeniata	0	0	1
Bothrops venezuelensis	1	0	1
Brachylophus bulabula	0	0	1
Brachylophus fasciatus	0	0	1
Brachylophus vitiensis	0	0	1
Brachymeles apus	0	1	0
Brachymeles bicolandia	0	1	0
Brachymeles bicolor	0	1	0
Brachymeles boholensis	0	1	0
Brachymeles bonitae	0	1	0
Brachymeles boulengeri	0	1	0
Brachymeles brevidactylus	0	1	0
Brachymeles cebuensis	0	1	0
Brachymeles cobos	0	1	0
Brachymeles elerae	0	1	0
Brachymeles gracilis	0	1	0
Brachymeles hilong	0	1	0
Brachymeles kadwa	0	1	0
Brachymeles libayani	0	1	0
Brachymeles lukbani	0	1	0
Brachymeles makusog	0	1	0
Brachymeles mindorensis	0	1	0
Brachymeles minimus	0	1	0
Brachymeles miriamae	0	1	0
Brachymeles muntingkamay	0	1	0
Brachymeles orientalis	0	1	0
Brachymeles paeforum	0	1	0
Brachymeles pathfinderi	0	1	0
Brachymeles samad	0	1	0
Brachymeles samarensis	0	1	0
Brachymeles schadenbergi	0	1	0
Brachymeles suluensis	0	1	0
Brachymeles talinis	0	1	0
Brachymeles taylori	0	1	0
Brachymeles tiboliorum	0	1	0
Brachymeles tridactylus	0	1	0
Brachymeles tungaoi	0	1	0
Brachymeles vermis	0	1	0
Brachymeles vindumi	0	1	0
Brachymeles vulcani	0	1	0
Brachymeles wrighti	0	1	0
Brachyophidium rhodogaster	0	0	1
Brachyophis revoili	0	0	1
Brachyorrhos albus	0	1	1
Brachyorrhos gastrotaenius	0	1	0
Brachyorrhos raffrayi	0	0	1
Brachyorrhos wallacei	0	0	1
Brachysaura minor	0	1	1
Brachyurophis approximans	0	0	1
Brachyurophis australis	0	0	1
Brachyurophis fasciolatus	0	0	1
Brachyurophis incinctus	0	0	1
Brachyurophis morrisi	0	0	1
Brachyurophis roperi	0	0	1
Brachyurophis semifasciatus	0	0	1
Bradypodion atromontanum	0	0	1
Bradypodion caeruleogula	0	0	1
Bradypodion caffer	0	0	1
Bradypodion damaranum	0	0	1
Bradypodion dracomontanum	0	0	1
Bradypodion gutturale	0	0	1
Bradypodion kentanicum	0	0	1
Bradypodion melanocephalum	0	0	1
Bradypodion nemorale	0	0	1
Bradypodion ngomeense	0	0	1
Bradypodion occidentale	0	0	1
Bradypodion pumilum	0	0	1
Bradypodion setaroi	0	0	1
Bradypodion taeniabronchum	0	0	1
Bradypodion thamnobates	0	0	1
Bradypodion transvaalense	0	0	1
Bradypodion ventrale	0	0	1
Brasiliscincus agilis	0	0	1
Brasiliscincus caissara	0	0	1
Brasiliscincus heathi	0	0	1
Broadleysaurus major	0	0	1
Bronchocela celebensis	0	1	0
Bronchocela cristatella	0	1	1
Bronchocela danieli	0	1	0
Bronchocela hayeki	0	1	0
Bronchocela jubata	0	1	0
Bronchocela marmorata	0	1	0
Bronchocela orlovi	0	1	0
Bronchocela rubrigularis	0	1	0
Bronchocela smaragdina	0	1	0
Bronchocela vietnamensis	0	1	0
Brookesia ambreensis	0	0	1
Brookesia antakarana	0	0	1
Brookesia bekolosy	0	0	1
Brookesia betschi	0	0	1
Brookesia bonsi	0	0	1
Brookesia brunoi	0	0	1
Brookesia brygooi	0	0	1
Brookesia confidens	0	0	1
Brookesia decaryi	0	0	1
Brookesia dentata	0	0	1
Brookesia desperata	0	0	1
Brookesia ebenaui	0	0	1
Brookesia exarmata	0	0	1
Brookesia griveaudi	0	0	1
Brookesia karchei	0	0	1
Brookesia lambertoni	0	0	1
Brookesia lineata	0	0	1
Brookesia micra	0	0	1
Brookesia minima	0	0	1
Brookesia perarmata	0	0	1
Brookesia peyrierasi	0	0	1
Brookesia ramanantsoai	0	0	1
Brookesia stumpffi	0	0	1
Brookesia superciliaris	0	0	1
Brookesia therezieni	0	0	1
Brookesia thieli	0	0	1
Brookesia tristis	0	0	1
Brookesia tuberculata	0	0	1
Brookesia vadoni	0	0	1
Brookesia valerieae	0	0	1
Brygophis coulangesi	0	0	1
Bufoniceps laungwalaensis	0	0	1
Buhoma depressiceps	0	0	1
Buhoma procterae	0	0	1
Buhoma vauerocegae	0	0	1
Bungarus andamanensis	0	1	0
Bungarus bungaroides	0	1	1
Bungarus caeruleus	0	1	1
Bungarus candidus	0	1	0
Bungarus ceylonicus	0	0	1
Bungarus fasciatus	0	1	1
Bungarus flaviceps	0	1	0
Bungarus lividus	0	1	1
Bungarus magnimaculatus	0	1	1
Bungarus multicinctus	0	1	1
Bungarus niger	0	1	1
Bungarus sindanus	0	1	1
Bungarus slowinskii	0	1	0
Bunopus blanfordii	0	0	1
Bunopus crassicauda	0	1	0
Bunopus spatalurus	0	0	1
Bunopus tuberculatus	0	1	1
Caaeteboia amarali	0	0	1
Cacophis churchilli	0	0	1
Cacophis harriettae	0	0	1
Cacophis krefftii	0	0	1
Cacophis squamulosus	0	0	1
Cadea blanoides	1	0	0
Cadea palirostrata	1	0	0
Calabaria reinhardtii	0	0	1
Calamaria abramovi	0	1	0
Calamaria abstrusa	0	1	0
Calamaria acutirostris	0	1	0
Calamaria albiventer	0	1	0
Calamaria alidae	0	1	0
Calamaria apraeocularis	0	1	0
Calamaria banggaiensis	0	1	0
Calamaria battersbyi	0	1	0
Calamaria bicolor	0	1	0
Calamaria bitorques	0	1	0
Calamaria boesemani	0	1	0
Calamaria borneensis	0	1	0
Calamaria brongersmai	0	1	0
Calamaria buchi	0	1	0
Calamaria butonensis	0	1	0
Calamaria ceramensis	0	1	0
Calamaria concolor	0	1	0
Calamaria crassa	0	1	0
Calamaria curta	0	1	0
Calamaria doederleini	0	1	0
Calamaria eiselti	0	1	0
Calamaria everetti	0	1	0
Calamaria forcarti	0	1	0
Calamaria gervaisii	0	1	0
Calamaria gialaiensis	0	1	0
Calamaria grabowskyi	0	1	0
Calamaria gracillima	0	1	0
Calamaria griswoldi	0	1	0
Calamaria hilleniusi	0	1	0
Calamaria ingeri	0	1	0
Calamaria javanica	0	1	0
Calamaria joloensis	0	1	0
Calamaria lateralis	0	1	0
Calamaria lautensis	0	1	0
Calamaria leucogaster	0	1	0
Calamaria linnaei	0	1	0
Calamaria longirostris	0	1	0
Calamaria lovii	0	1	0
Calamaria lumbricoidea	0	1	0
Calamaria lumholtzi	0	1	0
Calamaria margaritophora	0	1	0
Calamaria mecheli	0	1	0
Calamaria melanota	0	1	0
Calamaria modesta	0	1	0
Calamaria muelleri	0	1	0
Calamaria nuchalis	0	1	0
Calamaria palawanensis	0	1	0
Calamaria pavimentata	0	1	1
Calamaria pfefferi	0	1	0
Calamaria prakkei	0	1	0
Calamaria rebentischi	0	1	0
Calamaria sangi	0	1	0
Calamaria schlegeli	0	1	0
Calamaria schmidti	0	1	0
Calamaria septentrionalis	0	1	0
Calamaria suluensis	0	1	0
Calamaria sumatrana	0	1	0
Calamaria thanhi	0	1	0
Calamaria ulmeri	0	1	0
Calamaria virgulata	0	1	0
Calamaria yunnanensis	0	1	0
Calamodontophis paucidens	0	0	1
Calamodontophis ronaldoi	0	0	1
Calamophis jobiensis	0	0	1
Calamophis katesandersae	0	0	1
Calamophis ruuddelangi	0	0	1
Calamophis sharonbrooksae	0	0	1
Calamorhabdium acuticeps	0	1	0
Calamorhabdium kuekenthali	0	0	1
Caledoniscincus aquilonius	0	0	1
Caledoniscincus atropunctatus	0	0	1
Caledoniscincus auratus	0	0	1
Caledoniscincus austrocaledonicus	0	0	1
Caledoniscincus chazeaui	0	0	1
Caledoniscincus constellatus	0	0	1
Caledoniscincus cryptos	0	0	1
Caledoniscincus festivus	0	0	1
Caledoniscincus haplorhinus	0	0	1
Caledoniscincus notialis	0	0	1
Caledoniscincus orestes	0	0	1
Caledoniscincus pelletieri	0	0	1
Caledoniscincus renevieri	0	0	1
Caledoniscincus terma	0	0	1
Calliophis beddomei	0	0	1
Calliophis bibroni	0	0	1
Calliophis bivirgata	0	1	0
Calliophis castoe	0	0	1
Calliophis gracilis	0	1	0
Calliophis haematoetron	0	0	1
Calliophis intestinalis	0	1	0
Calliophis maculiceps	0	1	1
Calliophis melanurus	0	1	1
Calliophis nigrescens	0	0	1
Callisaurus draconoides	1	0	0
Callopistes flavipunctatus	0	0	1
Callopistes maculatus	0	0	1
Calloselasma rhodostoma	0	1	0
Calodactylodes aureus	0	0	1
Calodactylodes illingworthorum	0	0	1
Calotes aurantolabium	0	0	1
Calotes bachae	0	1	0
Calotes bhutanensis	0	1	0
Calotes calotes	0	0	1
Calotes ceylonensis	0	0	1
Calotes chincollium	0	0	1
Calotes desilvai	0	0	1
Calotes ellioti	0	0	1
Calotes emma	0	1	1
Calotes grandisquamis	0	0	1
Calotes htunwini	0	1	1
Calotes irawadi	0	1	1
Calotes jerdoni	0	1	1
Calotes liocephalus	0	0	1
Calotes liolepis	0	0	1
Calotes manamendrai	0	0	1
Calotes maria	0	0	1
Calotes medogensis	0	1	0
Calotes mystaceus	0	1	1
Calotes nemoricola	0	0	1
Calotes nigrilabris	0	0	1
Calotes nigriplicatus	0	1	0
Calotes pethiyagodai	0	0	1
Calotes rouxii	0	0	1
Calotes versicolor	0	1	1
Calumma amber	0	0	1
Calumma ambreense	0	0	1
Calumma andringitraense	0	0	1
Calumma boettgeri	0	0	1
Calumma brevicorne	0	0	1
Calumma capuroni	0	0	1
Calumma crypticum	0	0	1
Calumma cucullatum	0	0	1
Calumma fallax	0	0	1
Calumma furcifer	0	0	1
Calumma gallus	0	0	1
Calumma gastrotaenia	0	0	1
Calumma glawi	0	0	1
Calumma globifer	0	0	1
Calumma guibei	0	0	1
Calumma guillaumeti	0	0	1
Calumma hafahafa	0	0	1
Calumma hilleniusi	0	0	1
Calumma jejy	0	0	1
Calumma malthe	0	0	1
Calumma marojezense	0	0	1
Calumma nasutum	0	0	1
Calumma oshaughnessyi	0	0	1
Calumma parsonii	0	0	1
Calumma peltierorum	0	0	1
Calumma peyrierasi	0	0	1
Calumma tarzan	0	0	1
Calumma tsaratananense	0	0	1
Calumma tsycorne	0	0	1
Calumma vatosoa	0	0	1
Calumma vencesi	0	0	1
Calumma vohibola	0	0	1
Calyptommatus confusionibus	0	0	1
Calyptommatus leiolepis	0	0	1
Calyptommatus nicterus	0	0	1
Calyptommatus sinebrachiatus	0	0	1
Calyptotis lepidorostrum	0	0	1
Calyptotis ruficauda	0	0	1
Calyptotis scutirostrum	0	0	1
Calyptotis temporalis	0	0	1
Calyptotis thorntonensis	0	0	1
Candoia aspera	0	0	1
Candoia bibroni	0	0	1
Candoia carinata	0	1	1
Candoia paulsoni	0	1	1
Candoia superciliosa	0	0	1
Cantoria violacea	0	1	0
Caparaonia itaiquara	0	0	1
Capitellum mariagalantae	1	0	0
Capitellum metallicum	1	0	0
Capitellum parvicruzae	1	0	0
Caraiba andreae	1	0	0
Carlia aenigma	0	0	1
Carlia ailanpalai	0	0	1
Carlia amax	0	0	1
Carlia aramia	0	0	1
Carlia babarensis	0	1	0
Carlia beccarii	0	1	0
Carlia bicarinata	0	0	1
Carlia bomberai	0	0	1
Carlia caesius	0	0	1
Carlia decora	0	0	1
Carlia diguliensis	0	0	1
Carlia dogare	0	0	1
Carlia eothen	0	0	1
Carlia fusca	0	1	1
Carlia gracilis	0	0	1
Carlia inconnexa	0	0	1
Carlia jarnoldae	0	0	1
Carlia johnstonei	0	0	1
Carlia leucotaenia	0	1	0
Carlia longipes	0	0	1
Carlia luctuosa	0	0	1
Carlia munda	0	0	1
Carlia mysi	0	0	1
Carlia nigrauris	0	1	0
Carlia pectoralis	0	0	1
Carlia peronii	0	1	0
Carlia pulla	0	0	1
Carlia quinquecarinata	0	0	1
Carlia rhomboidalis	0	0	1
Carlia rimula	0	0	1
Carlia rostralis	0	0	1
Carlia rubigo	0	0	1
Carlia rubrigularis	0	0	1
Carlia rufilatus	0	0	1
Carlia schmeltzii	0	0	1
Carlia sexdentata	0	0	1
[truncated: 7,756 more rows]

## Sheet: 9 Areas
Tonini	AF	AR	AU	CA	EU	IN	NAM	SA	SU
Ablepharus bivittatus	0	0	0	0	1	0	0	0	0
Ablepharus budaki	1	1	0	0	1	0	0	0	0
Ablepharus chernovi	1	1	0	0	1	0	0	0	0
Ablepharus darvazi	0	0	0	0	1	0	0	0	0
Ablepharus deserti	0	0	0	0	1	0	0	0	0
Ablepharus grayanus	0	0	0	0	1	1	0	0	0
Ablepharus kitaibelii	0	0	0	0	1	0	0	0	0
Ablepharus lindbergi	0	0	0	0	1	0	0	0	0
Ablepharus pannonicus	0	1	0	0	1	1	0	0	0
Ablepharus rueppellii	1	1	0	0	1	0	0	0	0
Abronia anzuetoi	0	0	0	0	0	0	1	0	0
Abronia aurita	0	0	0	1	0	0	1	0	0
Abronia bogerti	0	0	0	0	0	0	1	0	0
Abronia campbelli	0	0	0	1	0	0	0	0	0
Abronia chiszari	0	0	0	0	0	0	1	0	0
Abronia deppii	0	0	0	0	0	0	1	0	0
Abronia fimbriata	0	0	0	0	0	0	1	0	0
Abronia frosti	0	0	0	0	0	0	1	0	0
Abronia fuscolabialis	0	0	0	0	0	0	1	0	0
Abronia gaiophantasma	0	0	0	0	0	0	1	0	0
Abronia graminea	0	0	0	0	0	0	1	0	0
Abronia leurolepis	0	0	0	0	0	0	1	0	0
Abronia lythrochila	0	0	0	0	0	0	1	0	0
Abronia martindelcampoi	0	0	0	0	0	0	1	0	0
Abronia matudai	0	0	0	0	0	0	1	0	0
Abronia meledona	0	0	0	1	0	0	1	0	0
Abronia mitchelli	0	0	0	0	0	0	1	0	0
Abronia mixteca	0	0	0	0	0	0	1	0	0
Abronia montecristoi	0	0	0	1	0	0	0	0	0
Abronia oaxacae	0	0	0	0	0	0	1	0	0
Abronia ochoterenai	0	0	0	0	0	0	1	0	0
Abronia ornelasi	0	0	0	0	0	0	1	0	0
Abronia ramirezi	0	0	0	0	0	0	1	0	0
Abronia reidi	0	0	0	0	0	0	1	0	0
Abronia salvadorensis	0	0	0	1	0	0	0	0	0
Abronia smithi	0	0	0	0	0	0	1	0	0
Abronia taeniata	0	0	0	0	0	0	1	0	0
Abronia vasconcelosii	0	0	0	0	0	0	1	0	0
Acanthocercus adramitanus	0	1	0	0	0	0	0	0	0
Acanthocercus annectens	1	1	0	0	0	0	0	0	0
Acanthocercus atricollis	1	0	0	0	0	0	0	0	0
Acanthocercus branchi	1	0	0	0	0	0	0	0	0
Acanthocercus cyanogaster	1	0	0	0	0	0	0	0	0
Acanthocercus guentherpetersi	1	1	0	0	0	0	0	0	0
Acanthocercus phillipsii	1	0	0	0	0	0	0	0	0
Acanthocercus yemensis	0	1	0	0	0	0	0	0	0
Acanthodactylus aegyptius	1	0	0	0	0	0	0	0	0
Acanthodactylus ahmaddisii	0	1	0	0	0	0	0	0	0
Acanthodactylus arabicus	0	1	0	0	0	0	0	0	0
Acanthodactylus aureus	1	0	0	0	0	0	0	0	0
Acanthodactylus bedriagai	1	0	0	0	0	0	0	0	0
Acanthodactylus beershebensis	1	1	0	0	0	0	0	0	0
Acanthodactylus blanci	1	0	0	0	0	0	0	0	0
Acanthodactylus blanfordii	0	1	0	0	1	1	0	0	0
Acanthodactylus boskianus	1	1	0	0	1	0	0	0	0
Acanthodactylus boueti	1	0	0	0	0	0	0	0	0
Acanthodactylus busacki	1	0	0	0	0	0	0	0	0
Acanthodactylus cantoris	0	0	0	0	1	1	0	0	0
Acanthodactylus dumerilii	1	0	0	0	1	0	0	0	0
Acanthodactylus erythrurus	1	0	0	0	1	0	0	0	0
Acanthodactylus felicis	0	1	0	0	0	0	0	0	0
Acanthodactylus gongrorhynchatus	0	1	0	0	0	0	0	0	0
Acanthodactylus grandis	0	1	0	0	1	0	0	0	0
Acanthodactylus guineensis	1	0	0	0	0	0	0	0	0
Acanthodactylus haasi	0	1	0	0	0	0	0	0	0
Acanthodactylus hardyi	0	1	0	0	1	0	0	0	0
Acanthodactylus harranensis	0	1	0	0	0	0	0	0	0
Acanthodactylus khamirensis	0	0	0	0	1	0	0	0	0
Acanthodactylus lineomaculatus	1	0	0	0	1	0	0	0	0
Acanthodactylus longipes	1	0	0	0	0	0	0	0	0
Acanthodactylus maculatus	1	0	0	0	1	0	0	0	0
Acanthodactylus masirae	0	1	0	0	0	0	0	0	0
Acanthodactylus micropholis	0	1	0	0	1	1	0	0	0
Acanthodactylus nilsoni	0	0	0	0	1	0	0	0	0
Acanthodactylus opheodurus	1	1	0	0	0	0	0	0	0
Acanthodactylus orientalis	0	1	0	0	0	0	0	0	0
Acanthodactylus pardalis	1	0	0	0	0	0	0	0	0
Acanthodactylus robustus	0	1	0	0	0	0	0	0	0
Acanthodactylus savignyi	1	0	0	0	1	0	0	0	0
Acanthodactylus schmidti	1	1	0	0	1	0	0	0	0
Acanthodactylus schreiberi	0	0	0	0	1	0	0	0	0
Acanthodactylus scutellatus	1	1	0	0	1	0	0	0	0
Acanthodactylus senegalensis	1	0	0	0	0	0	0	0	0
Acanthodactylus spinicauda	1	0	0	0	0	0	0	0	0
Acanthodactylus taghitensis	1	0	0	0	0	0	0	0	0
Acanthodactylus tilburyi	0	1	0	0	0	0	0	0	0
Acanthodactylus tristrami	1	1	0	0	0	0	0	0	0
Acanthodactylus yemenicus	0	1	0	0	0	0	0	0	0
Acanthophis antarcticus	0	0	1	0	0	0	0	0	0
Acanthophis hawkei	0	0	1	0	0	0	0	0	0
Acanthophis laevis	0	0	1	0	0	0	0	0	1
Acanthophis praelongus	0	0	1	0	0	0	0	0	0
Acanthophis pyrrhus	0	0	1	0	0	0	0	0	0
Acanthophis rugosus	0	0	1	0	0	0	0	0	1
Acanthophis wellsi	0	0	1	0	0	0	0	0	0
Acanthosaura armata	0	0	0	0	1	0	0	0	1
Acanthosaura bintangensis	0	0	0	0	0	0	0	0	1
Acanthosaura brachypoda	0	0	0	0	1	0	0	0	0
Acanthosaura capra	0	0	0	0	0	0	0	0	1
Acanthosaura cardamomensis	0	0	0	0	0	0	0	0	1
Acanthosaura coronata	0	0	0	0	0	0	0	0	1
Acanthosaura crucigera	0	0	0	0	1	0	0	0	1
Acanthosaura lepidogaster	0	0	0	0	1	1	0	0	1
Acanthosaura nataliae	0	0	0	0	1	0	0	0	1
Acanthosaura titiwangsaensis	0	0	0	0	0	0	0	0	1
Achalinus ater	0	0	0	0	1	0	0	0	0
Achalinus formosanus	0	0	0	0	1	0	0	0	0
Achalinus hainanus	0	0	0	0	1	0	0	0	0
Achalinus jinggangensis	0	0	0	0	1	0	0	0	0
Achalinus meiguensis	0	0	0	0	1	0	0	0	0
Achalinus niger	0	0	0	0	1	0	0	0	0
Achalinus rufescens	0	0	0	0	1	0	0	0	0
Achalinus spinalis	0	0	0	0	1	0	0	0	0
Achalinus werneri	0	0	0	0	1	0	0	0	0
Acontias aurantiacus	1	0	0	0	0	0	0	0	0
Acontias bicolor	1	0	0	0	0	0	0	0	0
Acontias breviceps	1	0	0	0	0	0	0	0	0
Acontias cregoi	1	0	0	0	0	0	0	0	0
Acontias gariepensis	1	0	0	0	0	0	0	0	0
Acontias gracilicauda	1	0	0	0	0	0	0	0	0
Acontias jappi	1	0	0	0	0	0	0	0	0
Acontias kgalagadi	1	0	0	0	0	0	0	0	0
Acontias lineatus	1	0	0	0	0	0	0	0	0
Acontias litoralis	1	0	0	0	0	0	0	0	0
Acontias meleagris	1	0	0	0	0	0	0	0	0
Acontias namaquensis	1	0	0	0	0	0	0	0	0
Acontias occidentalis	1	0	0	0	0	0	0	0	0
Acontias orientalis	1	0	0	0	0	0	0	0	0
Acontias percivali	1	0	0	0	0	0	0	0	0
Acontias plumbeus	1	0	0	0	0	0	0	0	0
Acontias poecilus	1	0	0	0	0	0	0	0	0
Acontias richardi	1	0	0	0	0	0	0	0	0
Acontias rieppeli	1	0	0	0	0	0	0	0	0
Acontias schmitzi	1	0	0	0	0	0	0	0	0
Acontias tristis	1	0	0	0	0	0	0	0	0
Acrantophis dumerili	1	0	0	0	0	0	0	0	0
Acrantophis madagascariensis	1	0	0	0	0	0	0	0	0
Acratosaura mentalis	0	0	0	0	0	0	0	1	0
Acratosaura spinosa	0	0	0	0	0	0	0	1	0
Acrochordus arafurae	0	0	1	0	0	0	0	0	0
Acrochordus granulatus	0	0	1	0	1	1	0	0	1
Acrochordus javanicus	0	0	0	0	1	0	0	0	1
Acutotyphlops banaorum	0	0	0	0	0	0	0	0	1
Acutotyphlops infralabialis	0	0	1	0	0	0	0	0	0
Acutotyphlops kunuaensis	0	0	1	0	0	0	0	0	0
Acutotyphlops solomonis	0	0	1	0	0	0	0	0	0
Acutotyphlops subocularis	0	0	1	0	0	0	0	0	0
Adelophis copei	0	0	0	0	0	0	1	0	0
Adelophis foxi	0	0	0	0	0	0	1	0	0
Adelphicos daryi	0	0	0	0	0	0	1	0	0
Adelphicos ibarrorum	0	0	0	0	0	0	1	0	0
Adelphicos latifasciatum	0	0	0	0	0	0	1	0	0
Adelphicos nigrilatum	0	0	0	0	0	0	1	0	0
Adelphicos quadrivirgatum	0	0	0	1	0	0	1	0	0
Adelphicos veraepacis	0	0	0	0	0	0	1	0	0
Adercosaurus vixadnexus	0	0	0	0	0	0	0	1	0
Adolfus africanus	1	0	0	0	0	0	0	0	0
Adolfus alleni	1	0	0	0	0	0	0	0	0
Adolfus jacksoni	1	0	0	0	0	0	0	0	0
Adolfus masavaensis	1	0	0	0	0	0	0	0	0
Aeluroglena cucullata	1	0	0	0	0	0	0	0	0
Aeluroscalabotes felinus	0	0	0	0	0	0	0	0	1
Afroablepharus africanus	1	0	0	0	0	0	0	0	0
Afroablepharus annobonensis	1	0	0	0	0	0	0	0	0
Afroablepharus duruarum	1	0	0	0	0	0	0	0	0
Afroablepharus maculicollis	1	0	0	0	0	0	0	0	0
Afroablepharus seydeli	1	0	0	0	0	0	0	0	0
Afroablepharus wahlbergi	1	0	0	0	0	0	0	0	0
Afroablepharus wilsoni	1	0	0	0	0	0	0	0	0
Afroedura africana	1	0	0	0	0	0	0	0	0
Afroedura amatolica	1	0	0	0	0	0	0	0	0
Afroedura bogerti	1	0	0	0	0	0	0	0	0
Afroedura broadleyi	1	0	0	0	0	0	0	0	0
Afroedura granitica	1	0	0	0	0	0	0	0	0
Afroedura haackei	1	0	0	0	0	0	0	0	0
Afroedura halli	1	0	0	0	0	0	0	0	0
Afroedura hawequensis	1	0	0	0	0	0	0	0	0
Afroedura karroica	1	0	0	0	0	0	0	0	0
Afroedura langi	1	0	0	0	0	0	0	0	0
Afroedura leoloensis	1	0	0	0	0	0	0	0	0
Afroedura loveridgei	1	0	0	0	0	0	0	0	0
Afroedura major	1	0	0	0	0	0	0	0	0
Afroedura maripi	1	0	0	0	0	0	0	0	0
Afroedura marleyi	1	0	0	0	0	0	0	0	0
Afroedura multiporis	1	0	0	0	0	0	0	0	0
Afroedura namaquensis	1	0	0	0	0	0	0	0	0
Afroedura nivaria	1	0	0	0	0	0	0	0	0
Afroedura pienaari	1	0	0	0	0	0	0	0	0
Afroedura pondolia	1	0	0	0	0	0	0	0	0
Afroedura pongola	1	0	0	0	0	0	0	0	0
Afroedura rondavelica	1	0	0	0	0	0	0	0	0
Afroedura rupestris	1	0	0	0	0	0	0	0	0
Afroedura tembulica	1	0	0	0	0	0	0	0	0
Afroedura tirasensis	1	0	0	0	0	0	0	0	0
Afroedura transvaalica	1	0	0	0	0	0	0	0	0
Afroedura waterbergensis	1	0	0	0	0	0	0	0	0
Afrogecko ansorgii	1	0	0	0	0	0	0	0	0
Afrogecko porphyreus	1	0	0	0	0	0	0	0	0
Afronatrix anoscopus	1	0	0	0	0	0	0	0	0
Afrotyphlops angeli	1	0	0	0	0	0	0	0	0
Afrotyphlops angolensis	1	0	0	0	0	0	0	0	0
Afrotyphlops anomalus	1	0	0	0	0	0	0	0	0
Afrotyphlops bibronii	1	0	0	0	0	0	0	0	0
Afrotyphlops blanfordii	1	0	0	0	0	0	0	0	0
Afrotyphlops brevis	1	0	0	0	0	0	0	0	0
Afrotyphlops congestus	1	0	0	0	0	0	0	0	0
Afrotyphlops decorosus	1	0	0	0	0	0	0	0	0
Afrotyphlops elegans	1	0	0	0	0	0	0	0	0
Afrotyphlops fornasinii	1	0	0	0	0	0	0	0	0
Afrotyphlops gierrai	1	0	0	0	0	0	0	0	0
Afrotyphlops kaimosae	1	0	0	0	0	0	0	0	0
Afrotyphlops liberiensis	1	0	0	0	0	0	0	0	0
Afrotyphlops lineolatus	1	0	0	0	0	0	0	0	0
Afrotyphlops manni	1	0	0	0	0	0	0	0	0
Afrotyphlops mucruso	1	0	0	0	0	0	0	0	0
Afrotyphlops nanus	1	0	0	0	0	0	0	0	0
Afrotyphlops nigrocandidus	1	0	0	0	0	0	0	0	0
Afrotyphlops obtusus	1	0	0	0	0	0	0	0	0
Afrotyphlops punctatus	1	0	0	0	0	0	0	0	0
Afrotyphlops rondoensis	1	0	0	0	0	0	0	0	0
Afrotyphlops schlegelii	1	0	0	0	0	0	0	0	0
Afrotyphlops schmidti	1	0	0	0	0	0	0	0	0
Afrotyphlops steinhausi	1	0	0	0	0	0	0	0	0
Afrotyphlops tanganicanus	1	0	0	0	0	0	0	0	0
Afrotyphlops usambaricus	1	0	0	0	0	0	0	0	0
Agama aculeata	1	0	0	0	0	0	0	0	0
Agama africana	1	0	0	0	0	0	0	0	0
Agama agama	1	0	0	0	0	0	0	0	0
Agama anchietae	1	0	0	0	0	0	0	0	0
Agama armata	1	0	0	0	0	0	0	0	0
Agama atra	1	0	0	0	0	0	0	0	0
Agama bocourti	1	0	0	0	0	0	0	0	0
Agama boensis	1	0	0	0	0	0	0	0	0
Agama bottegi	1	0	0	0	0	0	0	0	0
Agama boueti	1	0	0	0	0	0	0	0	0
Agama boulengeri	1	0	0	0	0	0	0	0	0
Agama caudospinosa	1	0	0	0	0	0	0	0	0
Agama cristata	1	0	0	0	0	0	0	0	0
Agama doriae	1	0	0	0	0	0	0	0	0
Agama etoshae	1	0	0	0	0	0	0	0	0
Agama finchi	1	0	0	0	0	0	0	0	0
Agama gracilimembris	1	0	0	0	0	0	0	0	0
Agama hartmanni	1	0	0	0	0	0	0	0	0
Agama hispida	1	0	0	0	0	0	0	0	0
Agama impalearis	1	0	0	0	1	0	0	0	0
Agama insularis	1	0	0	0	0	0	0	0	0
Agama kaimosae	1	0	0	0	0	0	0	0	0
Agama kirkii	1	0	0	0	0	0	0	0	0
Agama knobeli	1	0	0	0	0	0	0	0	0
Agama lanzai	1	0	0	0	0	0	0	0	0
Agama lebretoni	1	0	0	0	0	0	0	0	0
Agama lionotus	1	0	0	0	0	0	0	0	0
Agama lucyae	1	0	0	0	0	0	0	0	0
Agama montana	1	0	0	0	0	0	0	0	0
Agama mossambica	1	0	0	0	0	0	0	0	0
Agama mucosoensis	1	0	0	0	0	0	0	0	0
Agama mwanzae	1	0	0	0	0	0	0	0	0
Agama parafricana	1	0	0	0	0	0	0	0	0
Agama paragama	1	0	0	0	0	0	0	0	0
Agama persimilis	1	0	0	0	0	0	0	0	0
Agama planiceps	1	0	0	0	0	0	0	0	0
Agama robecchii	1	0	0	0	0	0	0	0	0
Agama rueppelli	1	0	0	0	0	0	0	0	0
Agama sankaranica	1	0	0	0	0	0	0	0	0
Agama somalica	1	0	0	0	0	0	0	0	0
Agama spinosa	1	1	0	0	0	0	0	0	0
Agama sylvana	1	0	0	0	0	0	0	0	0
Agama tassiliensis	1	0	0	0	0	0	0	0	0
Agama turuensis	1	0	0	0	0	0	0	0	0
Agama weidholzi	1	0	0	0	0	0	0	0	0
Agamodon anguliceps	1	0	0	0	0	0	0	0	0
Agamodon arabicus	0	1	0	0	0	0	0	0	0
Agamodon compressus	1	0	0	0	0	0	0	0	0
Agamura persica	0	1	0	0	1	1	0	0	0
Agkistrodon bilineatus	0	0	0	1	0	0	1	0	0
Agkistrodon contortrix	0	0	0	0	0	0	1	0	0
Agkistrodon howardgloydi	0	0	0	1	0	0	0	0	0
Agkistrodon piscivorus	0	0	0	0	0	0	1	0	0
Agkistrodon russeolus	0	0	0	0	0	0	1	0	0
Agkistrodon taylori	0	0	0	0	0	0	1	0	0
Ahaetulla dispar	0	0	0	0	0	1	0	0	0
Ahaetulla fasciolata	0	0	0	0	0	0	0	0	1
Ahaetulla fronticincta	0	0	0	0	1	1	0	0	1
Ahaetulla mycterizans	0	0	0	0	0	0	0	0	1
Ahaetulla nasuta	0	0	0	0	1	1	0	0	0
Ahaetulla perroteti	0	0	0	0	0	1	0	0	0
Ahaetulla prasina	0	0	1	0	1	1	0	0	1
Ahaetulla pulverulenta	0	0	0	0	0	1	0	0	0
Ailuronyx seychellensis	1	0	0	0	0	0	0	0	0
Ailuronyx tachyscopaeus	1	0	0	0	0	0	0	0	0
Ailuronyx trachygaster	1	0	0	0	0	0	0	0	0
Aipysurus apraefrontalis	0	0	1	0	0	0	0	0	0
Aipysurus duboisii	0	0	1	0	0	0	0	0	0
Aipysurus eydouxii	0	0	1	0	1	0	0	0	1
Aipysurus foliosquama	0	0	1	0	0	0	0	0	0
Aipysurus fuscus	0	0	1	0	0	0	0	0	1
Aipysurus laevis	0	0	1	0	0	0	0	0	1
Aipysurus mosaicus	0	0	1	0	0	0	0	0	0
Aipysurus tenuis	0	0	1	0	0	0	0	0	0
Alexandresaurus camacan	0	0	0	0	0	0	0	1	0
Algyroides fitzingeri	0	0	0	0	1	0	0	0	0
Algyroides marchi	0	0	0	0	1	0	0	0	0
Algyroides moreoticus	0	0	0	0	1	0	0	0	0
Algyroides nigropunctatus	0	0	0	0	1	0	0	0	0
Alinea berengerae	0	0	0	1	0	0	0	0	0
Alinea lanceolata	0	0	0	1	0	0	0	0	0
Alinea luciae	0	0	0	1	0	0	0	0	0
Alinea pergravis	0	0	0	1	0	0	0	0	0
Alluaudina bellyi	1	0	0	0	0	0	0	0	0
Alluaudina mocquardi	1	0	0	0	0	0	0	0	0
Alopoglossus angulatus	0	0	0	0	0	0	0	1	0
Alopoglossus atriventris	0	0	0	0	0	0	0	1	0
Alopoglossus buckleyi	0	0	0	0	0	0	0	1	0
Alopoglossus copii	0	0	0	0	0	0	0	1	0
Alopoglossus festae	0	0	0	0	0	0	0	1	0
Alopoglossus lehmanni	0	0	0	0	0	0	0	1	0
Alopoglossus viridiceps	0	0	0	0	0	0	0	1	0
Alsophis antiguae	0	0	0	1	0	0	0	0	0
Alsophis antillensis	0	0	0	1	0	0	0	0	0
Alsophis danforthi	0	0	0	1	0	0	0	0	0
Alsophis manselli	0	0	0	1	0	0	0	0	0
Alsophis rijgersmaei	0	0	0	1	0	0	0	0	0
Alsophis rufiventris	0	0	0	1	0	0	0	0	0
Alsophis sajdaki	0	0	0	1	0	0	0	0	0
Alsophis sanctonum	0	0	0	1	0	0	0	0	0
Alsophis sibonius	0	0	0	1	0	0	0	0	0
Alsophylax laevis	0	0	0	0	1	0	0	0	0
Alsophylax loricatus	0	0	0	0	1	0	0	0	0
Alsophylax pipiens	0	0	0	0	1	0	0	0	0
Alsophylax przewalskii	0	0	0	0	1	0	0	0	0
Alsophylax szczerbaki	0	0	0	0	1	0	0	0	0
Alsophylax tadjikiensis	0	0	0	0	1	0	0	0	0
Altiphylax baturensis	0	0	0	0	1	1	0	0	0
Altiphylax levitoni	0	0	0	0	1	0	0	0	0
Altiphylax mintoni	0	0	0	0	1	0	0	0	0
Altiphylax stoliczkai	0	0	0	0	1	1	0	0	0
Altiphylax tokobajevi	0	0	0	0	1	0	0	0	0
Altiphylax yarkandensis	0	0	0	0	1	0	0	0	0
Amalosia jacovae	0	0	1	0	0	0	0	0	0
Amalosia lesueurii	0	0	1	0	0	0	0	0	0
Amalosia obscura	0	0	1	0	0	0	0	0	0
Amalosia rhombifer	0	0	1	0	0	0	0	0	0
Amapasaurus tetradactylus	0	0	0	0	0	0	0	1	0
Amastridium sapperi	0	0	0	1	0	0	1	0	0
Amastridium veliferum	0	0	0	1	0	0	1	0	0
Amblyodipsas concolor	1	0	0	0	0	0	0	0	0
Amblyodipsas dimidiata	1	0	0	0	0	0	0	0	0
Amblyodipsas katangensis	1	0	0	0	0	0	0	0	0
Amblyodipsas microphthalma	1	0	0	0	0	0	0	0	0
Amblyodipsas polylepis	1	0	0	0	0	0	0	0	0
Amblyodipsas rodhaini	1	0	0	0	0	0	0	0	0
Amblyodipsas teitana	1	0	0	0	0	0	0	0	0
Amblyodipsas unicolor	1	0	0	0	0	0	0	0	0
Amblyodipsas ventrimaculata	1	0	0	0	0	0	0	0	0
Amblyrhynchus cristatus	0	0	0	0	0	0	0	1	0
Ameiva aggerecusans	0	0	0	0	0	0	0	1	0
Ameiva ameiva	0	0	0	1	0	0	0	1	0
Ameiva atrata	0	0	0	1	0	0	0	0	0
Ameiva atrigularis	0	0	0	1	0	0	0	1	0
Ameiva auberi	0	0	0	1	0	0	1	0	0
Ameiva bifrontata	0	0	0	1	0	0	0	1	0
Ameiva chrysolaema	0	0	0	1	0	0	0	0	0
Ameiva cineracea	0	0	0	1	0	0	0	0	0
Ameiva concolor	0	0	0	0	0	0	0	1	0
Ameiva corax	0	0	0	1	0	0	0	0	0
Ameiva corvina	0	0	0	1	0	0	0	0	0
Ameiva dorsalis	0	0	0	1	0	0	0	0	0
Ameiva erythrocephala	0	0	0	1	0	0	0	0	0
Ameiva exsul	0	0	0	1	0	0	0	0	0
Ameiva fuscata	0	0	0	1	0	0	0	0	0
Ameiva griswoldi	0	0	0	1	0	0	0	0	0
Ameiva jacuba	0	0	0	0	0	0	0	1	0
Ameiva lineolata	0	0	0	1	0	0	0	0	0
Ameiva major	0	0	0	1	0	0	0	0	0
Ameiva maynardi	0	0	0	0	0	0	1	0	0
Ameiva nodam	0	0	0	0	0	0	0	1	0
Ameiva pantherina	0	0	0	0	0	0	0	1	0
Ameiva parecis	0	0	0	0	0	0	0	1	0
Ameiva plei	0	0	0	1	0	0	0	0	0
Ameiva pluvianotata	0	0	0	1	0	0	0	0	0
Ameiva polops	0	0	0	1	0	0	0	0	0
Ameiva praesignis	0	0	0	0	0	0	0	1	0
Ameiva provitaae	0	0	0	0	0	0	0	1	0
Ameiva taeniura	0	0	0	1	0	0	0	0	0
Ameiva wetmorei	0	0	0	1	0	0	0	0	0
Ameivula abaetensis	0	0	0	0	0	0	0	1	0
Ameivula abalosi	0	0	0	0	0	0	0	1	0
Ameivula cipoensis	0	0	0	0	0	0	0	1	0
Ameivula confusioniba	0	0	0	0	0	0	0	1	0
Ameivula cyanura	0	0	0	0	0	0	0	1	0
Ameivula jalapensis	0	0	0	0	0	0	0	1	0
Ameivula littoralis	0	0	0	0	0	0	0	1	0
Ameivula mumbuca	0	0	0	0	0	0	0	1	0
Ameivula nativo	0	0	0	0	0	0	0	1	0
Ameivula nigrigula	0	0	0	0	0	0	0	1	0
Ameivula ocellifera	0	0	0	0	0	0	0	1	0
Ameivula pyrrhogularis	0	0	0	0	0	0	0	1	0
Ameivula venetacauda	0	0	0	0	0	0	0	1	0
Ameivula xacriaba	0	0	0	0	0	0	0	1	0
Amerotyphlops amoipira	0	0	0	0	0	0	0	1	0
Amerotyphlops brongersmianus	0	0	0	1	0	0	0	1	0
Amerotyphlops costaricensis	0	0	0	1	0	0	0	0	0
Amerotyphlops lehneri	0	0	0	0	0	0	0	1	0
Amerotyphlops microstomus	0	0	0	0	0	0	1	0	0
Amerotyphlops minuisquamus	0	0	0	0	0	0	0	1	0
Amerotyphlops paucisquamus	0	0	0	0	0	0	0	1	0
Amerotyphlops reticulatus	0	0	0	0	0	0	0	1	0
Amerotyphlops stadelmani	0	0	0	1	0	0	0	0	0
Amerotyphlops tasymicris	0	0	0	1	0	0	0	0	0
Amerotyphlops tenuis	0	0	0	0	0	0	1	0	0
Amerotyphlops trinitatus	0	0	0	1	0	0	0	0	0
Amerotyphlops tycherus	0	0	0	1	0	0	0	0	0
Amerotyphlops yonenagae	0	0	0	0	0	0	0	1	0
Amnesteophis melanauchen	0	0	0	0	0	0	0	1	0
Amphibolurus muricatus	0	0	1	0	0	0	0	0	0
Amphibolurus norrisi	0	0	1	0	0	0	0	0	0
Amphiesma stolatum	0	0	0	0	1	1	0	0	1
Amphiesmoides ornaticeps	0	0	0	0	1	0	0	0	0
Amphiglossus alluaudi	1	0	0	0	0	0	0	0	0
Amphiglossus andranovahensis	1	0	0	0	0	0	0	0	0
Amphiglossus anosyensis	1	0	0	0	0	0	0	0	0
Amphiglossus ardouini	1	0	0	0	0	0	0	0	0
Amphiglossus astrolabi	1	0	0	0	0	0	0	0	0
Amphiglossus crenni	1	0	0	0	0	0	0	0	0
Amphiglossus decaryi	1	0	0	0	0	0	0	0	0
Amphiglossus elongatus	1	0	0	0	0	0	0	0	0
Amphiglossus frontoparietalis	1	0	0	0	0	0	0	0	0
Amphiglossus gastrostictus	1	0	0	0	0	0	0	0	0
Amphiglossus johannae	1	0	0	0	0	0	0	0	0
Amphiglossus macrocercus	1	0	0	0	0	0	0	0	0
Amphiglossus mandady	1	0	0	0	0	0	0	0	0
Amphiglossus mandokava	1	0	0	0	0	0	0	0	0
Amphiglossus melanurus	1	0	0	0	0	0	0	0	0
Amphiglossus meva	1	0	0	0	0	0	0	0	0
Amphiglossus ornaticeps	1	0	0	0	0	0	0	0	0
Amphiglossus punctatus	1	0	0	0	0	0	0	0	0
Amphiglossus reticulatus	1	0	0	0	0	0	0	0	0
Amphiglossus spilostichus	1	0	0	0	0	0	0	0	0
Amphiglossus splendidus	1	0	0	0	0	0	0	0	0
Amphiglossus stylus	1	0	0	0	0	0	0	0	0
Amphiglossus tanysoma	1	0	0	0	0	0	0	0	0
Amphiglossus tsaratananensis	1	0	0	0	0	0	0	0	0
Amphiglossus valhallae	1	0	0	0	0	0	0	0	0
Amphisbaena absaberi	0	0	0	0	0	0	0	1	0
Amphisbaena acrobeles	0	0	0	0	0	0	0	1	0
Amphisbaena alba	0	0	0	1	0	0	0	1	0
Amphisbaena albocingulata	0	0	0	0	0	0	0	1	0
Amphisbaena amazonica	0	0	0	0	0	0	0	1	0
Amphisbaena anaemariae	0	0	0	0	0	0	0	1	0
Amphisbaena angustifrons	0	0	0	0	0	0	0	1	0
Amphisbaena anomala	0	0	0	0	0	0	0	1	0
Amphisbaena arda	0	0	0	0	0	0	0	1	0
Amphisbaena arenaria	0	0	0	0	0	0	0	1	0
Amphisbaena bahiana	0	0	0	0	0	0	0	1	0
Amphisbaena bakeri	0	0	0	1	0	0	0	0	0
Amphisbaena barbouri	0	0	0	0	0	0	1	0	0
Amphisbaena bassleri	0	0	0	0	0	0	0	1	0
Amphisbaena bedai	0	0	0	0	0	0	0	1	0
Amphisbaena bilabialatus	0	0	0	0	0	0	0	1	0
Amphisbaena bolivica	0	0	0	0	0	0	0	1	0
Amphisbaena borelli	0	0	0	0	0	0	0	1	0
Amphisbaena brasiliana	0	0	0	0	0	0	0	1	0
Amphisbaena brevis	0	0	0	0	0	0	0	1	0
Amphisbaena caeca	0	0	0	1	0	0	0	0	0
Amphisbaena caiari	0	0	0	0	0	0	0	1	0
Amphisbaena camura	0	0	0	0	0	0	0	1	0
Amphisbaena carlgansi	0	0	0	0	0	0	1	0	0
Amphisbaena carli	0	0	0	0	0	0	0	1	0
Amphisbaena carvalhoi	0	0	0	0	0	0	0	1	0
Amphisbaena caudalis	0	0	0	1	0	0	0	0	0
Amphisbaena cayemite	0	0	0	1	0	0	0	0	0
Amphisbaena cegei	0	0	0	0	0	0	0	1	0
Amphisbaena cerradensis	0	0	0	0	0	0	0	1	0
Amphisbaena crisae	0	0	0	0	0	0	0	1	0
Amphisbaena cubana	0	0	0	1	0	0	1	0	0
Amphisbaena cuiabana	0	0	0	0	0	0	0	1	0
Amphisbaena cunhai	0	0	0	0	0	0	0	1	0
Amphisbaena darwini	0	0	0	0	0	0	0	1	0
Amphisbaena dubia	0	0	0	0	0	0	0	1	0
Amphisbaena fenestrata	0	0	0	1	0	0	0	0	0
Amphisbaena frontalis	0	0	0	0	0	0	0	1	0
Amphisbaena fuliginosa	0	0	0	1	0	0	0	1	0
Amphisbaena gonavensis	0	0	0	1	0	0	0	0	0
Amphisbaena gracilis	0	0	0	0	0	0	0	1	0
Amphisbaena hastata	0	0	0	0	0	0	0	1	0
Amphisbaena heathi	0	0	0	0	0	0	0	1	0
Amphisbaena heterozonata	0	0	0	0	0	0	0	1	0
Amphisbaena hiata	0	0	0	0	0	0	0	1	0
Amphisbaena hogei	0	0	0	0	0	0	0	1	0
Amphisbaena hyporissor	0	0	0	1	0	0	0	0	0
Amphisbaena ibijara	0	0	0	0	0	0	0	1	0
Amphisbaena ignatiana	0	0	0	0	0	0	0	1	0
Amphisbaena infraorbitale	0	0	0	0	0	0	0	1	0
Amphisbaena innocens	0	0	0	1	0	0	0	0	0
Amphisbaena kingii	0	0	0	0	0	0	0	1	0
Amphisbaena kisteumacheri	0	0	0	0	0	0	0	1	0
Amphisbaena kraoh	0	0	0	0	0	0	0	1	0
Amphisbaena leali	0	0	0	1	0	0	0	0	0
Amphisbaena leeseri	0	0	0	0	0	0	0	1	0
Amphisbaena leucocephala	0	0	0	0	0	0	0	1	0
Amphisbaena littoralis	0	0	0	0	0	0	0	1	0
Amphisbaena lumbricalis	0	0	0	0	0	0	0	1	0
Amphisbaena manni	0	0	0	1	0	0	0	0	0
Amphisbaena maranhensis	0	0	0	0	0	0	0	1	0
Amphisbaena maximus	0	0	0	0	0	0	0	1	0
Amphisbaena medemi	0	0	0	0	0	0	0	1	0
Amphisbaena mensae	0	0	0	0	0	0	0	1	0
Amphisbaena mertensii	0	0	0	0	0	0	0	1	0
Amphisbaena microcephalum	0	0	0	0	0	0	0	1	0
Amphisbaena miringoera	0	0	0	0	0	0	0	1	0
Amphisbaena mitchelli	0	0	0	0	0	0	0	1	0
Amphisbaena munoai	0	0	0	0	0	0	0	1	0
Amphisbaena myersi	0	0	0	0	0	0	0	1	0
Amphisbaena neglecta	0	0	0	0	0	0	0	1	0
Amphisbaena nigricauda	0	0	0	0	0	0	0	1	0
Amphisbaena occidentalis	0	0	0	0	0	0	0	1	0
Amphisbaena octostegum	0	0	0	0	0	0	0	1	0
Amphisbaena pericensis	0	0	0	0	0	0	0	1	0
Amphisbaena persephone	0	0	0	0	0	0	0	1	0
Amphisbaena plumbea	0	0	0	0	0	0	0	1	0
Amphisbaena polygrammica	0	0	0	0	0	0	0	1	0
Amphisbaena polystegum	0	0	0	0	0	0	0	1	0
Amphisbaena pretrei	0	0	0	0	0	0	0	1	0
Amphisbaena prunicolor	0	0	0	0	0	0	0	1	0
Amphisbaena ridleyi	0	0	0	0	0	0	0	1	0
Amphisbaena roberti	0	0	0	0	0	0	0	1	0
Amphisbaena rozei	0	0	0	0	0	0	0	1	0
Amphisbaena sanctaeritae	0	0	0	0	0	0	0	1	0
Amphisbaena saxosa	0	0	0	0	0	0	0	1	0
Amphisbaena schmidti	0	0	0	1	0	0	0	0	0
Amphisbaena scutigerum	0	0	0	0	0	0	0	1	0
Amphisbaena silvestrii	0	0	0	0	0	0	0	1	0
Amphisbaena slateri	0	0	0	0	0	0	0	1	0
Amphisbaena slevini	0	0	0	0	0	0	0	1	0
Amphisbaena spurelli	0	0	0	0	0	0	0	1	0
Amphisbaena steindachneri	0	0	0	0	0	0	0	1	0
Amphisbaena stejnegeri	0	0	0	0	0	0	0	1	0
Amphisbaena supernumeraria	0	0	0	0	0	0	0	1	0
Amphisbaena talisiae	0	0	0	0	0	0	0	1	0
Amphisbaena townsendi	0	0	0	0	0	0	0	1	0
Amphisbaena trachura	0	0	0	0	0	0	0	1	0
Amphisbaena tragorrhectes	0	0	0	0	0	0	0	1	0
Amphisbaena uroxena	0	0	0	0	0	0	0	1	0
Amphisbaena vanzolinii	0	0	0	0	0	0	0	1	0
Amphisbaena varia	0	0	0	1	0	0	0	1	0
Amphisbaena vermicularis	0	0	0	0	0	0	0	1	0
Amphisbaena wiedi	0	0	0	0	0	0	0	1	0
Amphisbaena wuchereri	0	0	0	0	0	0	0	1	0
Amphisbaena xera	0	0	0	1	0	0	0	0	0
Amplorhinus multimaculatus	1	0	0	0	0	0	0	0	0
Anadia altaserrania	0	0	0	0	0	0	0	1	0
Anadia antioquensis	0	0	0	0	0	0	0	1	0
Anadia bitaeniata	0	0	0	0	0	0	0	1	0
Anadia blakei	0	0	0	0	0	0	0	1	0
Anadia bogotensis	0	0	0	0	0	0	0	1	0
Anadia brevifrontalis	0	0	0	0	0	0	0	1	0
Anadia bumanguesa	0	0	0	0	0	0	0	1	0
Anadia escalerae	0	0	0	0	0	0	0	1	0
Anadia hobarti	0	0	0	0	0	0	0	1	0
Anadia marmorata	0	0	0	0	0	0	0	1	0
Anadia mcdiarmidi	0	0	0	0	0	0	0	1	0
Anadia ocellata	0	0	0	1	0	0	0	1	0
Anadia pamplonensis	0	0	0	0	0	0	0	1	0
Anadia pariaensis	0	0	0	1	0	0	0	0	0
Anadia petersi	0	0	0	0	0	0	0	1	0
Anadia pulchella	0	0	0	0	0	0	0	1	0
Anadia rhombifera	0	0	0	0	0	0	0	1	0
Anadia steyeri	0	0	0	0	0	0	0	1	0
Anadia vittata	0	0	0	1	0	0	0	1	0
Anatololacerta anatolica	0	0	0	0	1	0	0	0	0
Anatololacerta budaki	0	0	0	0	1	0	0	0	0
Anatololacerta danfordi	0	0	0	0	1	0	0	0	0
Anatololacerta pelasgiana	0	0	0	0	1	0	0	0	0
Ancylocranium barkeri	1	0	0	0	0	0	0	0	0
Ancylocranium ionidesi	1	0	0	0	0	0	0	0	0
Ancylocranium somalicum	1	0	0	0	0	0	0	0	0
Androngo trivittatus	1	0	0	0	0	0	0	0	0
Anelytropsis papillosus	0	0	0	0	0	0	1	0	0
Anepischetosia maccoyi	0	0	1	0	0	0	0	0	0
Anguis cephallonica	0	0	0	0	1	0	0	0	0
Anguis colchica	0	0	0	0	1	0	0	0	0
Anguis fragilis	0	0	0	0	1	0	0	0	0
Anguis graeca	0	0	0	0	1	0	0	0	0
Anguis incomptus	0	0	0	0	0	0	1	0	0
Anguis veronensis	0	0	0	0	1	0	0	0	0
Anilios affinis	0	0	1	0	0	0	0	0	0
Anilios ammodytes	0	0	1	0	0	0	0	0	0
Anilios aspinus	0	0	1	0	0	0	0	0	0
Anilios australis	0	0	1	0	0	0	0	0	0
Anilios batillus	0	0	1	0	0	0	0	0	0
Anilios bicolor	0	0	1	0	0	0	0	0	0
Anilios bituberculatus	0	0	1	0	0	0	0	0	0
Anilios broomi	0	0	1	0	0	0	0	0	0
Anilios centralis	0	0	1	0	0	0	0	0	0
Anilios chamodracaena	0	0	1	0	0	0	0	0	0
Anilios diversus	0	0	1	0	0	0	0	0	0
Anilios endoterus	0	0	1	0	0	0	0	0	0
Anilios erycinus	0	0	1	0	0	0	0	0	0
Anilios ganei	0	0	1	0	0	0	0	0	0
Anilios grypus	0	0	1	0	0	0	0	0	0
Anilios guentheri	0	0	1	0	0	0	0	0	0
Anilios hamatus	0	0	1	0	0	0	0	0	0
Anilios howi	0	0	1	0	0	0	0	0	0
Anilios kimberleyensis	0	0	1	0	0	0	0	0	0
Anilios leptosomus	0	0	1	0	0	0	0	0	0
Anilios leucoproctus	0	0	1	0	0	0	0	0	0
Anilios ligatus	0	0	1	0	0	0	0	0	0
Anilios longissimus	0	0	1	0	0	0	0	0	0
Anilios margaretae	0	0	1	0	0	0	0	0	0
Anilios micrommus	0	0	1	0	0	0	0	0	0
Anilios minimus	0	0	1	0	0	0	0	0	0
Anilios nema	0	0	1	0	0	0	0	0	0
Anilios nigrescens	0	0	1	0	0	0	0	0	0
Anilios nigricaudus	1	0	0	0	0	0	0	0	0
Anilios nigroterminatus	0	0	1	0	0	0	0	0	0
Anilios pilbarensis	0	0	1	0	0	0	0	0	0
Anilios pinguis	0	0	1	0	0	0	0	0	0
Anilios polygrammicus	0	0	1	0	0	0	0	0	0
Anilios proximus	0	0	1	0	0	0	0	0	0
Anilios robertsi	0	0	1	0	0	0	0	0	0
Anilios silvia	0	0	1	0	0	0	0	0	0
Anilios splendidus	0	0	1	0	0	0	0	0	0
Anilios torresianus	0	0	1	0	0	0	0	0	0
Anilios tovelli	0	0	1	0	0	0	0	0	0
Anilios troglodytes	0	0	1	0	0	0	0	0	0
Anilios unguirostris	0	0	1	0	0	0	0	0	0
Anilios waitii	0	0	1	0	0	0	0	0	0
Anilios wiedii	0	0	1	0	0	0	0	0	0
Anilios yampiensis	0	0	1	0	0	0	0	0	0
Anilios yirrikalae	0	0	1	0	0	0	0	0	0
Anilius scytale	0	0	0	0	0	0	0	1	0
Anisolepis grilli	0	0	0	0	0	0	0	1	0
Anisolepis longicauda	0	0	0	0	0	0	0	1	0
Anisolepis undulatus	0	0	0	0	0	0	0	1	0
Anniella alexanderae	0	0	0	0	0	0	1	0	0
Anniella campi	0	0	0	0	0	0	1	0	0
Anniella geronimensis	0	0	0	0	0	0	1	0	0
Anniella grinnelli	0	0	0	0	0	0	1	0	0
Anniella pulchra	0	0	0	0	0	0	1	0	0
Anniella stebbinsi	0	0	0	0	0	0	1	0	0
Anolis acutus	0	0	0	1	0	0	0	0	0
Anolis aeneus	0	0	0	1	0	0	0	1	0
Anolis aequatorialis	0	0	0	0	0	0	0	1	0
Anolis agassizi	0	0	0	0	0	0	0	1	0
Anolis agueroi	0	0	0	0	0	0	1	0	0
Anolis ahli	0	0	0	0	0	0	1	0	0
Anolis alayoni	0	0	0	1	0	0	1	0	0
Anolis alfaroi	0	0	0	0	0	0	1	0	0
Anolis aliniger	0	0	0	1	0	0	0	0	0
Anolis allisoni	0	0	0	1	0	0	1	0	0
Anolis allogus	0	0	0	1	0	0	1	0	0
Anolis altae	0	0	0	1	0	0	0	0	0
Anolis altavelensis	0	0	0	1	0	0	0	0	0
Anolis altitudinalis	0	0	0	0	0	0	1	0	0
Anolis alumina	0	0	0	1	0	0	0	0	0
Anolis alutaceus	0	0	0	1	0	0	1	0	0
Anolis alvarezdeltoroi	0	0	0	0	0	0	1	0	0
Anolis amplisquamosus	0	0	0	1	0	0	0	0	0
Anolis anatoloros	0	0	0	0	0	0	0	1	0
Anolis anchicayae	0	0	0	0	0	0	0	1	0
Anolis anfiloquioi	0	0	0	1	0	0	1	0	0
Anolis angusticeps	0	0	0	1	0	0	1	0	0
Anolis anisolepis	0	0	0	0	0	0	1	0	0
Anolis annectens	0	0	0	0	0	0	0	1	0
Anolis anoriensis	0	0	0	0	0	0	0	1	0
Anolis antioquiae	0	0	0	0	0	0	0	1	0
Anolis antonii	0	0	0	0	0	0	0	1	0
Anolis apletophallus	0	0	0	1	0	0	0	1	0
Anolis apollinaris	0	0	0	0	0	0	0	1	0
Anolis aquaticus	0	0	0	1	0	0	0	0	0
Anolis argenteolus	0	0	0	1	0	0	1	0	0
Anolis argillaceus	0	0	0	1	0	0	1	0	0
Anolis armouri	0	0	0	1	0	0	0	0	0
Anolis auratus	0	0	0	1	0	0	0	1	0
Anolis bahorucoensis	0	0	0	1	0	0	0	0	0
Anolis baleatus	0	0	0	1	0	0	0	0	0
Anolis baracoae	0	0	0	1	0	0	1	0	0
Anolis barahonae	0	0	0	1	0	0	0	0	0
Anolis barbatus	0	0	0	0	0	0	1	0	0
Anolis barbouri	0	0	0	1	0	0	0	0	0
Anolis barkeri	0	0	0	0	0	0	1	0	0
Anolis bartschi	0	0	0	0	0	0	1	0	0
Anolis beckeri	0	0	0	1	0	0	1	0	0
Anolis bellipeniculus	0	0	0	0	0	0	0	1	0
Anolis benedikti	0	0	0	1	0	0	0	0	0
Anolis bicaorum	0	0	0	1	0	0	0	0	0
Anolis bimaculatus	0	0	0	1	0	0	0	0	0
Anolis binotatus	0	0	0	0	0	0	0	1	0
Anolis biporcatus	0	0	0	1	0	0	1	1	0
Anolis birama	0	0	0	0	0	0	1	0	0
Anolis bitectus	0	0	0	0	0	0	0	1	0
Anolis blanquillanus	0	0	0	1	0	0	0	0	0
Anolis boettgeri	0	0	0	0	0	0	0	1	0
Anolis bombiceps	0	0	0	0	0	0	0	1	0
Anolis bonairensis	0	0	0	1	0	0	0	1	0
Anolis boulengerianus	0	0	0	0	0	0	1	0	0
Anolis brasiliensis	0	0	0	0	0	0	0	1	0
Anolis bremeri	0	0	0	0	0	0	1	0	0
Anolis breslini	0	0	0	1	0	0	0	0	0
Anolis brevirostris	0	0	0	1	0	0	0	0	0
Anolis brunneus	0	0	0	0	0	0	1	0	0
Anolis calimae	0	0	0	0	0	0	0	1	0
Anolis campbelli	0	0	0	0	0	0	1	0	0
Anolis capito	0	0	0	1	0	0	1	1	0
Anolis caquetae	0	0	0	0	0	0	0	1	0
Anolis carlliebi	0	0	0	0	0	0	1	0	0
Anolis carlostoddi	0	0	0	0	0	0	0	1	0
Anolis carolinensis	0	0	0	0	0	0	1	0	0
Anolis carpenteri	0	0	0	1	0	0	0	0	0
Anolis casildae	0	0	0	1	0	0	0	0	0
Anolis caudalis	0	0	0	1	0	0	0	0	0
Anolis centralis	0	0	0	1	0	0	1	0	0
Anolis chamaeleonides	0	0	0	0	0	0	1	0	0
Anolis charlesmyersi	0	0	0	1	0	0	0	0	0
Anolis chloris	0	0	0	1	0	0	0	1	0
Anolis chlorocyanus	0	0	0	1	0	0	0	0	0
Anolis chocorum	0	0	0	1	0	0	0	1	0
Anolis christophei	0	0	0	1	0	0	0	0	0
Anolis chrysolepis	0	0	0	1	0	0	0	1	0
Anolis chrysops	0	0	0	1	0	0	0	0	0
Anolis clivicola	0	0	0	0	0	0	1	0	0
Anolis cobanensis	0	0	0	1	0	0	1	0	0
Anolis coelestinus	0	0	0	1	0	0	0	0	0
Anolis compressicauda	0	0	0	0	0	0	1	0	0
Anolis concolor	0	0	0	1	0	0	0	0	0
Anolis confusus	0	0	0	0	0	0	1	0	0
Anolis conspersus	0	0	0	0	0	0	1	0	0
Anolis cooki	0	0	0	1	0	0	0	0	0
Anolis crassulus	0	0	0	1	0	0	1	0	0
Anolis cristatellus	0	0	0	1	0	0	0	0	0
Anolis cristifer	0	0	0	0	0	0	1	0	0
Anolis cryptolimifrons	0	0	0	1	0	0	0	0	0
Anolis cupeyalensis	0	0	0	0	0	0	1	0	0
Anolis cupreus	0	0	0	1	0	0	0	0	0
Anolis cuprinus	0	0	0	0	0	0	1	0	0
Anolis cuscoensis	0	0	0	0	0	0	0	1	0
Anolis cusuco	0	0	0	1	0	0	0	0	0
Anolis cuvieri	0	0	0	1	0	0	0	0	0
Anolis cyanopleurus	0	0	0	1	0	0	1	0	0
Anolis cybotes	0	0	0	1	0	0	0	0	0
Anolis cymbops	0	0	0	0	0	0	1	0	0
Anolis damulus	0	0	0	0	0	0	1	0	0
Anolis danieli	0	0	0	0	0	0	0	1	0
Anolis darlingtoni	0	0	0	1	0	0	0	0	0
Anolis datzorum	0	0	0	1	0	0	0	0	0
Anolis delafuentei	0	0	0	0	0	0	1	0	0
Anolis deltae	0	0	0	1	0	0	0	1	0
Anolis desechensis	0	0	0	1	0	0	0	0	0
Anolis desiradei	0	0	0	1	0	0	0	0	0
Anolis dissimilis	0	0	0	0	0	0	0	1	0
Anolis distichus	0	0	0	1	0	0	1	0	0
Anolis dolichocephalus	0	0	0	1	0	0	0	0	0
Anolis dollfusianus	0	0	0	0	0	0	1	0	0
Anolis duellmani	0	0	0	0	0	0	1	0	0
Anolis dunni	0	0	0	0	0	0	1	0	0
Anolis eewi	0	0	0	0	0	0	0	1	0
Anolis equestris	0	0	0	0	0	0	1	0	0
Anolis ernestwilliamsi	0	0	0	1	0	0	0	0	0
Anolis etheridgei	0	0	0	1	0	0	0	0	0
Anolis eugenegrahami	0	0	0	1	0	0	0	0	0
Anolis eulaemus	0	0	0	0	0	0	0	1	0
Anolis euskalerriari	0	0	0	0	0	0	0	1	0
Anolis evermanni	0	0	0	1	0	0	0	0	0
Anolis extremus	0	0	0	1	0	0	0	1	0
Anolis fairchildi	0	0	0	0	0	0	1	0	0
Anolis fasciatus	0	0	0	0	0	0	0	1	0
Anolis ferreus	0	0	0	1	0	0	0	0	0
Anolis festae	0	0	0	0	0	0	0	1	0
Anolis fitchi	0	0	0	0	0	0	0	1	0
Anolis forresti	0	0	0	1	0	0	0	0	0
Anolis fortunensis	0	0	0	1	0	0	0	0	0
Anolis fowleri	0	0	0	1	0	0	0	0	0
Anolis fraseri	0	0	0	0	0	0	0	1	0
Anolis frenatus	0	0	0	1	0	0	0	1	0
Anolis fugitivus	0	0	0	0	0	0	1	0	0
Anolis fungosus	0	0	0	1	0	0	0	0	0
Anolis fuscoauratus	0	0	0	1	0	0	0	1	0
Anolis gadovii	0	0	0	0	0	0	1	0	0
Anolis gaigei	0	0	0	1	0	0	0	1	0
Anolis garmani	0	0	0	1	0	0	1	0	0
Anolis garridoi	0	0	0	0	0	0	1	0	0
Anolis gemmosus	0	0	0	0	0	0	0	1	0
Anolis gibbiceps	0	0	0	1	0	0	0	1	0
Anolis ginaelisae	0	0	0	1	0	0	0	0	0
Anolis gingivinus	0	0	0	1	0	0	0	0	0
Anolis gorgonae	0	0	0	0	0	0	0	1	0
Anolis gracilipes	0	0	0	1	0	0	0	1	0
Anolis grahami	0	0	0	1	0	0	0	0	0
Anolis granuliceps	0	0	0	0	0	0	0	1	0
Anolis griseus	0	0	0	1	0	0	0	0	0
Anolis gruuo	0	0	0	1	0	0	0	0	0
Anolis guafe	0	0	0	0	0	0	1	0	0
Anolis guamuhaya	0	0	0	0	0	0	1	0	0
Anolis guazuma	0	0	0	0	0	0	1	0	0
Anolis gundlachi	0	0	0	1	0	0	0	0	0
Anolis haetianus	0	0	0	1	0	0	0	0	0
Anolis haguei	0	0	0	0	0	0	1	0	0
Anolis hendersoni	0	0	0	1	0	0	0	0	0
Anolis heterodermus	0	0	0	0	0	0	0	1	0
Anolis hobartsmithi	0	0	0	0	0	0	1	0	0
Anolis homolechis	0	0	0	1	0	0	1	0	0
Anolis huilae	0	0	0	0	0	0	0	1	0
Anolis humilis	0	0	0	1	0	0	0	1	0
Anolis ibague	0	0	0	0	0	0	0	1	0
Anolis ibanezi	0	0	0	1	0	0	0	0	0
Anolis imias	0	0	0	1	0	0	1	0	0
Anolis immaculogularis	0	0	0	0	0	0	1	0	0
Anolis impetigosus	0	0	0	0	0	0	0	1	0
Anolis incredulus	0	0	0	0	0	0	1	0	0
Anolis inderenae	0	0	0	0	0	0	0	1	0
Anolis inexpectatus	0	0	0	0	0	0	1	0	0
Anolis insignis	0	0	0	1	0	0	0	1	0
Anolis insolitus	0	0	0	1	0	0	0	0	0
Anolis intermedius	0	0	0	1	0	0	0	0	0
Anolis isolepis	0	0	0	1	0	0	1	0	0
Anolis jacare	0	0	0	0	0	0	0	1	0
Anolis johnmeyeri	0	0	0	1	0	0	0	0	0
Anolis juangundlachi	0	0	0	0	0	0	1	0	0
Anolis jubar	0	0	0	1	0	0	1	0	0
Anolis kahouannensis	0	0	0	1	0	0	0	0	0
Anolis kemptoni	0	0	0	1	0	0	0	0	0
Anolis koopmani	0	0	0	1	0	0	0	0	0
Anolis kreutzi	0	0	0	1	0	0	0	0	0
Anolis krugi	0	0	0	1	0	0	0	0	0
Anolis kunayalae	0	0	0	1	0	0	0	0	0
Anolis laevis	0	0	0	0	0	0	0	1	0
Anolis laeviventris	0	0	0	1	0	0	1	0	0
Anolis lamari	0	0	0	0	0	0	0	1	0
Anolis latifrons	0	0	0	1	0	0	0	1	0
Anolis leachii	0	0	0	1	0	0	0	0	0
Anolis lemniscatus	0	0	0	0	0	0	0	1	0
Anolis lemurinus	0	0	0	1	0	0	1	1	0
Anolis limifrons	0	0	0	1	0	0	0	1	0
Anolis limon	0	0	0	0	0	0	0	1	0
Anolis lineatopus	0	0	0	1	0	0	0	0	0
Anolis lineatus	0	0	0	1	0	0	0	1	0
Anolis liogaster	0	0	0	0	0	0	1	0	0
Anolis lionotus	0	0	0	1	0	0	1	1	0
Anolis litoralis	0	0	0	1	0	0	1	0	0
Anolis lividus	0	0	0	1	0	0	0	0	0
Anolis longiceps	0	0	0	1	0	0	0	0	0
Anolis longitibialis	0	0	0	1	0	0	0	0	0
Anolis loveridgei	0	0	0	1	0	0	0	0	0
Anolis loysiana	0	0	0	0	0	0	1	0	0
Anolis luciae	0	0	0	1	0	0	0	1	0
Anolis lucius	0	0	0	0	0	0	1	0	0
Anolis luteogularis	0	0	0	0	0	0	1	0	0
Anolis luteosignifer	0	0	0	0	0	0	1	0	0
Anolis lynchi	0	0	0	0	0	0	0	1	0
Anolis lyra	0	0	0	0	0	0	0	1	0
Anolis macilentus	0	0	0	0	0	0	1	0	0
Anolis macrinii	0	0	0	0	0	0	1	0	0
Anolis macrolepis	0	0	0	0	0	0	0	1	0
Anolis macrophallus	0	0	0	1	0	0	1	0	0
Anolis maculigula	0	0	0	0	0	0	0	1	0
Anolis maculiventris	0	0	0	1	0	0	0	1	0
Anolis magnaphallus	0	0	0	1	0	0	0	0	0
Anolis marcanoi	0	0	0	1	0	0	0	0	0
Anolis mariarum	0	0	0	0	0	0	0	1	0
Anolis marmoratus	0	0	0	1	0	0	0	0	0
Anolis marron	0	0	0	1	0	0	0	0	0
Anolis matudai	0	0	0	0	0	0	1	0	0
Anolis maynardi	0	0	0	0	0	0	1	0	0
Anolis medemi	0	0	0	0	0	0	0	1	0
Anolis megalopithecus	0	0	0	0	0	0	0	1	0
Anolis megapholidotus	0	0	0	0	0	0	1	0	0
Anolis menta	0	0	0	0	0	0	0	1	0
Anolis meridionalis	0	0	0	0	0	0	0	1	0
Anolis mestrei	0	0	0	0	0	0	1	0	0
Anolis microlepidotus	0	0	0	0	0	0	1	0	0
Anolis microlepis	0	0	0	0	0	0	1	0	0
Anolis microtus	0	0	0	1	0	0	0	0	0
Anolis milleri	0	0	0	0	0	0	1	0	0
Anolis mirus	0	0	0	0	0	0	0	1	0
Anolis monensis	0	0	0	1	0	0	0	0	0
Anolis monteverde	0	0	0	1	0	0	0	0	0
Anolis monticola	0	0	0	1	0	0	0	0	0
Anolis morazani	0	0	0	1	0	0	0	0	0
Anolis muralla	0	0	0	1	0	0	0	0	0
Anolis nasofrontalis	0	0	0	0	0	0	0	1	0
Anolis naufragus	0	0	0	0	0	0	1	0	0
Anolis neblininus	0	0	0	0	0	0	0	1	0
Anolis nebuloides	0	0	0	0	0	0	1	0	0
Anolis nebulosus	0	0	0	0	0	0	1	0	0
Anolis nelsoni	0	0	0	1	0	0	1	0	0
Anolis nicefori	0	0	0	0	0	0	0	1	0
Anolis nietoi	0	0	0	0	0	0	1	0	0
Anolis nigrolineatus	0	0	0	0	0	0	0	1	0
Anolis noblei	0	0	0	1	0	0	1	0	0
Anolis notopholis	0	0	0	0	0	0	0	1	0
Anolis nubilus	0	0	0	1	0	0	0	0	0
Anolis occultus	0	0	0	1	0	0	0	0	0
Anolis ocelloscapularis	0	0	0	1	0	0	0	0	0
Anolis oculatus	0	0	0	1	0	0	0	0	0
Anolis oligaspis	0	0	0	0	0	0	1	0	0
Anolis olssoni	0	0	0	1	0	0	0	0	0
Anolis omiltemanus	0	0	0	0	0	0	1	0	0
Anolis onca	0	0	0	1	0	0	0	1	0
Anolis opalinus	0	0	0	1	0	0	0	0	0
Anolis ophiolepis	0	0	0	0	0	0	1	0	0
Anolis oporinus	0	0	0	0	0	0	1	0	0
Anolis orcesi	0	0	0	0	0	0	0	1	0
Anolis ordinatus	0	0	0	0	0	0	1	0	0
Anolis ortonii	0	0	0	0	0	0	0	1	0
Anolis osa	0	0	0	1	0	0	0	0	0
Anolis otongae	0	0	0	0	0	0	0	1	0
Anolis oxylophus	0	0	0	1	0	0	0	0	0
Anolis pachypus	0	0	0	1	0	0	0	0	0
Anolis paravertebralis	0	0	0	0	0	0	0	1	0
Anolis parilis	0	0	0	0	0	0	0	1	0
Anolis parvicirculatus	0	0	0	0	0	0	1	0	0
Anolis paternus	0	0	0	0	0	0	1	0	0
Anolis pentaprion	0	0	0	1	0	0	1	1	0
Anolis peraccae	0	0	0	0	0	0	0	1	0
Anolis petersii	0	0	0	1	0	0	1	0	0
Anolis peucephilus	0	0	0	0	0	0	1	0	0
Anolis philopunctatus	0	0	0	0	0	0	0	1	0
Anolis phyllorhinus	0	0	0	0	0	0	0	1	0
Anolis pigmaequestris	0	0	0	0	0	0	1	0	0
Anolis pijolense	0	0	0	1	0	0	0	0	0
Anolis pinchoti	0	0	0	1	0	0	0	0	0
Anolis placidus	0	0	0	1	0	0	0	0	0
Anolis planiceps	0	0	0	1	0	0	0	1	0
Anolis podocarpus	0	0	0	0	0	0	0	1	0
Anolis poecilopus	0	0	0	1	0	0	0	1	0
Anolis poei	0	0	0	0	0	0	0	1	0
Anolis pogus	0	0	0	1	0	0	0	0	0
Anolis polylepis	0	0	0	1	0	0	0	0	0
Anolis poncensis	0	0	0	1	0	0	0	0	0
Anolis porcatus	0	0	0	1	0	0	1	0	0
Anolis porcus	0	0	0	1	0	0	1	0	0
Anolis princeps	0	0	0	0	0	0	0	1	0
Anolis proboscis	0	0	0	0	0	0	0	1	0
Anolis propinquus	0	0	0	0	0	0	0	1	0
Anolis pseudokemptoni	0	0	0	1	0	0	0	0	0
Anolis pseudopachypus	0	0	0	1	0	0	0	0	0
Anolis pseudotigrinus	0	0	0	0	0	0	0	1	0
Anolis pulchellus	0	0	0	1	0	0	0	0	0
Anolis pumilus	0	0	0	0	0	0	1	0	0
Anolis punctatus	0	0	0	0	0	0	0	1	0
Anolis purpurescens	0	0	0	0	0	0	0	1	0
Anolis purpurgularis	0	0	0	1	0	0	0	0	0
Anolis pygmaeus	0	0	0	0	0	0	1	0	0
Anolis quadriocellifer	0	0	0	0	0	0	1	0	0
Anolis quaggulus	0	0	0	1	0	0	0	0	0
Anolis quercorum	0	0	0	0	0	0	1	0	0
Anolis radulinus	0	0	0	0	0	0	0	1	0
Anolis reconditus	0	0	0	1	0	0	0	0	0
Anolis rejectus	0	0	0	1	0	0	1	0	0
Anolis rhombifer	0	0	0	1	0	0	0	0	0
Anolis richardii	0	0	0	1	0	0	0	0	0
Anolis ricordii	0	0	0	1	0	0	0	0	0
Anolis rimarum	0	0	0	1	0	0	0	0	0
Anolis rivalis	0	0	0	0	0	0	0	1	0
Anolis roatanensis	0	0	0	1	0	0	0	0	0
Anolis rodriguezi	0	0	0	1	0	0	0	0	0
Anolis roosevelti	0	0	0	1	0	0	0	0	0
Anolis roquet	0	0	0	1	0	0	0	0	0
Anolis rubiginosus	0	0	0	0	0	0	1	0	0
Anolis rubribarbaris	0	0	0	1	0	0	0	0	0
Anolis rubribarbus	0	0	0	0	0	0	1	0	0
Anolis ruibali	0	0	0	0	0	0	1	0	0
Anolis ruizii	0	0	0	0	0	0	0	1	0
Anolis rupinae	0	0	0	1	0	0	0	0	0
Anolis sabanus	0	0	0	1	0	0	0	0	0
Anolis sacamecatensis	0	0	0	0	0	0	1	0	0
Anolis sagrei	0	0	0	1	0	0	1	0	0
Anolis salvini	0	0	0	1	0	0	0	0	0
Anolis santamartae	0	0	0	0	0	0	0	1	0
Anolis scapularis	0	0	0	0	0	0	0	1	0
Anolis schiedii	0	0	0	0	0	0	1	0	0
Anolis schwartzi	0	0	0	1	0	0	0	0	0
Anolis scriptus	0	0	0	0	0	0	1	0	0
Anolis scypheus	0	0	0	0	0	0	0	1	0
Anolis semilineatus	0	0	0	1	0	0	0	0	0
Anolis sericeus	0	0	0	1	0	0	1	0	0
Anolis serranoi	0	0	0	1	0	0	1	1	0
Anolis sheplani	0	0	0	1	0	0	0	0	0
Anolis shrevei	0	0	0	1	0	0	0	0	0
Anolis sierramaestrae	0	0	0	0	0	0	1	0	0
Anolis singularis	0	0	0	1	0	0	0	0	0
Anolis smallwoodi	0	0	0	1	0	0	1	0	0
Anolis smaragdinus	0	0	0	0	0	0	1	0	0
Anolis sminthus	0	0	0	1	0	0	0	0	0
Anolis soinii	0	0	0	0	0	0	0	1	0
Anolis solitarius	0	0	0	0	0	0	0	1	0
Anolis spectrum	0	0	0	0	0	0	1	0	0
Anolis squamulatus	0	0	0	0	0	0	0	1	0
Anolis stevepoei	0	0	0	0	0	0	1	0	0
Anolis strahmi	0	0	0	1	0	0	0	0	0
Anolis stratulus	0	0	0	1	0	0	0	0	0
Anolis subocularis	0	0	0	0	0	0	1	0	0
Anolis sulcifrons	0	0	0	0	0	0	0	1	0
Anolis tandai	0	0	0	0	0	0	0	1	0
Anolis taylori	0	0	0	0	0	0	1	0	0
Anolis tenorioensis	0	0	0	1	0	0	0	0	0
Anolis terraealtae	0	0	0	1	0	0	0	0	0
Anolis terueli	0	0	0	0	0	0	1	0	0
Anolis tetarii	0	0	0	0	0	0	0	1	0
Anolis tigrinus	0	0	0	1	0	0	0	1	0
Anolis toldo	0	0	0	0	0	0	1	0	0
Anolis tolimensis	0	0	0	0	0	0	0	1	0
Anolis townsendi	0	0	0	0	0	0	1	0	0
Anolis trachyderma	0	0	0	0	0	0	0	1	0
Anolis transversalis	0	0	0	0	0	0	0	1	0
Anolis trinitatis	0	0	0	1	0	0	0	0	0
Anolis tropidogaster	0	0	0	1	0	0	0	1	0
Anolis tropidolepis	0	0	0	1	0	0	0	0	0
Anolis tropidonotus	0	0	0	1	0	0	1	0	0
Anolis umbrivagus	0	0	0	0	0	0	0	1	0
Anolis uniformis	0	0	0	1	0	0	1	0	0
Anolis unilobatus	0	0	0	1	0	0	1	0	0
Anolis utilensis	0	0	0	1	0	0	0	0	0
Anolis valencienni	0	0	0	1	0	0	0	0	0
Anolis vanidicus	0	0	0	0	0	0	1	0	0
Anolis vanzolinii	0	0	0	0	0	0	0	1	0
Anolis vaupesianus	0	0	0	0	0	0	0	1	0
Anolis ventrimaculatus	0	0	0	0	0	0	0	1	0
Anolis vermiculatus	0	0	0	0	0	0	1	0	0
Anolis vescus	0	0	0	0	0	0	1	0	0
Anolis vicarius	0	0	0	0	0	0	0	1	0
Anolis villai	0	0	0	1	0	0	0	0	0
Anolis vittigerus	0	0	0	1	0	0	0	1	0
Anolis wampuensis	0	0	0	1	0	0	0	0	0
Anolis wattsi	0	0	0	1	0	0	0	0	0
Anolis websteri	0	0	0	1	0	0	0	0	0
Anolis wellbornae	0	0	0	1	0	0	1	0	0
Anolis wermuthi	0	0	0	1	0	0	0	0	0
Anolis whitemani	0	0	0	1	0	0	0	0	0
Anolis williamsii	0	0	0	0	0	0	0	1	0
Anolis williamsmittermeierorum	0	0	0	0	0	0	0	1	0
Anolis woodi	0	0	0	1	0	0	0	0	0
Anolis yoroensis	0	0	0	1	0	0	0	0	0
Anolis zapotecorum	0	0	0	0	0	0	1	0	0
Anolis zeus	0	0	0	1	0	0	0	0	0
Anomalepis aspinosus	0	0	0	0	0	0	0	1	0
Anomalepis colombia	0	0	0	0	0	0	0	1	0
Anomalepis flavapices	0	0	0	0	0	0	0	1	0
Anomalepis mexicanus	0	0	0	1	0	0	0	0	0
Anomalopus brevicollis	0	0	1	0	0	0	0	0	0
Anomalopus gowi	0	0	1	0	0	0	0	0	0
Anomalopus leuckartii	0	0	1	0	0	0	0	0	0
Anomalopus mackayi	0	0	1	0	0	0	0	0	0
Anomalopus pluto	0	0	1	0	0	0	0	0	0
Anomalopus swansoni	0	0	1	0	0	0	0	0	0
Anomalopus verreauxi	0	0	1	0	0	0	0	0	0
Anomochilus leonardi	0	0	0	0	0	0	0	0	1
Anomochilus monticola	0	0	0	0	0	0	0	0	1
Anomochilus weberi	0	0	0	0	0	0	0	0	1
Anoplohydrus aemulans	0	0	0	0	0	0	0	0	1
Anotosaura collaris	0	0	0	0	0	0	0	1	0
Anotosaura vanzolinia	0	0	0	0	0	0	0	1	0
Antaresia childreni	0	0	1	0	0	0	0	0	0
Antaresia maculosa	0	0	1	0	0	0	0	0	0
Antaresia perthensis	0	0	1	0	0	0	0	0	0
Antaresia stimsoni	0	0	1	0	0	0	0	0	0
Aparallactus capensis	1	0	0	0	0	0	0	0	0
Aparallactus guentheri	1	0	0	0	0	0	0	0	0
Aparallactus jacksonii	1	0	0	0	0	0	0	0	0
Aparallactus lineatus	1	0	0	0	0	0	0	0	0
Aparallactus lunulatus	1	1	0	0	0	0	0	0	0
Aparallactus modestus	1	0	0	0	0	0	0	0	0
Aparallactus moeruensis	1	0	0	0	0	0	0	0	0
Aparallactus niger	1	0	0	0	0	0	0	0	0
Aparallactus nigriceps	1	0	0	0	0	0	0	0	0
Aparallactus turneri	1	0	0	0	0	0	0	0	0
Aparallactus werneri	1	0	0	0	0	0	0	0	0
Apathya cappadocica	1	1	0	0	1	0	0	0	0
Apathya yassujica	0	0	0	0	1	0	0	0	0
Aphaniotis acutirostris	0	0	0	0	0	0	0	0	1
Aphaniotis fusca	0	0	0	0	0	0	0	0	1
Aphaniotis ornata	0	0	0	0	0	0	0	0	1
Aplopeltura boa	0	0	0	0	0	0	0	0	1
Apostolepis albicollaris	0	0	0	0	0	0	0	1	0
Apostolepis ambiniger	0	0	0	0	0	0	0	1	0
Apostolepis ammodites	0	0	0	0	0	0	0	1	0
Apostolepis arenaria	0	0	0	0	0	0	0	1	0
Apostolepis assimilis	0	0	0	0	0	0	0	1	0
Apostolepis breviceps	0	0	0	0	0	0	0	1	0
Apostolepis cearensis	0	0	0	0	0	0	0	1	0
Apostolepis cerradoensis	0	0	0	0	0	0	0	1	0
Apostolepis christineae	0	0	0	0	0	0	0	1	0
Apostolepis dimidiata	0	0	0	0	0	0	0	1	0
Apostolepis dorbignyi	0	0	0	0	0	0	0	1	0
Apostolepis flavotorquata	0	0	0	0	0	0	0	1	0
Apostolepis gaboi	0	0	0	0	0	0	0	1	0
Apostolepis goiasensis	0	0	0	0	0	0	0	1	0
Apostolepis intermedia	0	0	0	0	0	0	0	1	0
Apostolepis longicaudata	0	0	0	0	0	0	0	1	0
Apostolepis multicincta	0	0	0	0	0	0	0	1	0
Apostolepis nelsonjorgei	0	0	0	0	0	0	0	1	0
Apostolepis niceforoi	0	0	0	0	0	0	0	1	0
Apostolepis nigrolineata	0	0	0	0	0	0	0	1	0
Apostolepis nigroterminata	0	0	0	0	0	0	0	1	0
Apostolepis parassimilis	0	0	0	0	0	0	0	1	0
Apostolepis phillipsae	0	0	0	0	0	0	0	1	0
Apostolepis polylepis	0	0	0	0	0	0	0	1	0
Apostolepis pymi	0	0	0	0	0	0	0	1	0
Apostolepis quirogai	0	0	0	0	0	0	0	1	0
Apostolepis serrana	0	0	0	0	0	0	0	1	0
Apostolepis striata	0	0	0	0	0	0	0	1	0
Apostolepis tenuis	0	0	0	0	0	0	0	1	0
Apostolepis vittata	0	0	0	0	0	0	0	1	0
Aprasia aurita	0	0	1	0	0	0	0	0	0
Aprasia clairae	0	0	1	0	0	0	0	0	0
Aprasia haroldi	0	0	1	0	0	0	0	0	0
Aprasia inaurita	0	0	1	0	0	0	0	0	0
Aprasia litorea	0	0	1	0	0	0	0	0	0
Aprasia parapulchella	0	0	1	0	0	0	0	0	0
Aprasia picturata	0	0	1	0	0	0	0	0	0
Aprasia pseudopulchella	0	0	1	0	0	0	0	0	0
Aprasia pulchella	0	0	1	0	0	0	0	0	0
Aprasia repens	0	0	1	0	0	0	0	0	1
Aprasia rostrata	0	0	1	0	0	0	0	0	0
Aprasia smithi	0	0	1	0	0	0	0	0	0
Aprasia striolata	0	0	1	0	0	0	0	0	0
Aprosdoketophis andreonei	1	0	0	0	0	0	0	0	0
Archaeolacerta bedriagae	0	0	0	0	1	0	0	0	0
Archaius tigris	1	0	0	0	0	0	0	0	0
Archelaphe bella	0	0	0	0	1	1	0	0	0
Argyrogena fasciolata	0	0	0	0	1	1	0	0	0
Argyrogena vittacaudata	0	0	0	0	1	0	0	0	0
Argyrophis bothriorhynchus	0	0	0	0	0	1	0	0	0
Argyrophis diardii	0	0	0	0	1	1	0	0	1
Argyrophis fuscus	0	0	0	0	0	0	0	0	1
Argyrophis giadinhensis	0	0	0	0	0	0	0	0	1
Argyrophis hypsobothrius	0	0	0	0	0	0	0	0	1
Argyrophis klemmeri	0	0	0	0	0	0	0	0	1
Argyrophis koshunensis	0	0	0	0	1	0	0	0	0
Argyrophis muelleri	0	0	0	0	1	0	0	0	1
Argyrophis oatesii	0	0	0	0	0	0	0	0	1
Argyrophis roxaneae	0	0	0	0	0	0	0	0	1
Argyrophis siamensis	0	0	0	0	0	0	0	0	1
Argyrophis trangensis	0	0	0	0	0	0	0	0	1
Aristelliger barbouri	0	0	0	0	0	0	1	0	0
Aristelliger cochranae	0	0	0	1	0	0	0	0	0
Aristelliger expectatus	0	0	0	1	0	0	0	0	0
Aristelliger georgeensis	0	0	0	1	0	0	1	0	0
Aristelliger hechti	0	0	0	0	0	0	1	0	0
Aristelliger lar	0	0	0	1	0	0	0	0	0
Aristelliger praesignis	0	0	0	1	0	0	1	0	0
Aristelliger reyesi	0	0	0	0	0	0	1	0	0
Arizona elegans	0	0	0	0	0	0	1	0	0
Arrhyton ainictum	0	0	0	0	0	0	1	0	0
Arrhyton dolichura	0	0	0	0	0	0	1	0	0
Arrhyton procerum	0	0	0	0	0	0	1	0	0
Arrhyton redimitum	0	0	0	1	0	0	1	0	0
Arrhyton supernum	0	0	0	0	0	0	1	0	0
Arrhyton taeniatum	0	0	0	1	0	0	1	0	0
Arrhyton tanyplectum	0	0	0	0	0	0	1	0	0
Arrhyton vittatum	0	0	0	0	0	0	1	0	0
Arthrosaura guianensis	0	0	0	0	0	0	0	1	0
Arthrosaura hoogmoedi	0	0	0	0	0	0	0	1	0
Arthrosaura kockii	0	0	0	0	0	0	0	1	0
Arthrosaura montigena	0	0	0	0	0	0	0	1	0
Arthrosaura reticulata	0	0	0	0	0	0	0	1	0
Arthrosaura synaptolepis	0	0	0	0	0	0	0	1	0
Arthrosaura testigensis	0	0	0	0	0	0	0	1	0
Arthrosaura tyleri	0	0	0	0	0	0	0	1	0
Arthrosaura versteegii	0	0	0	0	0	0	0	1	0
Asaccus andersoni	0	0	0	0	1	0	0	0	0
Asaccus barani	0	1	0	0	0	0	0	0	0
Asaccus caudivolvulus	0	1	0	0	0	0	0	0	0
Asaccus elisae	0	1	0	0	1	0	0	0	0
Asaccus gallagheri	0	1	0	0	0	0	0	0	0
Asaccus granularis	0	0	0	0	1	0	0	0	0
Asaccus griseonotus	0	1	0	0	1	0	0	0	0
Asaccus iranicus	0	1	0	0	0	0	0	0	0
Asaccus kermanshahensis	0	0	0	0	1	0	0	0	0
Asaccus kurdistanensis	0	0	0	0	1	0	0	0	0
Asaccus montanus	0	1	0	0	0	0	0	0	0
Asaccus nasrullahi	0	0	0	0	1	0	0	0	0
Asaccus platyrhynchus	0	1	0	0	0	0	0	0	0
Asaccus saffinae	0	0	0	0	1	0	0	0	0
Asaccus tangestanensis	0	1	0	0	1	0	0	0	0
Asaccus zagrosicus	0	0	0	0	1	0	0	0	0
Aspidelaps lubricus	1	0	0	0	0	0	0	0	0
Aspidelaps scutatus	1	0	0	0	0	0	0	0	0
Aspidites melanocephalus	0	0	1	0	0	0	0	0	0
Aspidites ramsayi	0	0	1	0	0	0	0	0	0
Aspidomorphus lineaticollis	0	0	1	0	0	0	0	0	0
Aspidomorphus muelleri	0	0	1	0	0	0	0	0	1
Aspidomorphus schlegelii	0	0	1	0	0	0	0	0	0
Aspidoscelis angusticeps	0	0	0	0	0	0	1	0	0
Aspidoscelis burti	0	0	0	0	0	0	1	0	0
Aspidoscelis calidipes	0	0	0	0	0	0	1	0	0
Aspidoscelis ceralbensis	0	0	0	0	0	0	1	0	0
Aspidoscelis communis	0	0	0	0	0	0	1	0	0
Aspidoscelis costata	0	0	0	0	0	0	1	0	0
Aspidoscelis cozumelae	0	0	0	0	0	0	1	0	0
Aspidoscelis danheimae	0	0	0	0	0	0	1	0	0
Aspidoscelis deppei	0	0	0	1	0	0	1	0	0
Aspidoscelis exsanguis	0	0	0	0	0	0	1	0	0
Aspidoscelis flagellicauda	0	0	0	0	0	0	1	0	0
Aspidoscelis gularis	0	0	0	0	0	0	1	0	0
Aspidoscelis guttata	0	0	0	0	0	0	1	0	0
Aspidoscelis hyperythra	0	0	0	0	0	0	1	0	0
Aspidoscelis inornata	0	0	0	0	0	0	1	0	0
Aspidoscelis labialis	0	0	0	0	0	0	1	0	0
Aspidoscelis laredoensis	0	0	0	0	0	0	1	0	0
Aspidoscelis lineattissima	0	0	0	0	0	0	1	0	0
Aspidoscelis marmorata	0	0	0	0	0	0	1	0	0
Aspidoscelis maslini	0	0	0	0	0	0	1	0	0
Aspidoscelis maxima	0	0	0	0	0	0	1	0	0
Aspidoscelis mexicana	0	0	0	0	0	0	1	0	0
Aspidoscelis motaguae	0	0	0	1	0	0	1	0	0
Aspidoscelis neomexicana	0	0	0	0	0	0	1	0	0
Aspidoscelis neotesselata	0	0	0	0	0	0	1	0	0
Aspidoscelis opatae	0	0	0	0	0	0	1	0	0
Aspidoscelis pai	0	0	0	0	0	0	1	0	0
Aspidoscelis parvisocia	0	0	0	0	0	0	1	0	0
Aspidoscelis picta	0	0	0	0	0	0	1	0	0
Aspidoscelis rodecki	0	0	0	0	0	0	1	0	0
Aspidoscelis sackii	0	0	0	0	0	0	1	0	0
Aspidoscelis scalaris	0	0	0	0	0	0	1	0	0
Aspidoscelis sexlineata	0	0	0	0	0	0	1	0	0
Aspidoscelis sonorae	0	0	0	0	0	0	1	0	0
Aspidoscelis stictogramma	0	0	0	0	0	0	1	0	0
Aspidoscelis tesselata	0	0	0	0	0	0	1	0	0
Aspidoscelis tigris	0	0	0	0	0	0	1	0	0
Aspidoscelis uniparens	0	0	0	0	0	0	1	0	0
Aspidoscelis velox	0	0	0	0	0	0	1	0	0
Aspidoscelis xanthonota	0	0	0	0	0	0	1	0	0
Aspidura brachyorrhos	0	0	0	0	0	1	0	0	0
Aspidura ceylonensis	0	0	0	0	0	1	0	0	0
Aspidura copei	0	0	0	0	0	1	0	0	0
Aspidura deraniyagalae	0	0	0	0	0	1	0	0	0
Aspidura drummondhayi	0	0	0	0	0	1	0	0	0
Aspidura guentheri	0	0	0	0	0	1	0	0	0
Aspidura trachyprocta	0	0	0	0	0	1	0	0	0
Aspronema cochabambae	0	0	0	0	0	0	0	1	0
Aspronema dorsivittatum	0	0	0	0	0	0	0	1	0
Asthenodipsas laevis	0	0	0	0	0	0	0	0	1
Asthenodipsas lasgalenensis	0	0	0	0	0	0	0	0	1
Asthenodipsas malaccanus	0	0	0	0	0	0	0	0	1
Asthenodipsas tropidonotus	0	0	0	0	0	0	0	0	1
Asthenodipsas vertebralis	0	0	0	0	0	0	0	0	1
Asymblepharus alaicus	0	0	0	0	1	0	0	0	0
Asymblepharus eremchenkoi	0	0	0	0	1	0	0	0	0
Asymblepharus himalayanus	0	0	0	0	1	1	0	0	0
Asymblepharus ladacensis	0	0	0	0	1	1	0	0	0
Asymblepharus mahabharatus	0	0	0	0	1	0	0	0	0
Asymblepharus nepalensis	0	0	0	0	1	0	0	0	0
Asymblepharus sikimmensis	0	0	0	0	1	1	0	0	0
Asymblepharus tragbulense	0	0	0	0	1	0	0	0	0
Ateuchosaurus chinensis	0	0	0	0	1	0	0	0	0
Ateuchosaurus pellopleurus	0	0	0	0	1	0	0	0	0
Atheris acuminata	1	0	0	0	0	0	0	0	0
Atheris anisolepis	1	0	0	0	0	0	0	0	0
Atheris barbouri	1	0	0	0	0	0	0	0	0
Atheris broadleyi	1	0	0	0	0	0	0	0	0
Atheris ceratophora	1	0	0	0	0	0	0	0	0
Atheris chlorechis	1	0	0	0	0	0	0	0	0
Atheris desaixi	1	0	0	0	0	0	0	0	0
Atheris hirsuta	1	0	0	0	0	0	0	0	0
Atheris hispida	1	0	0	0	0	0	0	0	0
Atheris katangensis	1	0	0	0	0	0	0	0	0
Atheris mabuensis	1	0	0	0	0	0	0	0	0
Atheris matildae	1	0	0	0	0	0	0	0	0
Atheris nitschei	1	0	0	0	0	0	0	0	0
Atheris rungweensis	1	0	0	0	0	0	0	0	0
Atheris squamigera	1	0	0	0	0	0	0	0	0
Atheris subocularis	1	0	0	0	0	0	0	0	0
Atlantolacerta andreanskyi	1	0	0	0	0	0	0	0	0
Atractaspis andersonii	0	1	0	0	0	0	0	0	0
Atractaspis aterrima	1	0	0	0	0	0	0	0	0
Atractaspis battersbyi	1	0	0	0	0	0	0	0	0
Atractaspis bibronii	1	0	0	0	0	0	0	0	0
Atractaspis boulengeri	1	0	0	0	0	0	0	0	0
Atractaspis congica	1	0	0	0	0	0	0	0	0
Atractaspis corpulenta	1	0	0	0	0	0	0	0	0
Atractaspis dahomeyensis	1	0	0	0	0	0	0	0	0
Atractaspis duerdeni	1	0	0	0	0	0	0	0	0
Atractaspis engaddensis	1	1	0	0	0	0	0	0	0
Atractaspis engdahli	1	0	0	0	0	0	0	0	0
Atractaspis fallax	1	1	0	0	0	0	0	0	0
Atractaspis irregularis	1	0	0	0	0	0	0	0	0
Atractaspis leucomelas	1	0	0	0	0	0	0	0	0
Atractaspis magrettii	1	0	0	0	0	0	0	0	0
Atractaspis microlepidota	1	1	0	0	0	0	0	0	0
Atractaspis micropholis	1	0	0	0	0	0	0	0	0
Atractaspis phillipsi	1	0	0	0	0	0	0	0	0
Atractaspis reticulata	1	0	0	0	0	0	0	0	0
Atractaspis scorteccii	1	0	0	0	0	0	0	0	0
Atractaspis watsoni	1	0	0	0	0	0	0	0	0
Atractus acheronius	0	0	0	0	0	0	0	1	0
Atractus albuquerquei	0	0	0	0	0	0	0	1	0
Atractus alphonsehogei	0	0	0	0	0	0	0	1	0
Atractus altagratiae	0	0	0	0	0	0	0	1	0
Atractus alytogrammus	0	0	0	0	0	0	0	1	0
Atractus andinus	0	0	0	0	0	0	0	1	0
Atractus apophis	0	0	0	0	0	0	0	1	0
Atractus arangoi	0	0	0	0	0	0	0	1	0
Atractus atratus	0	0	0	0	0	0	0	1	0
Atractus attenuates	0	0	0	0	0	0	0	1	0
Atractus avernus	0	0	0	0	0	0	0	1	0
Atractus ayeush	0	0	0	0	0	0	0	1	0
Atractus badius	0	0	0	0	0	0	0	1	0
Atractus balzani	0	0	0	0	0	0	0	1	0
Atractus biseriatus	0	0	0	0	0	0	0	1	0
Atractus bocki	0	0	0	0	0	0	0	1	0
Atractus bocourti	0	0	0	0	0	0	0	1	0
Atractus boettgeri	0	0	0	0	0	0	0	1	0
Atractus boulengerii	0	0	0	0	0	0	0	1	0
Atractus caete	0	0	0	0	0	0	0	1	0
Atractus careolepis	0	0	0	0	0	0	0	1	0
Atractus carrioni	0	0	0	0	0	0	0	1	0
Atractus caxiuana	0	0	0	0	0	0	0	1	0
Atractus charitoae	0	0	0	0	0	0	0	1	0
Atractus chthonius	0	0	0	0	0	0	0	1	0
Atractus clarki	0	0	0	0	0	0	0	1	0
Atractus collaris	0	0	0	0	0	0	0	1	0
Atractus crassicaudatus	0	0	0	0	0	0	0	1	0
Atractus darienensis	0	0	0	1	0	0	0	0	0
Atractus depressiocellus	0	0	0	1	0	0	0	0	0
Atractus duboisi	0	0	0	0	0	0	0	1	0
Atractus duidensis	0	0	0	0	0	0	0	1	0
Atractus dunni	0	0	0	0	0	0	0	1	0
Atractus echidna	0	0	0	0	0	0	0	1	0
Atractus ecuadorensis	0	0	0	0	0	0	0	1	0
Atractus edioi	0	0	0	0	0	0	0	1	0
Atractus elaps	0	0	0	0	0	0	0	1	0
Atractus emigdioi	0	0	0	0	0	0	0	1	0
Atractus emmeli	0	0	0	0	0	0	0	1	0
Atractus eriki	0	0	0	0	0	0	0	1	0
Atractus erythromelas	0	0	0	0	0	0	0	1	0
Atractus favae	0	0	0	0	0	0	0	1	0
Atractus flammigerus	0	0	0	0	0	0	0	1	0
Atractus franciscopaivai	0	0	0	0	0	0	0	1	0
Atractus francoi	0	0	0	0	0	0	0	1	0
Atractus fuliginosus	0	0	0	0	0	0	0	1	0
Atractus gaigeae	0	0	0	0	0	0	0	1	0
Atractus gigas	0	0	0	0	0	0	0	1	0
Atractus guentheri	0	0	0	0	0	0	0	1	0
Atractus heliobelluomini	0	0	0	0	0	0	0	1	0
Atractus hoogmoedi	0	0	0	0	0	0	0	1	0
Atractus hostilitractus	0	0	0	1	0	0	0	0	0
Atractus imperfectus	0	0	0	1	0	0	0	0	0
Atractus indistinctus	0	0	0	0	0	0	0	1	0
Atractus insipidus	0	0	0	0	0	0	0	1	0
Atractus iridescens	0	0	0	0	0	0	0	1	0
Atractus lancinii	0	0	0	0	0	0	0	1	0
Atractus lasallei	0	0	0	0	0	0	0	1	0
Atractus latifrons	0	0	0	0	0	0	0	1	0
Atractus lehmanni	0	0	0	0	0	0	0	1	0
Atractus limitaneus	0	0	0	0	0	0	0	1	0
Atractus loveridgei	0	0	0	0	0	0	0	1	0
Atractus macondo	0	0	0	0	0	0	0	1	0
Atractus maculatus	0	0	0	0	0	0	0	1	0
Atractus major	0	0	0	0	0	0	0	1	0
Atractus manizalesensis	0	0	0	0	0	0	0	1	0
Atractus mariselae	0	0	0	0	0	0	0	1	0
Atractus matthewi	0	0	0	0	0	0	0	1	0
Atractus medusa	0	0	0	0	0	0	0	1	0
Atractus melanogaster	0	0	0	0	0	0	0	1	0
Atractus melas	0	0	0	0	0	0	0	1	0
Atractus meridensis	0	0	0	0	0	0	0	1	0
Atractus micheleae	0	0	0	0	0	0	0	1	0
Atractus microrhynchus	0	0	0	0	0	0	0	1	0
Atractus mijaresi	0	0	0	0	0	0	0	1	0
Atractus modestus	0	0	0	0	0	0	0	1	0
Atractus multicinctus	0	0	0	0	0	0	0	1	0
Atractus multidentatus	0	0	0	0	0	0	0	1	0
Atractus nasutus	0	0	0	0	0	0	0	1	0
Atractus natans	0	0	0	0	0	0	0	1	0
Atractus nicefori	0	0	0	0	0	0	0	1	0
Atractus nigricaudus	0	0	0	0	0	0	0	1	0
Atractus nigriventris	0	0	0	0	0	0	0	1	0
Atractus obesus	0	0	0	0	0	0	0	1	0
Atractus obtusirostris	0	0	0	0	0	0	0	1	0
Atractus occidentalis	0	0	0	0	0	0	0	1	0
Atractus occipitoalbus	0	0	0	0	0	0	0	1	0
Atractus ochrosetrus	0	0	0	0	0	0	0	1	0
Atractus oculotemporalis	0	0	0	0	0	0	0	1	0
Atractus orcesi	0	0	0	0	0	0	0	1	0
Atractus paisa	0	0	0	0	0	0	0	1	0
Atractus pamplonensis	0	0	0	0	0	0	0	1	0
Atractus pantostictus	0	0	0	0	0	0	0	1	0
Atractus paraguayensis	0	0	0	0	0	0	0	1	0
Atractus paravertebralis	0	0	0	0	0	0	0	1	0
Atractus paucidens	0	0	0	0	0	0	0	1	0
Atractus pauciscutatus	0	0	0	0	0	0	0	1	0
Atractus peruvianus	0	0	0	0	0	0	0	1	0
Atractus poeppigi	0	0	0	0	0	0	0	1	0
Atractus potschi	0	0	0	0	0	0	0	1	0
Atractus punctiventris	0	0	0	0	0	0	0	1	0
Atractus resplendens	0	0	0	0	0	0	0	1	0
Atractus reticulatus	0	0	0	0	0	0	0	1	0
Atractus riveroi	0	0	0	0	0	0	0	1	0
Atractus ronnie	0	0	0	0	0	0	0	1	0
Atractus roulei	0	0	0	0	0	0	0	1	0
Atractus sanctaemartae	0	0	0	0	0	0	0	1	0
Atractus sanguineus	0	0	0	0	0	0	0	1	0
Atractus savagei	0	0	0	0	0	0	0	1	0
Atractus schach	0	0	0	0	0	0	0	1	0
Atractus serranus	0	0	0	0	0	0	0	1	0
Atractus snethlageae	0	0	0	0	0	0	0	1	0
Atractus spinalis	0	0	0	0	0	0	0	1	0
Atractus steyermarki	0	0	0	0	0	0	0	1	0
Atractus surucucu	0	0	0	0	0	0	0	1	0
Atractus taeniatus	0	0	0	0	0	0	0	1	0
Atractus tamaensis	0	0	0	0	0	0	0	1	0
Atractus tamessari	0	0	0	0	0	0	0	1	0
Atractus taphorni	0	0	0	0	0	0	0	1	0
Atractus thalesdelemai	0	0	0	0	0	0	0	1	0
Atractus titanicus	0	0	0	0	0	0	0	1	0
Atractus torquatus	0	0	0	0	0	0	0	1	0
Atractus touzeti	0	0	0	0	0	0	0	1	0
Atractus trihedrurus	0	0	0	0	0	0	0	1	0
Atractus trilineatus	0	0	0	1	0	0	0	1	0
Atractus trivittatus	0	0	0	0	0	0	0	1	0
Atractus turikensis	0	0	0	0	0	0	0	1	0
Atractus typhon	0	0	0	0	0	0	0	1	0
Atractus univittatus	0	0	0	1	0	0	0	0	0
Atractus variegatus	0	0	0	0	0	0	0	1	0
Atractus ventrimaculatus	0	0	0	0	0	0	0	1	0
Atractus vertebralis	0	0	0	0	0	0	0	1	0
Atractus vertebrolineatus	0	0	0	0	0	0	0	1	0
Atractus vittatus	0	0	0	0	0	0	0	1	0
Atractus wagleri	0	0	0	0	0	0	0	1	0
Atractus werneri	0	0	0	0	0	0	0	1	0
Atractus zebrinus	0	0	0	0	0	0	0	1	0
Atractus zidoki	0	0	0	0	0	0	0	1	0
Atretium schistosum	0	0	0	0	1	1	0	0	0
Atretium yunnanensis	0	0	0	0	1	0	0	0	0
Atropoides indomitus	0	0	0	1	0	0	0	0	0
Atropoides mexicanus	0	0	0	1	0	0	1	0	0
Atropoides nummifer	0	0	0	0	0	0	1	0	0
Atropoides occiduus	0	0	0	1	0	0	1	0	0
Atropoides olmec	0	0	0	0	0	0	1	0	0
Atropoides picadoi	0	0	0	1	0	0	0	0	0
Aurivela longicauda	0	0	0	0	0	0	0	1	0
Aurivela tergolaevigata	0	0	0	0	0	0	0	1	0
Australolacerta australis	1	0	0	0	0	0	0	0	0
Austrelaps labialis	0	0	1	0	0	0	0	0	0
Austrelaps ramsayi	0	0	1	0	0	0	0	0	0
Austrelaps superbus	0	0	1	0	0	0	0	0	0
Azemiops feae	0	0	0	0	1	1	0	0	0
Azemiops kharini	0	0	0	0	1	0	0	0	0
Bachia barbouri	0	0	0	0	0	0	0	1	0
Bachia bicolor	0	0	0	0	0	0	0	1	0
Bachia bresslaui	0	0	0	0	0	0	0	1	0
Bachia cacerensis	0	0	0	0	0	0	0	1	0
Bachia didactyla	0	0	0	0	0	0	0	1	0
Bachia dorbignyi	0	0	0	0	0	0	0	1	0
Bachia flavescens	0	0	0	1	0	0	0	1	0
Bachia geralista	0	0	0	0	0	0	0	1	0
Bachia guianensis	0	0	0	0	0	0	0	1	0
Bachia heteropa	0	0	0	1	0	0	0	1	0
Bachia huallagana	0	0	0	0	0	0	0	1	0
Bachia intermedia	0	0	0	0	0	0	0	1	0
Bachia micromela	0	0	0	0	0	0	0	1	0
Bachia oxyrhina	0	0	0	0	0	0	0	1	0
Bachia pallidiceps	0	0	0	1	0	0	0	1	0
Bachia panoplia	0	0	0	0	0	0	0	1	0
Bachia peruana	0	0	0	0	0	0	0	1	0
Bachia psamophila	0	0	0	0	0	0	0	1	0
Bachia pyburni	0	0	0	0	0	0	0	1	0
Bachia scaea	0	0	0	0	0	0	0	1	0
Bachia scolecoides	0	0	0	0	0	0	0	1	0
Bachia talpa	0	0	0	0	0	0	0	1	0
Bachia trisanale	0	0	0	0	0	0	0	1	0
Baikia africana	1	0	0	0	0	0	0	0	0
Balanophis ceylonensis	0	0	0	0	0	1	0	0	0
Bamanophis dorri	1	0	0	0	0	0	0	0	0
Barisia ciliaris	0	0	0	0	0	0	1	0	0
Barisia herrerae	0	0	0	0	0	0	1	0	0
Barisia imbricata	0	0	0	0	0	0	1	0	0
Barisia levicollis	0	0	0	0	0	0	1	0	0
Barisia rudicollis	0	0	0	0	0	0	1	0	0
Barkudia insularis	0	0	0	0	0	1	0	0	0
Barkudia melanosticta	0	0	0	0	0	1	0	0	0
Basiliscus basiliscus	0	0	0	1	0	0	0	1	0
Basiliscus galeritus	0	0	0	1	0	0	0	1	0
Basiliscus plumifrons	0	0	0	1	0	0	0	0	0
Basiliscus vittatus	0	0	0	1	0	0	1	0	0
Bassiana duperreyi	0	0	1	0	0	0	0	0	0
Bassiana platynota	0	0	1	0	0	0	0	0	0
Bassiana trilineata	0	0	1	0	0	0	0	0	0
Bavayia crassicollis	0	0	1	0	0	0	0	0	0
Bavayia cyclura	0	0	1	0	0	0	0	0	0
Bavayia exsuccida	0	0	1	0	0	0	0	0	0
Bavayia geitaina	0	0	1	0	0	0	0	0	0
Bavayia goroensis	0	0	1	0	0	0	0	0	0
Bavayia montana	0	0	1	0	0	0	0	0	0
Bavayia nubila	0	0	1	0	0	0	0	0	0
Bavayia ornata	0	0	1	0	0	0	0	0	0
Bavayia pulchella	0	0	1	0	0	0	0	0	0
Bavayia robusta	0	0	1	0	0	0	0	0	0
Bavayia sauvagii	0	0	1	0	0	0	0	0	0
Bavayia septuiclavis	0	0	1	0	0	0	0	0	0
Bellatorias frerei	0	0	1	0	0	0	0	0	0
Bellatorias major	0	0	1	0	0	0	0	0	0
Bellatorias obiri	0	0	1	0	0	0	0	0	0
Bipes biporus	0	0	0	0	0	0	1	0	0
Bipes canaliculatus	0	0	0	0	0	0	1	0	0
Bipes tridactylus	0	0	0	0	0	0	1	0	0
Bitia hydroides	0	0	0	0	1	1	0	0	1
Bitis albanica	1	0	0	0	0	0	0	0	0
Bitis arietans	1	1	0	0	0	0	0	0	0
Bitis armata	1	0	0	0	0	0	0	0	0
Bitis atropos	1	0	0	0	0	0	0	0	0
Bitis caudalis	1	0	0	0	0	0	0	0	0
Bitis cornuta	1	0	0	0	0	0	0	0	0
Bitis gabonica	1	0	0	0	0	0	0	0	0
Bitis heraldica	1	0	0	0	0	0	0	0	0
Bitis inornata	1	0	0	0	0	0	0	0	0
Bitis nasicornis	1	0	0	0	0	0	0	0	0
Bitis parviocula	1	0	0	0	0	0	0	0	0
Bitis peringueyi	1	0	0	0	0	0	0	0	0
Bitis rhinoceros	1	0	0	0	0	0	0	0	0
Bitis rubida	1	0	0	0	0	0	0	0	0
Bitis schneideri	1	0	0	0	0	0	0	0	0
Bitis worthingtoni	1	0	0	0	0	0	0	0	0
Bitis xeropaga	1	0	0	0	0	0	0	0	0
Blaesodactylus ambonihazo	1	0	0	0	0	0	0	0	0
Blaesodactylus antongilensis	1	0	0	0	0	0	0	0	0
Blaesodactylus boivini	1	0	0	0	0	0	0	0	0
Blaesodactylus sakalava	1	0	0	0	0	0	0	0	0
Blanus alexandri	0	1	0	0	1	0	0	0	0
Blanus aporus	1	1	0	0	1	0	0	0	0
Blanus cinereus	0	0	0	0	1	0	0	0	0
Blanus mariae	0	0	0	0	1	0	0	0	0
Blanus mettetali	1	0	0	0	1	0	0	0	0
Blanus strauchi	1	1	0	0	1	0	0	0	0
Blanus tingitanus	1	0	0	0	1	0	0	0	0
Blythia reticulata	0	0	0	0	1	1	0	0	0
Boa constrictor	0	0	0	1	0	0	1	1	0
Boaedon capensis	1	0	0	0	0	0	0	0	0
Boaedon fuliginosus	1	1	0	0	0	0	0	0	0
Boaedon lineatus	1	0	0	0	0	0	0	0	0
Boaedon maculatus	1	1	0	0	0	0	0	0	0
Boaedon olivaceus	1	0	0	0	0	0	0	0	0
Boaedon virgatus	1	0	0	0	0	0	0	0	0
Bogertophis rosaliae	0	0	0	0	0	0	1	0	0
Bogertophis subocularis	0	0	0	0	0	0	1	0	0
Boiga andamanensis	0	0	0	0	0	0	0	0	1
Boiga angulata	0	0	0	0	0	0	0	0	1
Boiga barnesii	0	0	0	0	0	1	0	0	0
Boiga beddomei	0	0	0	0	0	1	0	0	0
Boiga bengkuluensis	0	0	0	0	0	0	0	0	1
Boiga bourreti	0	0	0	0	1	0	0	0	1
Boiga ceylonensis	0	0	0	0	0	1	0	0	0
Boiga cyanea	0	0	0	0	1	1	0	0	1
Boiga cynodon	0	0	0	0	0	0	0	0	1
Boiga dendrophila	0	0	0	0	1	0	0	0	1
Boiga dightoni	0	0	0	0	0	1	0	0	0
Boiga drapiezii	0	0	0	0	0	0	0	0	1
Boiga flaviviridis	0	0	0	0	0	1	0	0	0
Boiga forsteni	0	0	0	0	1	1	0	0	0
Boiga gokool	0	0	0	0	1	1	0	0	0
Boiga guangxiensis	0	0	0	0	1	0	0	0	1
Boiga hoeseli	0	0	0	0	0	0	0	0	1
Boiga irregularis	0	0	1	0	0	0	0	0	1
Boiga jaspidea	0	0	0	0	0	0	0	0	1
Boiga kraepelini	0	0	0	0	1	0	0	0	1
Boiga multifasciata	0	0	0	0	1	1	0	0	0
Boiga multomaculata	0	0	0	0	1	0	0	0	0
Boiga nigriceps	0	0	0	0	0	0	0	0	1
Boiga nuchalis	0	0	0	0	1	1	0	0	0
Boiga ochracea	0	0	0	0	1	1	0	0	1
Boiga philippina	0	0	0	0	0	0	0	0	1
Boiga quincunciata	0	0	0	0	0	1	0	0	0
Boiga saengsomi	0	0	0	0	0	0	0	0	1
Boiga schultzei	0	0	0	0	0	0	0	0	1
Boiga siamensis	0	0	0	0	1	1	0	0	1
Boiga tanahjampeana	0	0	0	0	0	0	0	0	1
Boiga trigonata	0	1	0	0	1	1	0	0	0
Boiga wallachi	0	0	0	0	0	0	0	0	1
Boiruna maculata	0	0	0	0	0	0	0	1	0
Boiruna sertaneja	0	0	0	0	0	0	0	1	0
Bolyeria multocarinata	1	0	0	0	0	0	0	0	0
Borikenophis portoricensis	0	0	0	1	0	0	0	0	0
Borikenophis sanctaecrucis	0	0	0	1	0	0	0	0	0
Borikenophis variegatus	0	0	0	1	0	0	0	0	0
Bothriechis aurifer	0	0	0	0	0	0	1	0	0
Bothriechis bicolor	0	0	0	0	0	0	1	0	0
Bothriechis guifarroi	0	0	0	1	0	0	0	0	0
Bothriechis lateralis	0	0	0	1	0	0	0	0	0
Bothriechis marchi	0	0	0	1	0	0	0	0	0
Bothriechis nigroviridis	0	0	0	1	0	0	0	0	0
Bothriechis rowleyi	0	0	0	0	0	0	1	0	0
Bothriechis schlegelii	0	0	0	1	0	0	1	1	0
Bothriechis supraciliaris	0	0	0	1	0	0	0	0	0
Bothriechis thalassinus	0	0	0	1	0	0	0	0	0
Bothrochilus albertisii	0	0	1	0	0	0	0	0	0
Bothrochilus biakensis	0	0	1	0	0	0	0	0	0
Bothrochilus boa	0	0	1	0	0	0	0	0	0
Bothrochilus fredparkeri	0	0	1	0	0	0	0	0	0
Bothrochilus huonensis	0	0	1	0	0	0	0	0	0
Bothrocophias andianus	0	0	0	0	0	0	0	1	0
Bothrocophias campbelli	0	0	0	0	0	0	0	1	0
Bothrocophias colombianus	0	0	0	0	0	0	0	1	0
Bothrocophias hyoprora	0	0	0	0	0	0	0	1	0
Bothrocophias microphthalmus	0	0	0	0	0	0	0	1	0
Bothrocophias myersi	0	0	0	0	0	0	0	1	0
Bothrolycus ater	1	0	0	0	0	0	0	0	0
Bothrophthalmus brunneus	1	0	0	0	0	0	0	0	0
Bothrophthalmus lineatus	1	0	0	0	0	0	0	0	0
Bothrops alcatraz	0	0	0	0	0	0	0	1	0
Bothrops alternatus	0	0	0	0	0	0	0	1	0
Bothrops ammodytoides	0	0	0	0	0	0	0	1	0
Bothrops asper	0	0	0	1	0	0	1	1	0
Bothrops atrox	0	0	0	0	0	0	0	1	0
Bothrops ayerbei	0	0	0	0	0	0	0	1	0
Bothrops barnetti	0	0	0	0	0	0	0	1	0
Bothrops bilineata	0	0	0	0	0	0	0	1	0
Bothrops brazili	0	0	0	0	0	0	0	1	0
Bothrops caribbaeus	0	0	0	1	0	0	0	0	0
Bothrops chloromelas	0	0	0	0	0	0	0	1	0
Bothrops cotiara	0	0	0	0	0	0	0	1	0
Bothrops diporus	0	0	0	0	0	0	0	1	0
Bothrops erythromelas	0	0	0	0	0	0	0	1	0
Bothrops fonsecai	0	0	0	0	0	0	0	1	0
Bothrops insularis	0	0	0	0	0	0	0	1	0
Bothrops itapetiningae	0	0	0	0	0	0	0	1	0
Bothrops jararaca	0	0	0	0	0	0	0	1	0
Bothrops jararacussu	0	0	0	0	0	0	0	1	0
Bothrops jonathani	0	0	0	0	0	0	0	1	0
Bothrops lanceolatus	0	0	0	1	0	0	0	0	0
Bothrops leucurus	0	0	0	0	0	0	0	1	0
Bothrops lojanus	0	0	0	0	0	0	0	1	0
Bothrops lutzi	0	0	0	0	0	0	0	1	0
Bothrops marajoensis	0	0	0	0	0	0	0	1	0
Bothrops marmoratus	0	0	0	0	0	0	0	1	0
Bothrops matogrossensis	0	0	0	0	0	0	0	1	0
Bothrops medusa	0	0	0	0	0	0	0	1	0
Bothrops moojeni	0	0	0	0	0	0	0	1	0
Bothrops muriciensis	0	0	0	0	0	0	0	1	0
Bothrops neuwiedi	0	0	0	0	0	0	0	1	0
Bothrops oligolepis	0	0	0	0	0	0	0	1	0
Bothrops osbornei	0	0	0	0	0	0	0	1	0
Bothrops otavioi	0	0	0	0	0	0	0	1	0
Bothrops pauloensis	0	0	0	0	0	0	0	1	0
Bothrops pictus	0	0	0	0	0	0	0	1	0
Bothrops pirajai	0	0	0	0	0	0	0	1	0
Bothrops pubescens	0	0	0	0	0	0	0	1	0
Bothrops pulchra	0	0	0	0	0	0	0	1	0
Bothrops punctatus	0	0	0	1	0	0	0	1	0
Bothrops rhombeatus	0	0	0	0	0	0	0	1	0
Bothrops sanctaecrucis	0	0	0	0	0	0	0	1	0
Bothrops taeniata	0	0	0	0	0	0	0	1	0
Bothrops venezuelensis	0	0	0	1	0	0	0	1	0
Brachylophus bulabula	0	0	1	0	0	0	0	0	0
Brachylophus fasciatus	0	0	1	0	0	0	0	0	0
Brachylophus vitiensis	0	0	1	0	0	0	0	0	0
Brachymeles apus	0	0	0	0	0	0	0	0	1
Brachymeles bicolandia	0	0	0	0	0	0	0	0	1
Brachymeles bicolor	0	0	0	0	0	0	0	0	1
Brachymeles boholensis	0	0	0	0	0	0	0	0	1
Brachymeles bonitae	0	0	0	0	0	0	0	0	1
Brachymeles boulengeri	0	0	0	0	0	0	0	0	1
Brachymeles brevidactylus	0	0	0	0	0	0	0	0	1
Brachymeles cebuensis	0	0	0	0	0	0	0	0	1
Brachymeles cobos	0	0	0	0	0	0	0	0	1
Brachymeles elerae	0	0	0	0	0	0	0	0	1
Brachymeles gracilis	0	0	0	0	0	0	0	0	1
Brachymeles hilong	0	0	0	0	0	0	0	0	1
Brachymeles kadwa	0	0	0	0	0	0	0	0	1
Brachymeles libayani	0	0	0	0	0	0	0	0	1
Brachymeles lukbani	0	0	0	0	0	0	0	0	1
Brachymeles makusog	0	0	0	0	0	0	0	0	1
Brachymeles mindorensis	0	0	0	0	0	0	0	0	1
Brachymeles minimus	0	0	0	0	0	0	0	0	1
Brachymeles miriamae	0	0	0	0	0	0	0	0	1
Brachymeles muntingkamay	0	0	0	0	0	0	0	0	1
Brachymeles orientalis	0	0	0	0	0	0	0	0	1
Brachymeles paeforum	0	0	0	0	0	0	0	0	1
Brachymeles pathfinderi	0	0	0	0	0	0	0	0	1
Brachymeles samad	0	0	0	0	0	0	0	0	1
Brachymeles samarensis	0	0	0	0	0	0	0	0	1
Brachymeles schadenbergi	0	0	0	0	0	0	0	0	1
Brachymeles suluensis	0	0	0	0	0	0	0	0	1
Brachymeles talinis	0	0	0	0	0	0	0	0	1
Brachymeles taylori	0	0	0	0	0	0	0	0	1
Brachymeles tiboliorum	0	0	0	0	0	0	0	0	1
Brachymeles tridactylus	0	0	0	0	0	0	0	0	1
Brachymeles tungaoi	0	0	0	0	0	0	0	0	1
Brachymeles vermis	0	0	0	0	0	0	0	0	1
Brachymeles vindumi	0	0	0	0	0	0	0	0	1
Brachymeles vulcani	0	0	0	0	0	0	0	0	1
Brachymeles wrighti	0	0	0	0	0	0	0	0	1
Brachyophidium rhodogaster	0	0	0	0	0	1	0	0	0
Brachyophis revoili	1	0	0	0	0	0	0	0	0
Brachyorrhos albus	0	0	1	0	0	0	0	0	1
Brachyorrhos gastrotaenius	0	0	0	0	0	0	0	0	1
Brachyorrhos raffrayi	0	0	1	0	0	0	0	0	0
Brachyorrhos wallacei	0	0	1	0	0	0	0	0	0
Brachysaura minor	0	0	0	0	1	1	0	0	0
Brachyurophis approximans	0	0	1	0	0	0	0	0	0
Brachyurophis australis	0	0	1	0	0	0	0	0	0
Brachyurophis fasciolatus	0	0	1	0	0	0	0	0	0
Brachyurophis incinctus	0	0	1	0	0	0	0	0	0
Brachyurophis morrisi	0	0	1	0	0	0	0	0	0
Brachyurophis roperi	0	0	1	0	0	0	0	0	0
Brachyurophis semifasciatus	0	0	1	0	0	0	0	0	0
Bradypodion atromontanum	1	0	0	0	0	0	0	0	0
Bradypodion caeruleogula	1	0	0	0	0	0	0	0	0
Bradypodion caffer	1	0	0	0	0	0	0	0	0
Bradypodion damaranum	1	0	0	0	0	0	0	0	0
Bradypodion dracomontanum	1	0	0	0	0	0	0	0	0
Bradypodion gutturale	1	0	0	0	0	0	0	0	0
Bradypodion kentanicum	1	0	0	0	0	0	0	0	0
Bradypodion melanocephalum	1	0	0	0	0	0	0	0	0
Bradypodion nemorale	1	0	0	0	0	0	0	0	0
Bradypodion ngomeense	1	0	0	0	0	0	0	0	0
Bradypodion occidentale	1	0	0	0	0	0	0	0	0
Bradypodion pumilum	1	0	0	0	0	0	0	0	0
Bradypodion setaroi	1	0	0	0	0	0	0	0	0
Bradypodion taeniabronchum	1	0	0	0	0	0	0	0	0
Bradypodion thamnobates	1	0	0	0	0	0	0	0	0
Bradypodion transvaalense	1	0	0	0	0	0	0	0	0
Bradypodion ventrale	1	0	0	0	0	0	0	0	0
Brasiliscincus agilis	0	0	0	0	0	0	0	1	0
Brasiliscincus caissara	0	0	0	0	0	0	0	1	0
Brasiliscincus heathi	0	0	0	0	0	0	0	1	0
Broadleysaurus major	1	1	0	0	0	0	0	0	0
Bronchocela celebensis	0	0	0	0	0	0	0	0	1
Bronchocela cristatella	0	0	1	0	1	0	0	0	1
Bronchocela danieli	0	0	0	0	0	0	0	0	1
Bronchocela hayeki	0	0	0	0	0	0	0	0	1
Bronchocela jubata	0	0	0	0	0	0	0	0	1
Bronchocela marmorata	0	0	0	0	0	0	0	0	1
Bronchocela orlovi	0	0	0	0	0	0	0	0	1
Bronchocela rubrigularis	0	0	0	0	0	0	0	0	1
Bronchocela smaragdina	0	0	0	0	0	0	0	0	1
Bronchocela vietnamensis	0	0	0	0	0	0	0	0	1
Brookesia ambreensis	1	0	0	0	0	0	0	0	0
Brookesia antakarana	1	0	0	0	0	0	0	0	0
Brookesia bekolosy	1	0	0	0	0	0	0	0	0
Brookesia betschi	1	0	0	0	0	0	0	0	0
Brookesia bonsi	1	0	0	0	0	0	0	0	0
Brookesia brunoi	1	0	0	0	0	0	0	0	0
Brookesia brygooi	1	0	0	0	0	0	0	0	0
Brookesia confidens	1	0	0	0	0	0	0	0	0
Brookesia decaryi	1	0	0	0	0	0	0	0	0
Brookesia dentata	1	0	0	0	0	0	0	0	0
Brookesia desperata	1	0	0	0	0	0	0	0	0
Brookesia ebenaui	1	0	0	0	0	0	0	0	0
Brookesia exarmata	1	0	0	0	0	0	0	0	0
Brookesia griveaudi	1	0	0	0	0	0	0	0	0
Brookesia karchei	1	0	0	0	0	0	0	0	0
Brookesia lambertoni	1	0	0	0	0	0	0	0	0
Brookesia lineata	1	0	0	0	0	0	0	0	0
Brookesia micra	1	0	0	0	0	0	0	0	0
Brookesia minima	1	0	0	0	0	0	0	0	0
Brookesia perarmata	1	0	0	0	0	0	0	0	0
Brookesia peyrierasi	1	0	0	0	0	0	0	0	0
Brookesia ramanantsoai	1	0	0	0	0	0	0	0	0
Brookesia stumpffi	1	0	0	0	0	0	0	0	0
Brookesia superciliaris	1	0	0	0	0	0	0	0	0
Brookesia therezieni	1	0	0	0	0	0	0	0	0
Brookesia thieli	1	0	0	0	0	0	0	0	0
Brookesia tristis	1	0	0	0	0	0	0	0	0
Brookesia tuberculata	1	0	0	0	0	0	0	0	0
Brookesia vadoni	1	0	0	0	0	0	0	0	0
Brookesia valerieae	1	0	0	0	0	0	0	0	0
Brygophis coulangesi	1	0	0	0	0	0	0	0	0
Bufoniceps laungwalaensis	0	0	0	0	0	1	0	0	0
Buhoma depressiceps	1	0	0	0	0	0	0	0	0
Buhoma procterae	1	0	0	0	0	0	0	0	0
Buhoma vauerocegae	1	0	0	0	0	0	0	0	0
Bungarus andamanensis	0	0	0	0	0	0	0	0	1
Bungarus bungaroides	0	0	0	0	1	1	0	0	0
Bungarus caeruleus	0	0	0	0	1	1	0	0	0
Bungarus candidus	0	0	0	0	1	0	0	0	1
Bungarus ceylonicus	0	0	0	0	0	1	0	0	0
Bungarus fasciatus	0	0	0	0	1	1	0	0	1
Bungarus flaviceps	0	0	0	0	0	0	0	0	1
Bungarus lividus	0	0	0	0	1	1	0	0	0
Bungarus magnimaculatus	0	0	0	0	1	1	0	0	0
Bungarus multicinctus	0	0	0	0	1	1	0	0	1
Bungarus niger	0	0	0	0	1	1	0	0	0
Bungarus sindanus	0	0	0	0	1	1	0	0	0
Bungarus slowinskii	0	0	0	0	1	0	0	0	1
Bunopus blanfordii	1	1	0	0	0	0	0	0	0
Bunopus crassicauda	0	0	0	0	1	0	0	0	0
Bunopus spatalurus	0	1	0	0	0	0	0	0	0
Bunopus tuberculatus	1	1	0	0	1	1	0	0	0
Caaeteboia amarali	0	0	0	0	0	0	0	1	0
Cacophis churchilli	0	0	1	0	0	0	0	0	0
Cacophis harriettae	0	0	1	0	0	0	0	0	0
Cacophis krefftii	0	0	1	0	0	0	0	0	0
Cacophis squamulosus	0	0	1	0	0	0	0	0	0
Cadea blanoides	0	0	0	0	0	0	1	0	0
Cadea palirostrata	0	0	0	0	0	0	1	0	0
Calabaria reinhardtii	1	0	0	0	0	0	0	0	0
Calamaria abramovi	0	0	0	0	0	0	0	0	1
Calamaria abstrusa	0	0	0	0	0	0	0	0	1
Calamaria acutirostris	0	0	0	0	0	0	0	0	1
Calamaria albiventer	0	0	0	0	0	0	0	0	1
Calamaria alidae	0	0	0	0	0	0	0	0	1
Calamaria apraeocularis	0	0	0	0	0	0	0	0	1
Calamaria banggaiensis	0	0	0	0	0	0	0	0	1
Calamaria battersbyi	0	0	0	0	0	0	0	0	1
Calamaria bicolor	0	0	0	0	0	0	0	0	1
Calamaria bitorques	0	0	0	0	0	0	0	0	1
Calamaria boesemani	0	0	0	0	0	0	0	0	1
Calamaria borneensis	0	0	0	0	0	0	0	0	1
Calamaria brongersmai	0	0	0	0	0	0	0	0	1
Calamaria buchi	0	0	0	0	1	0	0	0	1
Calamaria butonensis	0	0	0	0	0	0	0	0	1
Calamaria ceramensis	0	0	0	0	0	0	0	0	1
Calamaria concolor	0	0	0	0	0	0	0	0	1
Calamaria crassa	0	0	0	0	0	0	0	0	1
Calamaria curta	0	0	0	0	0	0	0	0	1
Calamaria doederleini	0	0	0	0	0	0	0	0	1
Calamaria eiselti	0	0	0	0	0	0	0	0	1
Calamaria everetti	0	0	0	0	0	0	0	0	1
Calamaria forcarti	0	0	0	0	0	0	0	0	1
Calamaria gervaisii	0	0	0	0	0	0	0	0	1
Calamaria gialaiensis	0	0	0	0	0	0	0	0	1
Calamaria grabowskyi	0	0	0	0	0	0	0	0	1
Calamaria gracillima	0	0	0	0	0	0	0	0	1
Calamaria griswoldi	0	0	0	0	0	0	0	0	1
Calamaria hilleniusi	0	0	0	0	0	0	0	0	1
Calamaria ingeri	0	0	0	0	0	0	0	0	1
Calamaria javanica	0	0	0	0	0	0	0	0	1
Calamaria joloensis	0	0	0	0	0	0	0	0	1
Calamaria lateralis	0	0	0	0	0	0	0	0	1
Calamaria lautensis	0	0	0	0	0	0	0	0	1
Calamaria leucogaster	0	0	0	0	0	0	0	0	1
Calamaria linnaei	0	0	0	0	0	0	0	0	1
Calamaria longirostris	0	0	0	0	0	0	0	0	1
Calamaria lovii	0	0	0	0	0	0	0	0	1
Calamaria lumbricoidea	0	0	0	0	0	0	0	0	1
Calamaria lumholtzi	0	0	0	0	0	0	0	0	1
Calamaria margaritophora	0	0	0	0	0	0	0	0	1
Calamaria mecheli	0	0	0	0	0	0	0	0	1
Calamaria melanota	0	0	0	0	0	0	0	0	1
Calamaria modesta	0	0	0	0	0	0	0	0	1
Calamaria muelleri	0	0	0	0	0	0	0	0	1
Calamaria nuchalis	0	0	0	0	0	0	0	0	1
Calamaria palawanensis	0	0	0	0	0	0	0	0	1
Calamaria pavimentata	0	0	0	0	1	1	0	0	1
Calamaria pfefferi	0	0	0	0	1	0	0	0	0
Calamaria prakkei	0	0	0	0	0	0	0	0	1
Calamaria rebentischi	0	0	0	0	0	0	0	0	1
Calamaria sangi	0	0	0	0	0	0	0	0	1
Calamaria schlegeli	0	0	0	0	0	0	0	0	1
Calamaria schmidti	0	0	0	0	0	0	0	0	1
Calamaria septentrionalis	0	0	0	0	1	0	0	0	0
Calamaria suluensis	0	0	0	0	0	0	0	0	1
Calamaria sumatrana	0	0	0	0	0	0	0	0	1
Calamaria thanhi	0	0	0	0	0	0	0	0	1
Calamaria ulmeri	0	0	0	0	0	0	0	0	1
Calamaria virgulata	0	0	0	0	0	0	0	0	1
Calamaria yunnanensis	0	0	0	0	1	0	0	0	0
Calamodontophis paucidens	0	0	0	0	0	0	0	1	0
Calamodontophis ronaldoi	0	0	0	0	0	0	0	1	0
Calamophis jobiensis	0	0	1	0	0	0	0	0	0
Calamophis katesandersae	0	0	1	0	0	0	0	0	0
Calamophis ruuddelangi	0	0	1	0	0	0	0	0	0
Calamophis sharonbrooksae	0	0	1	0	0	0	0	0	0
Calamorhabdium acuticeps	0	0	0	0	0	0	0	0	1
Calamorhabdium kuekenthali	0	0	1	0	0	0	0	0	0
Caledoniscincus aquilonius	0	0	1	0	0	0	0	0	0
Caledoniscincus atropunctatus	0	0	1	0	0	0	0	0	0
Caledoniscincus auratus	0	0	1	0	0	0	0	0	0
Caledoniscincus austrocaledonicus	0	0	1	0	0	0	0	0	0
Caledoniscincus chazeaui	0	0	1	0	0	0	0	0	0
Caledoniscincus constellatus	0	0	1	0	0	0	0	0	0
Caledoniscincus cryptos	0	0	1	0	0	0	0	0	0
Caledoniscincus festivus	0	0	1	0	0	0	0	0	0
Caledoniscincus haplorhinus	0	0	1	0	0	0	0	0	0
Caledoniscincus notialis	0	0	1	0	0	0	0	0	0
Caledoniscincus orestes	0	0	1	0	0	0	0	0	0
Caledoniscincus pelletieri	0	0	1	0	0	0	0	0	0
Caledoniscincus renevieri	0	0	1	0	0	0	0	0	0
Caledoniscincus terma	0	0	1	0	0	0	0	0	0
Calliophis beddomei	0	0	0	0	0	1	0	0	0
Calliophis bibroni	0	0	0	0	0	1	0	0	0
Calliophis bivirgata	0	0	0	0	0	0	0	0	1
Calliophis castoe	0	0	0	0	0	1	0	0	0
Calliophis gracilis	0	0	0	0	0	0	0	0	1
Calliophis haematoetron	0	0	0	0	0	1	0	0	0
Calliophis intestinalis	0	0	0	0	0	0	0	0	1
Calliophis maculiceps	0	0	0	0	1	1	0	0	1
Calliophis melanurus	0	0	0	0	1	1	0	0	0
Calliophis nigrescens	0	0	0	0	0	1	0	0	0
Callisaurus draconoides	0	0	0	0	0	0	1	0	0
Callopistes flavipunctatus	0	0	0	0	0	0	0	1	0
Callopistes maculatus	0	0	0	0	0	0	0	1	0
Calloselasma rhodostoma	0	0	0	0	1	0	0	0	1
Calodactylodes aureus	0	0	0	0	0	1	0	0	0
Calodactylodes illingworthorum	0	0	0	0	0	1	0	0	0
Calotes aurantolabium	0	0	0	0	0	1	0	0	0
Calotes bachae	0	0	0	0	0	0	0	0	1
Calotes bhutanensis	0	0	0	0	1	0	0	0	0
Calotes calotes	0	0	0	0	0	1	0	0	0
Calotes ceylonensis	0	0	0	0	0	1	0	0	0
Calotes chincollium	0	0	0	0	0	1	0	0	0
Calotes desilvai	0	0	0	0	0	1	0	0	0
Calotes ellioti	0	0	0	0	0	1	0	0	0
Calotes emma	0	0	0	0	1	1	0	0	1
Calotes grandisquamis	0	0	0	0	0	1	0	0	0
Calotes htunwini	0	0	0	0	1	1	0	0	0
Calotes irawadi	0	0	0	0	1	1	0	0	0
Calotes jerdoni	0	0	0	0	1	1	0	0	0
Calotes liocephalus	0	0	0	0	0	1	0	0	0
Calotes liolepis	0	0	0	0	0	1	0	0	0
Calotes manamendrai	0	0	0	0	0	1	0	0	0
Calotes maria	0	0	0	0	0	1	0	0	0
Calotes medogensis	0	0	0	0	1	0	0	0	0
Calotes mystaceus	0	0	0	0	1	1	0	0	1
Calotes nemoricola	0	0	0	0	0	1	0	0	0
Calotes nigrilabris	0	0	0	0	0	1	0	0	0
Calotes nigriplicatus	0	0	0	0	0	0	0	0	1
Calotes pethiyagodai	0	0	0	0	0	1	0	0	0
Calotes rouxii	0	0	0	0	0	1	0	0	0
Calotes versicolor	0	0	0	0	1	1	0	0	1
Calumma amber	1	0	0	0	0	0	0	0	0
Calumma ambreense	1	0	0	0	0	0	0	0	0
Calumma andringitraense	1	0	0	0	0	0	0	0	0
Calumma boettgeri	1	0	0	0	0	0	0	0	0
Calumma brevicorne	1	0	0	0	0	0	0	0	0
Calumma capuroni	1	0	0	0	0	0	0	0	0
Calumma crypticum	1	0	0	0	0	0	0	0	0
Calumma cucullatum	1	0	0	0	0	0	0	0	0
Calumma fallax	1	0	0	0	0	0	0	0	0
Calumma furcifer	1	0	0	0	0	0	0	0	0
Calumma gallus	1	0	0	0	0	0	0	0	0
Calumma gastrotaenia	1	0	0	0	0	0	0	0	0
Calumma glawi	1	0	0	0	0	0	0	0	0
Calumma globifer	1	0	0	0	0	0	0	0	0
Calumma guibei	1	0	0	0	0	0	0	0	0
Calumma guillaumeti	1	0	0	0	0	0	0	0	0
Calumma hafahafa	1	0	0	0	0	0	0	0	0
Calumma hilleniusi	1	0	0	0	0	0	0	0	0
Calumma jejy	1	0	0	0	0	0	0	0	0
Calumma malthe	1	0	0	0	0	0	0	0	0
Calumma marojezense	1	0	0	0	0	0	0	0	0
Calumma nasutum	1	0	0	0	0	0	0	0	0
Calumma oshaughnessyi	1	0	0	0	0	0	0	0	0
Calumma parsonii	1	0	0	0	0	0	0	0	0
Calumma peltierorum	1	0	0	0	0	0	0	0	0
Calumma peyrierasi	1	0	0	0	0	0	0	0	0
Calumma tarzan	1	0	0	0	0	0	0	0	0
Calumma tsaratananense	1	0	0	0	0	0	0	0	0
Calumma tsycorne	1	0	0	0	0	0	0	0	0
Calumma vatosoa	1	0	0	0	0	0	0	0	0
Calumma vencesi	1	0	0	0	0	0	0	0	0
Calumma vohibola	1	0	0	0	0	0	0	0	0
Calyptommatus confusionibus	0	0	0	0	0	0	0	1	0
Calyptommatus leiolepis	0	0	0	0	0	0	0	1	0
Calyptommatus nicterus	0	0	0	0	0	0	0	1	0
Calyptommatus sinebrachiatus	0	0	0	0	0	0	0	1	0
Calyptotis lepidorostrum	0	0	1	0	0	0	0	0	0
Calyptotis ruficauda	0	0	1	0	0	0	0	0	0
Calyptotis scutirostrum	0	0	1	0	0	0	0	0	0
Calyptotis temporalis	0	0	1	0	0	0	0	0	0
Calyptotis thorntonensis	0	0	1	0	0	0	0	0	0
Candoia aspera	0	0	1	0	0	0	0	0	0
Candoia bibroni	0	0	1	0	0	0	0	0	0
Candoia carinata	0	0	1	0	0	0	0	0	1
Candoia paulsoni	0	0	1	0	0	0	0	0	1
Candoia superciliosa	0	0	1	0	0	0	0	0	0
Cantoria violacea	0	0	0	0	1	0	0	0	1
Caparaonia itaiquara	0	0	0	0	0	0	0	1	0
Capitellum mariagalantae	0	0	0	1	0	0	0	0	0
Capitellum metallicum	0	0	0	1	0	0	0	0	0
Capitellum parvicruzae	0	0	0	1	0	0	0	0	0
Caraiba andreae	0	0	0	1	0	0	1	0	0
Carlia aenigma	0	0	1	0	0	0	0	0	0
Carlia ailanpalai	0	0	1	0	0	0	0	0	0
Carlia amax	0	0	1	0	0	0	0	0	0
Carlia aramia	0	0	1	0	0	0	0	0	0
Carlia babarensis	0	0	0	0	0	0	0	0	1
Carlia beccarii	0	0	0	0	0	0	0	0	1
Carlia bicarinata	0	0	1	0	0	0	0	0	0
Carlia bomberai	0	0	1	0	0	0	0	0	0
Carlia caesius	0	0	1	0	0	0	0	0	0
Carlia decora	0	0	1	0	0	0	0	0	0
Carlia diguliensis	0	0	1	0	0	0	0	0	0
Carlia dogare	0	0	1	0	0	0	0	0	0
Carlia eothen	0	0	1	0	0	0	0	0	0
Carlia fusca	0	0	1	0	0	0	0	0	1
Carlia gracilis	0	0	1	0	0	0	0	0	0
Carlia inconnexa	0	0	1	0	0	0	0	0	0
Carlia jarnoldae	0	0	1	0	0	0	0	0	0
Carlia johnstonei	0	0	1	0	0	0	0	0	0
Carlia leucotaenia	0	0	0	0	0	0	0	0	1
Carlia longipes	0	0	1	0	0	0	0	0	0
Carlia luctuosa	0	0	1	0	0	0	0	0	0
Carlia munda	0	0	1	0	0	0	0	0	0
Carlia mysi	0	0	1	0	0	0	0	0	0
Carlia nigrauris	0	0	0	0	0	0	0	0	1
Carlia pectoralis	0	0	1	0	0	0	0	0	0
Carlia peronii	0	0	0	0	0	0	0	0	1
Carlia pulla	0	0	1	0	0	0	0	0	0
Carlia quinquecarinata	0	0	1	0	0	0	0	0	0
Carlia rhomboidalis	0	0	1	0	0	0	0	0	0
Carlia rimula	0	0	1	0	0	0	0	0	0
Carlia rostralis	0	0	1	0	0	0	0	0	0
Carlia rubigo	0	0	1	0	0	0	0	0	0
Carlia rubrigularis	0	0	1	0	0	0	0	0	0
Carlia rufilatus	0	0	1	0	0	0	0	0	0
Carlia schmeltzii	0	0	1	0	0	0	0	0	0
Carlia sexdentata	0	0	1	0	0	0	0	0	0
[truncated: 7,756 more rows]

## Sheet: 9 Areas Processed
Tonini	AF	AU	CA	EU	IN	NA	SA	SU
Ablepharus_budaki	110010000
Ablepharus_chernovi	110010000
Ablepharus_grayanus	000011000
Ablepharus_kitaibelii	000010000
Abronia_anzuetoi	000000100
Abronia_aurita	000100100
Abronia_campbelli	000100000
Abronia_chiszari	000000100
Abronia_fimbriata	000000100
Abronia_frosti	000000100
Abronia_graminea	000000100
Abronia_lythrochila	000000100
Abronia_matudai	000000100
Abronia_mixteca	000000100
Abronia_oaxacae	000000100
Abronia_ornelasi	000000100
Acanthocercus_annectens	110000000
Acanthocercus_atricollis	100000000
Acanthocercus_cyanogaster	100000000
Acanthocercus_yemensis	010000000
Acanthodactylus_aureus	100000000
Acanthodactylus_bedriagai	100000000
Acanthodactylus_beershebensis	110000000
Acanthodactylus_blanci	100000000
Acanthodactylus_blanfordii	010011000
Acanthodactylus_boskianus	110010000
Acanthodactylus_busacki	100000000
Acanthodactylus_cantoris	000011000
Acanthodactylus_erythrurus	100010000
Acanthodactylus_felicis	010000000
Acanthodactylus_gongrorhynchatus	010000000
Acanthodactylus_grandis	010010000
Acanthodactylus_khamirensis	000010000
Acanthodactylus_lineomaculatus	100010000
Acanthodactylus_longipes	100000000
Acanthodactylus_maculatus	100010000
Acanthodactylus_masirae	010000000
Acanthodactylus_micropholis	010011000
Acanthodactylus_nilsoni	000010000
Acanthodactylus_opheodurus	110000000
Acanthodactylus_orientalis	010000000
Acanthodactylus_pardalis	100000000
Acanthodactylus_schmidti	110010000
Acanthodactylus_schreiberi	000010000
Acanthodactylus_scutellatus	110010000
Acanthodactylus_tristrami	110000000
Acanthophis_antarcticus	001000000
Acanthophis_praelongus	001000000
Acanthophis_pyrrhus	001000000
Acanthophis_rugosus	001000001
Acanthophis_wellsi	001000000
Acanthosaura_armata	000010001
Acanthosaura_capra	000000001
Acanthosaura_cardamomensis	000000001
Acanthosaura_crucigera	000010001
Acanthosaura_lepidogaster	000011001
Achalinus_meiguensis	000010000
Achalinus_rufescens	000010000
Acontias_aurantiacus	100000000
Acontias_bicolor	100000000
Acontias_breviceps	100000000
Acontias_cregoi	100000000
Acontias_gariepensis	100000000
Acontias_gracilicauda	100000000
Acontias_jappi	100000000
Acontias_kgalagadi	100000000
Acontias_lineatus	100000000
Acontias_litoralis	100000000
Acontias_meleagris	100000000
Acontias_namaquensis	100000000
Acontias_occidentalis	100000000
Acontias_orientalis	100000000
Acontias_percivali	100000000
Acontias_plumbeus	100000000
Acontias_poecilus	100000000
Acontias_richardi	100000000
Acontias_rieppeli	100000000
Acontias_tristis	100000000
Acrantophis_dumerili	100000000
Acrantophis_madagascariensis	100000000
Acratosaura_mentalis	000000010
Acrochordus_arafurae	001000000
Acrochordus_granulatus	001011001
Acrochordus_javanicus	000010001
Acutotyphlops_kunuaensis	001000000
Acutotyphlops_subocularis	001000000
Adelophis_foxi	000000100
Adelphicos_quadrivirgatum	000100100
Adolfus_africanus	100000000
Adolfus_alleni	100000000
Adolfus_jacksoni	100000000
Aeluroscalabotes_felinus	000000001
Afroablepharus_africanus	100000000
Afroablepharus_annobonensis	100000000
Afroablepharus_wahlbergi	100000000
Afroedura_africana	100000000
Afroedura_amatolica	100000000
Afroedura_bogerti	100000000
Afroedura_broadleyi	100000000
Afroedura_granitica	100000000
Afroedura_halli	100000000
Afroedura_hawequensis	100000000
Afroedura_karroica	100000000
Afroedura_langi	100000000
Afroedura_loveridgei	100000000
Afroedura_major	100000000
Afroedura_maripi	100000000
Afroedura_marleyi	100000000
Afroedura_multiporis	100000000
Afroedura_nivaria	100000000
Afroedura_pienaari	100000000
Afroedura_pondolia	100000000
Afroedura_pongola	100000000
Afroedura_tembulica	100000000
Afroedura_transvaalica	100000000
Afroedura_waterbergensis	100000000
Afrogecko_porphyreus	100000000
Afronatrix_anoscopus	100000000
Afrotyphlops_angolensis	100000000
Afrotyphlops_bibronii	100000000
Afrotyphlops_congestus	100000000
Afrotyphlops_elegans	100000000
Afrotyphlops_fornasinii	100000000
Afrotyphlops_lineolatus	100000000
Afrotyphlops_mucruso	100000000
Afrotyphlops_obtusus	100000000
Afrotyphlops_punctatus	100000000
Afrotyphlops_schlegelii	100000000
Agama_aculeata	100000000
Agama_africana	100000000
Agama_agama	100000000
Agama_anchietae	100000000
Agama_armata	100000000
Agama_atra	100000000
Agama_boensis	100000000
Agama_bottegi	100000000
Agama_boueti	100000000
Agama_boulengeri	100000000
Agama_caudospinosa	100000000
Agama_cristata	100000000
Agama_doriae	100000000
Agama_etoshae	100000000
Agama_finchi	100000000
Agama_gracilimembris	100000000
Agama_hartmanni	100000000
Agama_hispida	100000000
Agama_impalearis	100010000
Agama_insularis	100000000
Agama_kaimosae	100000000
Agama_kirkii	100000000
Agama_lebretoni	100000000
Agama_lionotus	100000000
Agama_montana	100000000
Agama_mossambica	100000000
Agama_mwanzae	100000000
Agama_parafricana	100000000
Agama_paragama	100000000
Agama_planiceps	100000000
Agama_robecchii	100000000
Agama_rueppelli	100000000
Agama_sankaranica	100000000
Agama_spinosa	110000000
Agama_tassiliensis	100000000
Agama_turuensis	100000000
Agama_weidholzi	100000000
Agamodon_anguliceps	100000000
Agamura_persica	010011000
Agkistrodon_bilineatus	000100100
Agkistrodon_contortrix	000000100
Agkistrodon_piscivorus	000000100
Agkistrodon_taylori	000000100
Ahaetulla_fronticincta	000011001
Ahaetulla_nasuta	000011000
Ahaetulla_prasina	001011001
Ahaetulla_pulverulenta	000001000
Ailuronyx_seychellensis	100000000
Ailuronyx_tachyscopaeus	100000000
Ailuronyx_trachygaster	100000000
Aipysurus_apraefrontalis	001000000
Aipysurus_duboisii	001000000
Aipysurus_eydouxii	001010001
Aipysurus_foliosquama	001000000
Aipysurus_fuscus	001000001
Aipysurus_laevis	001000001
Aipysurus_mosaicus	001000000
Alexandresaurus_camacan	000000010
Algyroides_fitzingeri	000010000
Algyroides_marchi	000010000
Algyroides_moreoticus	000010000
Algyroides_nigropunctatus	000010000
Alinea_berengerae	000100000
Alinea_pergravis	000100000
Alluaudina_bellyi	100000000
Alopoglossus_angulatus	000000010
Alopoglossus_atriventris	000000010
Alopoglossus_buckleyi	000000010
Alopoglossus_copii	000000010
Alopoglossus_festae	000000010
Alopoglossus_viridiceps	000000010
Alsophis_antiguae	000100000
Alsophis_antillensis	000100000
Alsophis_manselli	000100000
Alsophis_rijgersmaei	000100000
Alsophis_rufiventris	000100000
Alsophis_sajdaki	000100000
Alsophis_sibonius	000100000
Alsophylax_pipiens	000010000
Altiphylax_levitoni	000010000
Altiphylax_stoliczkai	000011000
Amalosia_lesueurii	001000000
Amalosia_obscura	001000000
Amalosia_rhombifer	001000000
Amastridium_veliferum	000100100
Amblyodipsas_dimidiata	100000000
Amblyodipsas_polylepis	100000000
Amblyrhynchus_cristatus	000000010
Ameiva_aggerecusans	000000010
Ameiva_ameiva	000100010
Ameiva_auberi	000100100
Ameiva_bifrontata	000100010
Ameiva_chrysolaema	000100000
Ameiva_concolor	000000010
Ameiva_corax	000100000
Ameiva_dorsalis	000100000
Ameiva_erythrocephala	000100000
Ameiva_exsul	000100000
Ameiva_fuscata	000100000
Ameiva_griswoldi	000100000
Ameiva_jacuba	000000010
Ameiva_lineolata	000100000
Ameiva_maynardi	000000100
Ameiva_nodam	000000010
Ameiva_parecis	000000010
Ameiva_plei	000100000
Ameiva_pluvianotata	000100000
Ameiva_polops	000100000
Ameiva_taeniura	000100000
Ameiva_wetmorei	000100000
Ameivula_abaetensis	000000010
Ameivula_ocellifera	000000010
Amerotyphlops_brongersmianus	000100010
Amerotyphlops_reticulatus	000000010
Amerotyphlops_tasymicris	000100000
Amerotyphlops_tycherus	000100000
Amphibolurus_muricatus	001000000
Amphibolurus_norrisi	001000000
Amphiesma_stolatum	000011001
Amphiglossus_anosyensis	100000000
Amphiglossus_ardouini	100000000
Amphiglossus_astrolabi	100000000
Amphiglossus_crenni	100000000
Amphiglossus_frontoparietalis	100000000
Amphiglossus_johannae	100000000
Amphiglossus_macrocercus	100000000
Amphiglossus_mandokava	100000000
Amphiglossus_melanurus	100000000
Amphiglossus_meva	100000000
Amphiglossus_ornaticeps	100000000
Amphiglossus_punctatus	100000000
Amphiglossus_reticulatus	100000000
Amphiglossus_splendidus	100000000
Amphiglossus_tanysoma	100000000
Amphiglossus_tsaratananensis	100000000
Amphisbaena_alba	000100010
Amphisbaena_anaemariae	000000010
Amphisbaena_angustifrons	000000010
Amphisbaena_anomala	000000010
Amphisbaena_bakeri	000100000
Amphisbaena_barbouri	000000100
Amphisbaena_bolivica	000000010
Amphisbaena_brasiliana	000000010
Amphisbaena_caeca	000100000
Amphisbaena_caiari	000000010
Amphisbaena_camura	000000010
Amphisbaena_carlgansi	000000100
Amphisbaena_cubana	000100100
Amphisbaena_cuiabana	000000010
Amphisbaena_cunhai	000000010
Amphisbaena_darwini	000000010
Amphisbaena_fenestrata	000100000
Amphisbaena_fuliginosa	000100010
Amphisbaena_hastata	000000010
Amphisbaena_hyporissor	000100000
Amphisbaena_ignatiana	000000010
Amphisbaena_infraorbitale	000000010
Amphisbaena_innocens	000100000
Amphisbaena_kingii	000000010
Amphisbaena_kraoh	000000010
Amphisbaena_leali	000100000
Amphisbaena_leeseri	000000010
Amphisbaena_manni	000100000
Amphisbaena_mertensii	000000010
Amphisbaena_microcephalum	000000010
Amphisbaena_munoai	000000010
Amphisbaena_polystegum	000000010
Amphisbaena_roberti	000000010
Amphisbaena_saxosa	000000010
Amphisbaena_schmidti	000100000
Amphisbaena_silvestrii	000000010
Amphisbaena_vermicularis	000000010
Amphisbaena_xera	000100000
Amplorhinus_multimaculatus	100000000
Anadia_mcdiarmidi	000000010
Anatololacerta_anatolica	000010000
Anatololacerta_danfordi	000010000
Androngo_trivittatus	100000000
Anelytropsis_papillosus	000000100
Anguis_cephallonica	000010000
Anguis_colchica	000010000
Anguis_fragilis	000010000
Anguis_graeca	000010000
Anguis_veronensis	000010000
Anilios_affinis	001000000
Anilios_ammodytes	001000000
Anilios_australis	001000000
Anilios_bicolor	001000000
Anilios_bituberculatus	001000000
Anilios_centralis	001000000
Anilios_diversus	001000000
Anilios_endoterus	001000000
Anilios_ganei	001000000
Anilios_grypus	001000000
Anilios_guentheri	001000000
Anilios_hamatus	001000000
Anilios_howi	001000000
Anilios_kimberleyensis	001000000
Anilios_leptosomus	001000000
Anilios_ligatus	001000000
Anilios_longissimus	001000000
Anilios_nigrescens	001000000
Anilios_pilbarensis	001000000
Anilios_pinguis	001000000
Anilios_polygrammicus	001000000
Anilios_proximus	001000000
Anilios_silvia	001000000
Anilios_splendidus	001000000
Anilios_troglodytes	001000000
Anilios_unguirostris	001000000
Anilios_waitii	001000000
Anilios_wiedii	001000000
Anilius_scytale	000000010
Anisolepis_grilli	000000010
Anisolepis_longicauda	000000010
Anniella_geronimensis	000000100
Anniella_pulchra	000000100
Anolis_acutus	000100000
Anolis_aeneus	000100010
Anolis_aequatorialis	000000010
Anolis_agassizi	000000010
Anolis_ahli	000000100
Anolis_alayoni	000100100
Anolis_alfaroi	000000100
Anolis_aliniger	000100000
Anolis_allisoni	000100100
Anolis_allogus	000100100
Anolis_altae	000100000
Anolis_altitudinalis	000000100
Anolis_alumina	000100000
Anolis_alutaceus	000100100
Anolis_anatoloros	000000010
Anolis_angusticeps	000100100
Anolis_annectens	000000010
Anolis_anoriensis	000000010
Anolis_aquaticus	000100000
Anolis_argenteolus	000100100
Anolis_argillaceus	000100100
Anolis_armouri	000100000
Anolis_auratus	000100010
Anolis_bahorucoensis	000100000
Anolis_baleatus	000100000
Anolis_baracoae	000100100
Anolis_barahonae	000100000
Anolis_barbatus	000000100
Anolis_barbouri	000100000
Anolis_bartschi	000000100
Anolis_benedikti	000100000
Anolis_bicaorum	000100000
Anolis_bimaculatus	000100000
Anolis_biporcatus	000100110
Anolis_bitectus	000000010
Anolis_bombiceps	000000010
Anolis_bonairensis	000100010
Anolis_boulengerianus	000000100
Anolis_brasiliensis	000000010
Anolis_bremeri	000000100
Anolis_brevirostris	000100000
Anolis_brunneus	000000100
Anolis_calimae	000000010
Anolis_capito	000100110
Anolis_carlliebi	000000100
Anolis_carolinensis	000000100
Anolis_carpenteri	000100000
Anolis_casildae	000100000
Anolis_caudalis	000100000
Anolis_centralis	000100100
Anolis_chamaeleonides	000000100
Anolis_chloris	000100010
Anolis_chlorocyanus	000100000
Anolis_chocorum	000100010
Anolis_christophei	000100000
Anolis_chrysolepis	000100010
Anolis_chrysops	000100000
Anolis_clivicola	000000100
Anolis_coelestinus	000100000
Anolis_confusus	000000100
Anolis_conspersus	000000100
Anolis_cooki	000100000
Anolis_crassulus	000100100
Anolis_cristatellus	000100000
Anolis_cupeyalensis	000000100
Anolis_cupreus	000100000
Anolis_cusuco	000100000
Anolis_cuvieri	000100000
Anolis_cyanopleurus	000100100
Anolis_cybotes	000100000
Anolis_danieli	000000010
Anolis_darlingtoni	000100000
Anolis_desechensis	000100000
Anolis_desiradei	000100000
Anolis_dissimilis	000000010
Anolis_distichus	000100100
Anolis_dolichocephalus	000100000
Anolis_dunni	000000100
Anolis_equestris	000000100
Anolis_ernestwilliamsi	000100000
Anolis_etheridgei	000100000
Anolis_eugenegrahami	000100000
Anolis_euskalerriari	000000010
Anolis_evermanni	000100000
Anolis_extremus	000100010
Anolis_ferreus	000100000
Anolis_festae	000000010
Anolis_fitchi	000000010
Anolis_fortunensis	000100000
Anolis_fowleri	000100000
Anolis_fraseri	000000010
Anolis_frenatus	000100010
Anolis_fuscoauratus	000100010
Anolis_gadovii	000000100
Anolis_gaigei	000100010
Anolis_garmani	000100100
Anolis_garridoi	000000100
Anolis_gemmosus	000000010
Anolis_ginaelisae	000100000
Anolis_gingivinus	000100000
Anolis_grahami	000100000
Anolis_griseus	000100000
Anolis_gruuo	000100000
Anolis_guafe	000000100
Anolis_guamuhaya	000000100
Anolis_guazuma	000000100
Anolis_gundlachi	000100000
Anolis_haetianus	000100000
Anolis_hendersoni	000100000
Anolis_heterodermus	000000010
Anolis_homolechis	000100100
Anolis_huilae	000000010
Anolis_humilis	000100010
Anolis_ibanezi	000100000
Anolis_imias	000100100
Anolis_immaculogularis	000000100
Anolis_inderenae	000000010
Anolis_inexpectatus	000000100
Anolis_insignis	000100010
Anolis_insolitus	000100000
Anolis_intermedius	000100000
Anolis_isolepis	000100100
Anolis_jacare	000000010
Anolis_jubar	000100100
Anolis_kemptoni	000100000
Anolis_koopmani	000100000
Anolis_krugi	000100000
Anolis_kunayalae	000100000
Anolis_laeviventris	000100100
Anolis_leachii	000100000
Anolis_lemurinus	000100110
Anolis_limifrons	000100010
Anolis_lineatopus	000100000
Anolis_lineatus	000100010
Anolis_liogaster	000000100
Anolis_lionotus	000100110
Anolis_lividus	000100000
Anolis_longiceps	000100000
Anolis_longitibialis	000100000
Anolis_loveridgei	000100000
Anolis_loysiana	000000100
Anolis_luciae	000100010
Anolis_lucius	000000100
Anolis_luteogularis	000000100
Anolis_macilentus	000000100
Anolis_macrinii	000000100
Anolis_maculigula	000000010
Anolis_magnaphallus	000100000
Anolis_marcanoi	000100000
Anolis_marmoratus	000100000
Anolis_marron	000100000
Anolis_maynardi	000000100
Anolis_medemi	000000010
Anolis_megapholidotus	000000100
Anolis_meridionalis	000000010
Anolis_mestrei	000000100
Anolis_microlepidotus	000000100
Anolis_microtus	000100000
Anolis_monensis	000100000
Anolis_monteverde	000100000
Anolis_monticola	000100000
Anolis_neblininus	000000010
Anolis_nebuloides	000000100
Anolis_nebulosus	000000100
Anolis_nicefori	000000010
Anolis_nietoi	000000100
Anolis_noblei	000100100
Anolis_nubilus	000100000
Anolis_occultus	000100000
Anolis_ocelloscapularis	000100000
Anolis_oculatus	000100000
Anolis_olssoni	000100000
Anolis_omiltemanus	000000100
Anolis_onca	000100010
Anolis_opalinus	000100000
Anolis_ophiolepis	000000100
Anolis_oporinus	000000100
Anolis_ortonii	000000010
Anolis_osa	000100000
Anolis_otongae	000000010
Anolis_oxylophus	000100000
Anolis_pachypus	000100000
Anolis_paternus	000000100
Anolis_peraccae	000000010
Anolis_peucephilus	000000100
Anolis_philopunctatus	000000010
Anolis_phyllorhinus	000000010
Anolis_placidus	000100000
Anolis_planiceps	000100010
Anolis_podocarpus	000000010
Anolis_poecilopus	000100010
Anolis_poei	000000010
Anolis_pogus	000100000
Anolis_polylepis	000100000
Anolis_poncensis	000100000
Anolis_porcatus	000100100
Anolis_porcus	000100100
Anolis_princeps	000000010
Anolis_pseudokemptoni	000100000
Anolis_pseudopachypus	000100000
Anolis_pulchellus	000100000
Anolis_pumilus	000000100
Anolis_punctatus	000000010
Anolis_purpurgularis	000100000
Anolis_quadriocellifer	000000100
Anolis_quaggulus	000100000
Anolis_quercorum	000000100
Anolis_reconditus	000100000
Anolis_rejectus	000100100
Anolis_richardii	000100000
Anolis_ricordii	000100000
Anolis_rodriguezi	000100000
Anolis_roquet	000100000
Anolis_rubribarbus	000000100
Anolis_sabanus	000100000
Anolis_sacamecatensis	000000100
Anolis_sagrei	000100100
Anolis_schwartzi	000100000
Anolis_scriptus	000000100
Anolis_semilineatus	000100000
Anolis_sericeus	000100100
Anolis_sheplani	000100000
Anolis_shrevei	000100000
Anolis_singularis	000100000
Anolis_smallwoodi	000100100
Anolis_smaragdinus	000000100
Anolis_sminthus	000100000
Anolis_stevepoei	000000100
Anolis_strahmi	000100000
Anolis_stratulus	000100000
Anolis_subocularis	000000100
Anolis_taylori	000000100
Anolis_tenorioensis	000100000
Anolis_terraealtae	000100000
Anolis_tigrinus	000100010
Anolis_townsendi	000000100
Anolis_trachyderma	000000010
Anolis_transversalis	000000010
Anolis_trinitatis	000100000
Anolis_tropidogaster	000100010
Anolis_tropidolepis	000100000
Anolis_tropidonotus	000100100
Anolis_uniformis	000100100
Anolis_unilobatus	000100100
Anolis_utilensis	000100000
Anolis_valencienni	000100000
Anolis_vanidicus	000000100
Anolis_vanzolinii	000000010
Anolis_ventrimaculatus	000000010
Anolis_vermiculatus	000000100
Anolis_wattsi	000100000
Anolis_websteri	000100000
Anolis_whitemani	000100000
Anolis_woodi	000100000
Anolis_yoroensis	000100000
Anolis_zapotecorum	000000100
Anolis_zeus	000100000
Anomalopus_brevicollis	001000000
Anomalopus_gowi	001000000
Anomalopus_leuckartii	001000000
Anomalopus_mackayi	001000000
Anomalopus_pluto	001000000
Anomalopus_swansoni	001000000
Anomalopus_verreauxi	001000000
Anomochilus_leonardi	000000001
Anotosaura_collaris	000000010
Anotosaura_vanzolinia	000000010
Antaresia_childreni	001000000
Antaresia_maculosa	001000000
Antaresia_perthensis	001000000
Antaresia_stimsoni	001000000
Aparallactus_capensis	100000000
Aparallactus_guentheri	100000000
Aparallactus_modestus	100000000
Aparallactus_werneri	100000000
Apathya_cappadocica	110010000
Apathya_yassujica	000010000
Aphaniotis_fusca	000000001
Aplopeltura_boa	000000001
Apostolepis_albicollaris	000000010
Apostolepis_assimilis	000000010
Apostolepis_cearensis	000000010
Apostolepis_dimidiata	000000010
Apostolepis_flavotorquata	000000010
Aprasia_aurita	001000000
Aprasia_inaurita	001000000
Aprasia_parapulchella	001000000
Aprasia_picturata	001000000
Aprasia_pseudopulchella	001000000
Aprasia_pulchella	001000000
Aprasia_repens	001000001
Aprasia_smithi	001000000
Aprasia_striolata	001000000
Archaeolacerta_bedriagae	000010000
Archaius_tigris	100000000
Archelaphe_bella	000011000
Argyrophis_diardii	000011001
Argyrophis_muelleri	000010001
Aristelliger_georgeensis	000100100
Aristelliger_lar	000100000
Aristelliger_praesignis	000100100
Arizona_elegans	000000100
Arrhyton_dolichura	000000100
Arrhyton_procerum	000000100
Arrhyton_supernum	000000100
Arrhyton_taeniatum	000100100
Arrhyton_tanyplectum	000000100
Arrhyton_vittatum	000000100
Arthrosaura_guianensis	000000010
Arthrosaura_hoogmoedi	000000010
Arthrosaura_kockii	000000010
Arthrosaura_reticulata	000000010
Asaccus_caudivolvulus	010000000
Asaccus_elisae	010010000
Asaccus_gallagheri	010000000
Asaccus_griseonotus	010010000
Asaccus_montanus	010000000
Asaccus_nasrullahi	000010000
Asaccus_platyrhynchus	010000000
Aspidelaps_lubricus	100000000
Aspidelaps_scutatus	100000000
Aspidites_melanocephalus	001000000
Aspidites_ramsayi	001000000
Aspidomorphus_lineaticollis	001000000
Aspidomorphus_muelleri	001000001
Aspidomorphus_schlegelii	001000000
Aspidoscelis_angusticeps	000000100
Aspidoscelis_burti	000000100
Aspidoscelis_ceralbensis	000000100
Aspidoscelis_communis	000000100
Aspidoscelis_costata	000000100
Aspidoscelis_cozumelae	000000100
Aspidoscelis_deppei	000100100
Aspidoscelis_gularis	000000100
Aspidoscelis_guttata	000000100
Aspidoscelis_hyperythra	000000100
Aspidoscelis_inornata	000000100
Aspidoscelis_laredoensis	000000100
Aspidoscelis_lineattissima	000000100
Aspidoscelis_marmorata	000000100
Aspidoscelis_maslini	000000100
Aspidoscelis_maxima	000000100
Aspidoscelis_rodecki	000000100
Aspidoscelis_scalaris	000000100
Aspidoscelis_sexlineata	000000100
Aspidoscelis_stictogramma	000000100
Aspidoscelis_tigris	000000100
Aspidoscelis_uniparens	000000100
Aspidoscelis_velox	000000100
Aspidura_ceylonensis	000001000
Aspidura_drummondhayi	000001000
Aspidura_guentheri	000001000
Aspidura_trachyprocta	000001000
Aspronema_cochabambae	000000010
Aspronema_dorsivittatum	000000010
Asthenodipsas_laevis	000000001
Asthenodipsas_lasgalenensis	000000001
Asthenodipsas_tropidonotus	000000001
Asthenodipsas_vertebralis	000000001
Asymblepharus_himalayanus	000011000
Ateuchosaurus_pellopleurus	000010000
Atheris_barbouri	100000000
Atheris_ceratophora	100000000
Atheris_chlorechis	100000000
Atheris_desaixi	100000000
Atheris_hispida	100000000
Atheris_matildae	100000000
Atheris_nitschei	100000000
Atheris_squamigera	100000000
Atlantolacerta_andreanskyi	100000000
Atractaspis_bibronii	100000000
Atractaspis_boulengeri	100000000
Atractaspis_corpulenta	100000000
Atractaspis_irregularis	100000000
Atractaspis_microlepidota	110000000
Atractaspis_micropholis	100000000
Atractus_albuquerquei	000000010
Atractus_badius	000000010
Atractus_elaps	000000010
Atractus_flammigerus	000000010
Atractus_reticulatus	000000010
Atractus_schach	000000010
Atractus_trihedrurus	000000010
Atractus_wagleri	000000010
Atractus_zebrinus	000000010
Atractus_zidoki	000000010
Atretium_schistosum	000011000
Atretium_yunnanensis	000010000
Atropoides_indomitus	000100000
Atropoides_mexicanus	000100100
Atropoides_nummifer	000000100
Atropoides_occiduus	000100100
Atropoides_olmec	000000100
Atropoides_picadoi	000100000
Aurivela_longicauda	000000010
Australolacerta_australis	100000000
Austrelaps_labialis	001000000
Austrelaps_superbus	001000000
Azemiops_feae	000011000
Bachia_barbouri	000000010
Bachia_bicolor	000000010
Bachia_bresslaui	000000010
Bachia_dorbignyi	000000010
Bachia_flavescens	000100010
Bachia_heteropa	000100010
Bachia_huallagana	000000010
Bachia_intermedia	000000010
Bachia_panoplia	000000010
Bachia_peruana	000000010
Bachia_scaea	000000010
Bachia_scolecoides	000000010
Bachia_trisanale	000000010
Balanophis_ceylonensis	000001000
Bamanophis_dorri	100000000
Barisia_herrerae	000000100
Barisia_imbricata	000000100
Barisia_levicollis	000000100
Barisia_rudicollis	000000100
Basiliscus_basiliscus	000100010
Basiliscus_galeritus	000100010
Basiliscus_plumifrons	000100000
Basiliscus_vittatus	000100100
Bassiana_duperreyi	001000000
Bassiana_platynota	001000000
Bassiana_trilineata	001000000
Bavayia_crassicollis	001000000
Bavayia_cyclura	001000000
Bavayia_exsuccida	001000000
Bavayia_geitaina	001000000
Bavayia_goroensis	001000000
Bavayia_montana	001000000
Bavayia_nubila	001000000
Bavayia_ornata	001000000
Bavayia_pulchella	001000000
Bavayia_robusta	001000000
Bavayia_sauvagii	001000000
Bavayia_septuiclavis	001000000
Bellatorias_frerei	001000000
Bellatorias_major	001000000
Bipes_biporus	000000100
Bipes_canaliculatus	000000100
Bipes_tridactylus	000000100
Bitia_hydroides	000011001
Bitis_arietans	110000000
Bitis_armata	100000000
Bitis_atropos	100000000
Bitis_caudalis	100000000
Bitis_cornuta	100000000
Bitis_gabonica	100000000
Bitis_nasicornis	100000000
Bitis_parviocula	100000000
Bitis_peringueyi	100000000
Bitis_rhinoceros	100000000
Bitis_rubida	100000000
Bitis_schneideri	100000000
Bitis_worthingtoni	100000000
Bitis_xeropaga	100000000
Blaesodactylus_ambonihazo	100000000
Blaesodactylus_antongilensis	100000000
Blaesodactylus_boivini	100000000
Blaesodactylus_sakalava	100000000
Blanus_alexandri	010010000
Blanus_aporus	110010000
Blanus_cinereus	000010000
Blanus_mariae	000010000
Blanus_mettetali	100010000
Blanus_strauchi	110010000
Blanus_tingitanus	100010000
Boa_constrictor	000100110
Boaedon_capensis	100000000
Boaedon_fuliginosus	110000000
Boaedon_lineatus	100000000
Boaedon_olivaceus	100000000
Boaedon_virgatus	100000000
Bogertophis_rosaliae	000000100
Bogertophis_subocularis	000000100
Boiga_barnesii	000001000
Boiga_beddomei	000001000
Boiga_ceylonensis	000001000
Boiga_cynodon	000000001
Boiga_dendrophila	000010001
Boiga_forsteni	000011000
Boiga_irregularis	001000001
Boiga_kraepelini	000010001
Boiga_multomaculata	000010000
Boiga_trigonata	010011000
Boiruna_maculata	000000010
Borikenophis_portoricensis	000100000
Borikenophis_variegatus	000100000
Bothriechis_aurifer	000000100
Bothriechis_bicolor	000000100
Bothriechis_guifarroi	000100000
Bothriechis_lateralis	000100000
Bothriechis_marchi	000100000
Bothriechis_nigroviridis	000100000
Bothriechis_rowleyi	000000100
Bothriechis_schlegelii	000100110
Bothriechis_supraciliaris	000100000
Bothriechis_thalassinus	000100000
Bothrochilus_albertisii	001000000
Bothrochilus_boa	001000000
Bothrocophias_campbelli	000000010
Bothrocophias_hyoprora	000000010
Bothrocophias_microphthalmus	000000010
Bothrolycus_ater	100000000
Bothrophthalmus_brunneus	100000000
Bothrophthalmus_lineatus	100000000
Bothrops_alcatraz	000000010
Bothrops_alternatus	000000010
Bothrops_ammodytoides	000000010
Bothrops_asper	000100110
Bothrops_atrox	000000010
Bothrops_bilineata	000000010
Bothrops_brazili	000000010
Bothrops_caribbaeus	000100000
Bothrops_chloromelas	000000010
Bothrops_cotiara	000000010
Bothrops_diporus	000000010
Bothrops_erythromelas	000000010
Bothrops_fonsecai	000000010
Bothrops_insularis	000000010
Bothrops_itapetiningae	000000010
Bothrops_jararaca	000000010
Bothrops_jararacussu	000000010
Bothrops_lanceolatus	000100000
Bothrops_leucurus	000000010
Bothrops_lojanus	000000010
Bothrops_lutzi	000000010
Bothrops_marajoensis	000000010
Bothrops_marmoratus	000000010
Bothrops_matogrossensis	000000010
Bothrops_moojeni	000000010
Bothrops_neuwiedi	000000010
Bothrops_osbornei	000000010
Bothrops_pauloensis	000000010
Bothrops_pictus	000000010
Bothrops_pubescens	000000010
Bothrops_pulchra	000000010
Bothrops_punctatus	000100010
Bothrops_taeniata	000000010
Brachylophus_fasciatus	001000000
Brachylophus_vitiensis	001000000
Brachymeles_apus	000000001
Brachymeles_bicolandia	000000001
Brachymeles_bicolor	000000001
Brachymeles_boholensis	000000001
Brachymeles_bonitae	000000001
Brachymeles_boulengeri	000000001
Brachymeles_brevidactylus	000000001
Brachymeles_cebuensis	000000001
Brachymeles_cobos	000000001
Brachymeles_elerae	000000001
Brachymeles_gracilis	000000001
Brachymeles_hilong	000000001
Brachymeles_libayani	000000001
Brachymeles_lukbani	000000001
Brachymeles_makusog	000000001
Brachymeles_mindorensis	000000001
Brachymeles_minimus	000000001
Brachymeles_miriamae	000000001
Brachymeles_muntingkamay	000000001
Brachymeles_pathfinderi	000000001
Brachymeles_samad	000000001
Brachymeles_samarensis	000000001
Brachymeles_schadenbergi	000000001
Brachymeles_talinis	000000001
Brachymeles_taylori	000000001
Brachymeles_tiboliorum	000000001
Brachymeles_tridactylus	000000001
Brachymeles_vulcani	000000001
Brachyophidium_rhodogaster	000001000
Brachyorrhos_raffrayi	001000000
Brachyorrhos_wallacei	001000000
Brachyurophis_approximans	001000000
Brachyurophis_australis	001000000
Brachyurophis_incinctus	001000000
Brachyurophis_morrisi	001000000
Brachyurophis_roperi	001000000
Brachyurophis_semifasciatus	001000000
Bradypodion_atromontanum	100000000
Bradypodion_caeruleogula	100000000
Bradypodion_caffer	100000000
Bradypodion_damaranum	100000000
Bradypodion_dracomontanum	100000000
Bradypodion_gutturale	100000000
Bradypodion_kentanicum	100000000
Bradypodion_melanocephalum	100000000
Bradypodion_nemorale	100000000
Bradypodion_ngomeense	100000000
Bradypodion_occidentale	100000000
Bradypodion_pumilum	100000000
Bradypodion_setaroi	100000000
Bradypodion_taeniabronchum	100000000
Bradypodion_thamnobates	100000000
Bradypodion_transvaalense	100000000
Bradypodion_ventrale	100000000
Brasiliscincus_agilis	000000010
Brasiliscincus_caissara	000000010
Brasiliscincus_heathi	000000010
Broadleysaurus_major	110000000
Bronchocela_cristatella	001010001
Brookesia_ambreensis	100000000
Brookesia_antakarana	100000000
Brookesia_betschi	100000000
Brookesia_bonsi	100000000
Brookesia_brunoi	100000000
Brookesia_brygooi	100000000
Brookesia_confidens	100000000
Brookesia_decaryi	100000000
Brookesia_dentata	100000000
Brookesia_desperata	100000000
Brookesia_ebenaui	100000000
Brookesia_exarmata	100000000
Brookesia_griveaudi	100000000
Brookesia_karchei	100000000
Brookesia_lineata	100000000
Brookesia_micra	100000000
Brookesia_minima	100000000
Brookesia_perarmata	100000000
Brookesia_peyrierasi	100000000
Brookesia_ramanantsoai	100000000
Brookesia_stumpffi	100000000
Brookesia_superciliaris	100000000
Brookesia_therezieni	100000000
Brookesia_thieli	100000000
Brookesia_tristis	100000000
Brookesia_tuberculata	100000000
Brookesia_vadoni	100000000
Brookesia_valerieae	100000000
Bufoniceps_laungwalaensis	000001000
Buhoma_depressiceps	100000000
Buhoma_procterae	100000000
Bungarus_bungaroides	000011000
Bungarus_caeruleus	000011000
Bungarus_candidus	000010001
Bungarus_ceylonicus	000001000
Bungarus_fasciatus	000011001
Bungarus_flaviceps	000000001
Bungarus_multicinctus	000011001
Bungarus_niger	000011000
Bungarus_sindanus	000011000
Bungarus_slowinskii	000010001
Bunopus_crassicauda	000010000
Bunopus_tuberculatus	110011000
Caaeteboia_amarali	000000010
Cacophis_krefftii	001000000
Cacophis_squamulosus	001000000
Cadea_blanoides	000000100
Calabaria_reinhardtii	100000000
Calamaria_pavimentata	000011001
Calamaria_septentrionalis	000010000
Calamaria_yunnanensis	000010000
Calamodontophis_paucidens	000000010
Caledoniscincus_aquilonius	001000000
Caledoniscincus_atropunctatus	001000000
Caledoniscincus_auratus	001000000
Caledoniscincus_austrocaledonicus	001000000
Caledoniscincus_chazeaui	001000000
Caledoniscincus_constellatus	001000000
Caledoniscincus_cryptos	001000000
Caledoniscincus_festivus	001000000
Caledoniscincus_haplorhinus	001000000
Caledoniscincus_orestes	001000000
Caledoniscincus_renevieri	001000000
Caledoniscincus_terma	001000000
Calliophis_bivirgata	000000001
Calliophis_castoe	000001000
Calliophis_melanurus	000011000
Calliophis_nigrescens	000001000
Callisaurus_draconoides	000000100
Callopistes_flavipunctatus	000000010
Callopistes_maculatus	000000010
Calloselasma_rhodostoma	000010001
Calodactylodes_aureus	000001000
Calodactylodes_illingworthorum	000001000
Calotes_calotes	000001000
Calotes_ceylonensis	000001000
Calotes_chincollium	000001000
Calotes_emma	000011001
Calotes_htunwini	000011000
Calotes_irawadi	000011000
Calotes_jerdoni	000011000
Calotes_liocephalus	000001000
Calotes_liolepis	000001000
Calotes_mystaceus	000011001
Calotes_nigrilabris	000001000
Calotes_versicolor	000011001
Calumma_amber	100000000
Calumma_ambreense	100000000
Calumma_andringitraense	100000000
Calumma_boettgeri	100000000
Calumma_brevicorne	100000000
Calumma_capuroni	100000000
Calumma_crypticum	100000000
Calumma_cucullatum	100000000
Calumma_fallax	100000000
Calumma_furcifer	100000000
Calumma_gallus	100000000
Calumma_gastrotaenia	100000000
Calumma_glawi	100000000
Calumma_globifer	100000000
Calumma_guibei	100000000
Calumma_guillaumeti	100000000
Calumma_hafahafa	100000000
Calumma_hilleniusi	100000000
Calumma_malthe	100000000
Calumma_marojezense	100000000
Calumma_nasutum	100000000
Calumma_oshaughnessyi	100000000
Calumma_parsonii	100000000
Calumma_peltierorum	100000000
Calumma_peyrierasi	100000000
Calumma_tarzan	100000000
Calumma_tsaratananense	100000000
Calumma_vencesi	100000000
Calumma_vohibola	100000000
Calyptommatus_confusionibus	000000010
Calyptommatus_leiolepis	000000010
Calyptommatus_nicterus	000000010
Calyptommatus_sinebrachiatus	000000010
Calyptotis_lepidorostrum	001000000
Calyptotis_ruficauda	001000000
Calyptotis_scutirostrum	001000000
Calyptotis_temporalis	001000000
Candoia_aspera	001000000
Candoia_bibroni	001000000
Candoia_carinata	001000001
Candoia_superciliosa	001000000
Cantoria_violacea	000010001
Caparaonia_itaiquara	000000010
Caraiba_andreae	000100100
Carlia_aenigma	001000000
Carlia_ailanpalai	001000000
Carlia_amax	001000000
Carlia_bicarinata	001000000
Carlia_decora	001000000
Carlia_dogare	001000000
Carlia_eothen	001000000
Carlia_fusca	001000001
Carlia_gracilis	001000000
Carlia_inconnexa	001000000
Carlia_jarnoldae	001000000
Carlia_johnstonei	001000000
Carlia_longipes	001000000
Carlia_luctuosa	001000000
Carlia_munda	001000000
Carlia_mysi	001000000
Carlia_pectoralis	001000000
Carlia_pulla	001000000
Carlia_quinquecarinata	001000000
Carlia_rhomboidalis	001000000
Carlia_rostralis	001000000
Carlia_rubigo	001000000
Carlia_rubrigularis	001000000
Carlia_rufilatus	001000000
Carlia_schmeltzii	001000000
Carlia_sexdentata	001000000
Carlia_storri	001000000
Carlia_tetradactyla	001000000
Carlia_triacantha	001000000
Carlia_vivax	001000000
Carphodactylus_laevis	001000000
Carphophis_amoenus	000000100
Carphophis_vermis	000000100
Casarea_dussumieri	100000000
Causus_defilippii	100000000
Causus_resimus	100000000
Causus_rhombeatus	100000000
Celatiscincus_euryotis	001000000
Celatiscincus_similis	001000000
Celestus_agasepsoides	000100000
Celestus_enneagrammus	000000100
Celestus_haetianus	000100000
Cemophora_coccinea	000000100
Cerastes_cerastes	110000000
Cerastes_gasperettii	110010000
Cerastes_vipera	110000000
Ceratophora_aspera	000001000
Ceratophora_erdeleni	000001000
Ceratophora_karu	000001000
Ceratophora_stoddartii	000001000
Ceratophora_tennentii	000001000
Cerberus_australis	001000000
Cerberus_microlepis	000000001
Cerberus_rynchops	000011001
Cercosaura_argulus	000000010
Cercosaura_eigenmanni	000000010
Cercosaura_ocellata	000000010
Cercosaura_quadrilineata	000000010
Cercosaura_schreibersii	000000010
Cerrophidion_godmani	000100100
Cerrophidion_petlalcalensis	000000100
Cerrophidion_tzotzilorum	000000100
Cerrophidion_wilsoni	000100000
Chalarodon_madagascariensis	100000000
Chalcides_bedriagai	000010000
Chalcides_boulengeri	100000000
Chalcides_chalcides	100010000
Chalcides_coeruleopunctatus	100000000
Chalcides_colosii	100010000
Chalcides_guentheri	110000000
Chalcides_lanzai	100000000
Chalcides_manueli	100000000
Chalcides_mauritanicus	100010000
Chalcides_mertensi	100010000
Chalcides_minutus	100000000
Chalcides_mionecton	100010000
Chalcides_montanus	100010000
Chalcides_ocellatus	110011000
Chalcides_parallelus	100010000
Chalcides_polylepis	100010000
Chalcides_pseudostriatus	100010000
Chalcides_sepsoides	110000000
Chalcides_sexlineatus	100000000
Chalcides_sphenopsiformis	100000000
Chalcides_striatus	000010000
Chalcides_viridanus	100000000
Chamaeleo_africanus	110010000
Chamaeleo_anchietae	100000000
Chamaeleo_arabicus	010000000
Chamaeleo_calcaricarens	110000000
Chamaeleo_calyptratus	010000000
Chamaeleo_chamaeleon	110010000
Chamaeleo_dilepis	100000000
Chamaeleo_gracilis	110000000
Chamaeleo_laevigatus	110000000
Chamaeleo_monachus	100000000
Chamaeleo_namaquensis	100000000
Chamaeleo_necasi	100000000
Chamaeleo_senegalensis	100000000
Chamaeleo_zeylanicus	000001000
Chamaesaura_aenea	100000000
Chamaesaura_anguina	100000000
Chamaesaura_tenuior	100000000
Charina_bottae	000000100
Charina_umbratica	000000100
Chatogekko_amazonicus	000000010
Chelosania_brunnea	001000000
Chilabothrus_angulifer	000100100
Chilabothrus_chrysogaster	000000100
Chilabothrus_exsul	000000100
Chilabothrus_fordii	000100000
Chilabothrus_gracilis	000100000
Chilabothrus_inornatus	000100000
Chilabothrus_monensis	000100000
Chilabothrus_striatus	000100000
Chilabothrus_strigilatus	000000100
Chilabothrus_subflavus	000100000
Chilomeniscus_stramineus	000000100
Chionactis_occipitalis	000000100
Chionactis_palarostris	000000100
Chioninia_coctei	100000000
Chioninia_delalandii	100000000
Chioninia_fogoensis	100000000
Chioninia_nicolauensis	100000000
Chioninia_spinalis	100000000
Chioninia_stangeri	100000000
Chioninia_vaillantii	100000000
Chirindia_swynnertoni	100000000
Chironius_bicarinatus	000000010
Chironius_carinatus	000100010
Chironius_exoletus	000100010
Chironius_flavolineatus	000000010
Chironius_foveatus	000000010
Chironius_fuscus	000000010
Chironius_grandisquamis	000100010
Chironius_laevicollis	000000010
Chironius_laurenti	000000010
Chironius_monticola	000000010
Chironius_multiventris	000000010
Chironius_quadricarinatus	000000010
Chironius_scurrulus	000000010
Chlamydosaurus_kingii	001000001
Chondrodactylus_angulifer	100000000
Chondrodactylus_bibronii	100000000
Chondrodactylus_fitzsimonsi	100000000
Chondrodactylus_turneri	100000000
Christinus_alexanderi	001000000
Christinus_guentheri	001000000
Christinus_marmoratus	001000000
Chrysopelea_ornata	000011001
Chrysopelea_paradisi	000000001
Chrysopelea_taprobanica	000001000
Clelia_clelia	000100110
Clonophis_kirtlandii	000000100
Cnemaspis_affinis	000000001
Cnemaspis_africana	100000000
Cnemaspis_argus	000000001
Cnemaspis_aurantiacopes	000000001
Cnemaspis_baueri	000000001
Cnemaspis_bayuensis	000000001
Cnemaspis_bidongensis	000000001
Cnemaspis_biocellata	000000001
Cnemaspis_boulengerii	000000001
Cnemaspis_caudanivea	000000001
Cnemaspis_chanardi	000000001
Cnemaspis_chanthaburiensis	000000001
Cnemaspis_dickersonae	100000000
Cnemaspis_flavigaster	000000001
Cnemaspis_flavolineata	000000001
Cnemaspis_gemunu	000001000
Cnemaspis_grismeri	000000001
Cnemaspis_hangus	000000001
Cnemaspis_harimau	000000001
Cnemaspis_huaseesom	000000001
Cnemaspis_kandiana	000001001
Cnemaspis_karsticola	000000001
Cnemaspis_kendallii	000000001
Cnemaspis_kumpoli	000000001
Cnemaspis_limi	000000001
Cnemaspis_mcguirei	000000001
Cnemaspis_modiglianii	000000001
Cnemaspis_monachorum	000000001
Cnemaspis_mumpuniae	000000001
Cnemaspis_narathiwatensis	000000001
Cnemaspis_neangthyi	000000001
Cnemaspis_niyomwanae	000000001
Cnemaspis_nuicamensis	000000001
Cnemaspis_omari	000000001
Cnemaspis_paripari	000000001
Cnemaspis_pemanggilensis	000000001
Cnemaspis_peninsularis	000000001
Cnemaspis_perhentianensis	000000001
Cnemaspis_podihuna	000001000
Cnemaspis_pseudomcguirei	000000001
Cnemaspis_psychedelica	000000001
Cnemaspis_roticanai	000000001
Cnemaspis_scalpensis	000001000
Cnemaspis_selamatkanmerapoh	000000001
Cnemaspis_shahruli	000000001
Cnemaspis_siamensis	000000001
Cnemaspis_stongensis	000000001
Cnemaspis_sundainsula	000000001
Cnemaspis_temiah	000000001
Cnemaspis_tropidogaster	000001000
Cnemaspis_tucdupensis	000000001
Cnemaspis_uzungwae	100000000
Cnemidophorus_arenivagus	000000010
Cnemidophorus_gramivagus	000000010
Cnemidophorus_lemniscatus	000100110
Cnemidophorus_ruatanus	000100100
Cnemidophorus_vanzoi	000100000
Coelognathus_erythrurus	000000001
Coelognathus_flavolineatus	000000001
Coelognathus_helena	000011000
Coelognathus_radiatus	000011001
Coelognathus_subradiatus	000000001
Coeranoscincus_frontalis	001000000
Coeranoscincus_reticulatus	001000000
Coggeria_naufragus	001000000
Coleodactylus_brachystoma	000000010
Coleodactylus_meridionalis	000000010
Coleodactylus_natalensis	000000010
Coleodactylus_septentrionalis	000000010
Coleonyx_brevis	000000100
Coleonyx_elegans	000100100
Coleonyx_mitratus	000100100
Coleonyx_variegatus	000000100
Colobodactylus_dalcyanus	000000010
Colobodactylus_taunayi	000000010
Colobosaura_modesta	000000010
Colobosauroides_cearensis	000000010
Coloptychon_rhombifer	000100000
Colopus_kochii	100000000
Colopus_wahlbergii	100000000
Coluber_bilineatus	000000100
Coluber_constrictor	000000100
Coluber_flagellum	000000100
Coluber_lateralis	000000100
Coluber_schotti	000000100
Coluber_taeniatus	000000100
Coluber_zebrinus	100000000
Compsophis_albiventris	100000000
Compsophis_boulengeri	100000000
Compsophis_fatsibe	100000000
Compsophis_infralineatus	100000000
Compsophis_laphystius	100000000
Concinnia_amplus	001000000
Concinnia_brachyosoma	001000000
Concinnia_frerei	001000000
Concinnia_martini	001000000
Concinnia_queenslandiae	001000000
Concinnia_sokosoma	001000000
Concinnia_tenuis	001000000
Concinnia_tigrinus	001000000
Congolacerta_asukului	100000000
Congolacerta_vauereselli	100000000
Coniophanes_fissidens	000100110
Conolophus_marthae	000000010
Conolophus_pallidus	000000010
Conolophus_subcristatus	000000010
Conophis_lineatus	000000010
Conophis_vittatus	000000100
Conopsis_biserialis	000000100
Conopsis_nasus	000000100
Contia_longicaudae	000000100
Contia_tenuis	000000100
Contomastix_lacertoides	000000010
Copeoglossum_aurae	000100010
Copeoglossum_nigropunctatum	000100010
Cophosaurus_texanus	000000100
Cophotis_ceylanica	000001000
Cophotis_dumbara	000001000
Corallus_annulatus	000100110
Corallus_batesii	000000010
Corallus_caninus	000000010
Corallus_cookii	000100000
Corallus_cropanii	000000010
Corallus_grenadensis	000100000
Corallus_hortulanus	000100010
Corallus_ruschenbergerii	000100010
Cordylosaurus_subtessellatus	100000000
Cordylus_aridus	100000000
Cordylus_beraduccii	100000000
Cordylus_cordylus	100000000
Cordylus_imkeae	100000000
Cordylus_jonesii	100000000
Cordylus_machadoi	100000000
Cordylus_macropholis	100000000
Cordylus_marunguensis	100000000
Cordylus_mclachlani	100000000
Cordylus_meculae	100000000
Cordylus_minor	100000000
Cordylus_niger	100000000
Cordylus_oelofseni	100000000
Cordylus_rhodesianus	100000000
Cordylus_rivae	100000000
Cordylus_tropidosternum	100000000
Cordylus_ukingensis	100000000
Cordylus_vittifer	100000000
Coronella_austriaca	110010000
Coronella_girondica	100010000
Correlophus_ciliatus	001000000
Correlophus_sarasinorum	001000000
Corucia_zebrata	001000000
Coryphophylax_subcristatus	000000001
Corytophanes_cristatus	000100110
Corytophanes_percarinatus	000100100
Crenadactylus_ocellatus	001000000
Cricosaura_typica	000000100
Crisantophis_nevermanni	000100100
Crocodilurus_amazonicus	000000010
Crossobamon_orientalis	000011000
Crotalus_adamanteus	000000100
Crotalus_aquilus	000000100
Crotalus_atrox	000000100
Crotalus_basiliscus	000000100
Crotalus_catalinensis	000000100
Crotalus_cerastes	000000100
Crotalus_cerberus	000000100
Crotalus_culminatus	000000100
Crotalus_durissus	000100110
Crotalus_enyo	000000100
Crotalus_ericsmithi	000000100
Crotalus_horridus	000000100
Crotalus_intermedius	000000100
Crotalus_lannomi	000000100
Crotalus_lepidus	000000100
Crotalus_mitchellii	000000100
Crotalus_molossus	000000100
Crotalus_oreganus	000000100
Crotalus_polystictus	000000100
Crotalus_pricei	000000100
Crotalus_pusillus	000000100
Crotalus_ravus	000000100
Crotalus_ruber	000000100
Crotalus_scutulatus	000000100
Crotalus_simus	000100100
Crotalus_stejnegeri	000000100
Crotalus_tancitarensis	000000100
Crotalus_tigris	000000100
Crotalus_totonacus	000000100
Crotalus_transversus	000000100
Crotalus_triseriatus	000000100
Crotalus_tzabcan	000000100
Crotalus_viridis	000000100
Crotalus_willardi	000000100
Crotaphopeltis_hotamboeia	100000000
Crotaphopeltis_tornieri	100000000
Crotaphytus_antiquus	000000100
Crotaphytus_bicinctores	000000100
Crotaphytus_collaris	000000100
Crotaphytus_dickersonae	000000100
Crotaphytus_grismeri	000000100
Crotaphytus_insularis	000000100
Crotaphytus_nebrius	000000100
Crotaphytus_reticulatus	000000100
Crotaphytus_vestigium	000000100
Cryophis_hallbergi	000000100
Cryptactites_peringueyi	100000000
Cryptoblepharus_africanus	100000000
Cryptoblepharus_ater	100000000
Cryptoblepharus_boutonii	100000000
Cryptoblepharus_cognatus	100000000
Cryptoblepharus_gloriosus	100000000
Cryptoblepharus_keiensis	000000001
Cryptoblepharus_nigropunctatus	001000000
Cryptoblepharus_novocaledonicus	001000000
Cryptoblepharus_voeltzkowi	100000000
Cryptophis_nigrescens	001000000
Ctenoblepharys_adspersa	000000010
Ctenophorus_adelaidensis	001000000
Ctenophorus_butlerorum	001000000
Ctenophorus_caudicinctus	001000000
Ctenophorus_chapmani	001000000
Ctenophorus_clayi	001000000
Ctenophorus_cristatus	001000000
Ctenophorus_decresii	001000000
Ctenophorus_femoralis	001000000
Ctenophorus_fionni	001000000
Ctenophorus_fordi	001000000
Ctenophorus_gibba	001000000
Ctenophorus_isolepis	001000000
Ctenophorus_maculatus	001000000
Ctenophorus_maculosus	001000000
Ctenophorus_mckenziei	001000000
Ctenophorus_nuchalis	001000000
Ctenophorus_ornatus	001000000
Ctenophorus_parviceps	001000000
Ctenophorus_pictus	001000000
Ctenophorus_reticulatus	001000000
Ctenophorus_rufescens	001000000
Ctenophorus_salinarum	001000000
Ctenophorus_scutulatus	001000000
Ctenophorus_tjantjalka	001000000
Ctenophorus_vadnappa	001000000
Ctenosaura_acanthura	000000100
Ctenosaura_bakeri	000100000
Ctenosaura_flavidorsalis	000100000
Ctenosaura_hemilopha	000000100
Ctenosaura_melanosterna	000100000
Ctenosaura_oaxacana	000000100
Ctenosaura_oedirhina	000100000
Ctenosaura_palearis	000100100
Ctenosaura_pectinata	000000100
Ctenosaura_quinquecarinata	000100000
Ctenosaura_similis	000100110
Ctenotus_agrestis	001000000
Ctenotus_alacer	001000000
Ctenotus_alleni	001000000
Ctenotus_allotropis	001000000
Ctenotus_angusticeps	001000000
Ctenotus_arcanus	001000000
Ctenotus_ariadnae	001000000
Ctenotus_arnhemensis	001000000
Ctenotus_astarte	001000000
Ctenotus_atlas	001000000
Ctenotus_australis	001000000
Ctenotus_brooksi	001000000
Ctenotus_burbidgei	001000000
Ctenotus_calurus	001000000
Ctenotus_catenifer	001000000
Ctenotus_coggeri	001000000
Ctenotus_colletti	001000000
Ctenotus_decaneurus	001000000
Ctenotus_delli	001000000
Ctenotus_dux	001000000
Ctenotus_ehmanni	001000000
Ctenotus_essingtonii	001000000
Ctenotus_eurydice	001000000
Ctenotus_eutaenius	001000000
Ctenotus_fallens	001000000
Ctenotus_gagudju	001000000
Ctenotus_gemmula	001000000
Ctenotus_grandis	001000000
Ctenotus_greeri	001000000
Ctenotus_hanloni	001000000
Ctenotus_hebetior	001000000
Ctenotus_helenae	001000000
Ctenotus_hilli	001000000
Ctenotus_iapetus	001000000
Ctenotus_impar	001000000
Ctenotus_ingrami	001000000
Ctenotus_inornatus	001000000
Ctenotus_joanae	001000000
Ctenotus_kurnbudj	001000000
Ctenotus_labillardieri	001000000
Ctenotus_lancelini	001000000
Ctenotus_lateralis	001000000
Ctenotus_leae	001000000
Ctenotus_leonhardii	001000000
Ctenotus_maryani	001000000
Ctenotus_mesotes	001000000
Ctenotus_militaris	001000000
Ctenotus_mimetes	001000000
Ctenotus_nasutus	001000000
Ctenotus_nigrilineatus	001000000
Ctenotus_nullum	001000000
Ctenotus_olympicus	001000000
Ctenotus_orientalis	001000000
Ctenotus_pantherinus	001000000
Ctenotus_piankai	001000000
Ctenotus_pulchellus	001000000
Ctenotus_quattuordecimlineatus	001000000
Ctenotus_quinkan	001000000
Ctenotus_rawlinsoni	001000000
Ctenotus_regius	001000000
Ctenotus_rimacolus	001000000
Ctenotus_robustus	001000000
Ctenotus_rosarium	001000000
Ctenotus_rubicundus	001000000
Ctenotus_rufescens	001000000
Ctenotus_rutilans	001000000
Ctenotus_saxatilis	001000000
Ctenotus_schevilli	001000000
Ctenotus_schomburgkii	001000000
Ctenotus_septenarius	001000000
Ctenotus_serventyi	001000000
Ctenotus_severus	001000000
Ctenotus_spaldingi	001000000
Ctenotus_storri	001000000
Ctenotus_strauchii	001000000
Ctenotus_striaticeps	001000000
Ctenotus_stuarti	001000000
Ctenotus_taeniolatus	001000000
Ctenotus_tanamiensis	001000000
Ctenotus_tantillus	001000000
Ctenotus_terrareginae	001000000
Ctenotus_uber	001000000
Ctenotus_vertebralis	001000000
Ctenotus_xenopleura	001000000
Ctenotus_youngsoni	001000000
Ctenotus_zastictus	001000000
Ctenotus_zebrilla	001000000
Cubophis_cantherigerus	000100100
Cubophis_caymanus	000000100
Cubophis_fuscicauda	000000100
Cubophis_ruttyi	000000100
Cubophis_vudii	000000100
Cyclodomorphus_branchialis	001000000
Cyclodomorphus_casuarinae	001000000
Cyclodomorphus_michaeli	001000000
Cyclodomorphus_praealtus	001000000
Cyclophiops_major	000010001
Cyclophiops_multicinctus	000010001
Cyclura_carinata	000000100
Cyclura_collei	000100000
Cyclura_cornuta	000100000
Cyclura_cychlura	000000100
Cyclura_nubila	000100100
Cyclura_pinguis	000100000
Cyclura_ricordi	000100000
Cyclura_rileyi	000000100
Cylindrophis_maculatus	000001000
Cylindrophis_ruffus	001011001
Cynisca_kraussi	100000000
Cynisca_leucura	100000000
Cyrtodactylus_adorus	001000000
Cyrtodactylus_agusanensis	000000001
Cyrtodactylus_albofasciatus	000001000
Cyrtodactylus_angularis	000010001
Cyrtodactylus_annandalei	000011000
Cyrtodactylus_annulatus	000000001
Cyrtodactylus_arcanus	001000000
Cyrtodactylus_astrum	000000001
Cyrtodactylus_aurensis	000000001
Cyrtodactylus_australotitiwangsaensis	000000001
Cyrtodactylus_ayeyarwadyensis	000001000
Cyrtodactylus_badenensis	000000001
Cyrtodactylus_baluensis	000000001
Cyrtodactylus_batucolus	000000001
Cyrtodactylus_bidoupimontis	000000001
Cyrtodactylus_bintangrendah	000000001
Cyrtodactylus_bintangtinggi	000000001
Cyrtodactylus_boreoclivus	001000000
Cyrtodactylus_brevidactylus	000011000
Cyrtodactylus_bugiamapensis	000000001
Cyrtodactylus_caovansungi	000000001
Cyrtodactylus_capreoloides	001000000
Cyrtodactylus_cattienensis	000000001
Cyrtodactylus_cavernicolus	000000001
Cyrtodactylus_chanhomeae	000000001
Cyrtodactylus_chrysopylos	000010000
Cyrtodactylus_collegalensis	000001000
Cyrtodactylus_consobrinus	000000001
Cyrtodactylus_cryptus	000010000
Cyrtodactylus_cucdongensis	000000001
Cyrtodactylus_darmandvillei	000000001
Cyrtodactylus_dati	000000001
Cyrtodactylus_deccanensis	000001000
Cyrtodactylus_eisenmanae	000000001
Cyrtodactylus_elok	000000001
Cyrtodactylus_epiroticus	001000000
Cyrtodactylus_fasciolatum	000011000
Cyrtodactylus_feae	000011000
Cyrtodactylus_gansi	000001000
Cyrtodactylus_grismeri	000000001
Cyrtodactylus_gubernatoris	000011000
Cyrtodactylus_hontreensis	000000001
Cyrtodactylus_hoskini	001000000
Cyrtodactylus_huynhi	000000001
Cyrtodactylus_interdigitalis	000010001
Cyrtodactylus_intermedius	000000001
Cyrtodactylus_irregularis	000010001
Cyrtodactylus_jambangan	000000001
Cyrtodactylus_jarujini	000010000
Cyrtodactylus_jelawangensis	000000001
Cyrtodactylus_jellesmae	000000001
Cyrtodactylus_jeyporensis	000001000
Cyrtodactylus_khasiensis	000011000
Cyrtodactylus_kimberleyensis	001000000
Cyrtodactylus_kingsadai	000000001
Cyrtodactylus_klugei	001000000
Cyrtodactylus_langkawiensis	000000001
Cyrtodactylus_lomyenensis	000000001
Cyrtodactylus_loriae	001000000
Cyrtodactylus_louisiadensis	001000000
Cyrtodactylus_macrotuberculatus	000000001
Cyrtodactylus_majulah	000000001
Cyrtodactylus_malayanus	000000001
Cyrtodactylus_marmoratus	001000001
Cyrtodactylus_mcdonaldi	001000000
Cyrtodactylus_medioclivus	001000000
Cyrtodactylus_mimikanus	001000000
Cyrtodactylus_nebulosus	000001000
Cyrtodactylus_nigriocularis	000000001
Cyrtodactylus_novaeguineae	001000000
Cyrtodactylus_oldhami	000011001
Cyrtodactylus_pageli	000010000
Cyrtodactylus_pantiensis	000000001
Cyrtodactylus_papuensis	001000000
Cyrtodactylus_paradoxus	000000001
Cyrtodactylus_payacola	000000001
Cyrtodactylus_peguensis	000011001
Cyrtodactylus_philippinicus	000000001
Cyrtodactylus_phongnhakebangensis	000000001
Cyrtodactylus_pronarus	001000000
Cyrtodactylus_pseudoquadrivirgatus	000000001
Cyrtodactylus_pubisulcus	000000001
Cyrtodactylus_pulchellus	000000001
Cyrtodactylus_quadrivirgatus	000000001
Cyrtodactylus_redimiculus	000000001
Cyrtodactylus_robustus	001000000
Cyrtodactylus_roesleri	000010001
Cyrtodactylus_rubidus	000000001
Cyrtodactylus_russelli	000011000
Cyrtodactylus_sadleiri	001000000
Cyrtodactylus_salomonensis	001000000
Cyrtodactylus_semenanjungensis	001000001
Cyrtodactylus_seribuatensis	000000001
Cyrtodactylus_sermowaiensis	001000000
Cyrtodactylus_sharkari	000000001
Cyrtodactylus_slowinskii	000011000
Cyrtodactylus_sworderi	000000001
Cyrtodactylus_takouensis	000000001
Cyrtodactylus_tautbatorum	000000001
Cyrtodactylus_tebuensis	000000001
Cyrtodactylus_teyniei	000010000
Cyrtodactylus_tibetanus	000010000
Cyrtodactylus_tigroides	000010001
Cyrtodactylus_timur	000000001
Cyrtodactylus_tiomanensis	000000001
Cyrtodactylus_triedrus	000001000
Cyrtodactylus_trilatofasciatus	000000001
Cyrtodactylus_tripartitus	001000000
Cyrtodactylus_tuberculatus	001000000
Cyrtodactylus_vilaphongi	000010000
Cyrtodactylus_wayakonei	000010000
Cyrtodactylus_yangbayensis	000000001
Cyrtodactylus_yoshii	000000001
Cyrtodactylus_ziegleri	000000001
Cyrtodactylus_zugi	001000000
Cyrtopodion_agamuroides	010010000
Cyrtopodion_aravallensis	000001000
Cyrtopodion_battalense	000010000
Cyrtopodion_gastrophole	010010000
Cyrtopodion_himalayanum	000011000
Cyrtopodion_kachhense	000011000
Cyrtopodion_kohsulaimanai	000011000
Cyrtopodion_lawderanum	000011000
Cyrtopodion_mansarulus	000011000
Cyrtopodion_rohtasfortai	000011000
Cyrtopodion_scabrum	110011000
Cyrtopodion_sistanense	000010000
Daboia_deserti	100000000
Daboia_mauritanica	100010000
Daboia_palaestinae	110000000
Daboia_russelii	000011000
Dactylocnemis_pacificus	001000000
Dalmatolacerta_oxycephala	000010000
Dalophia_ellenbergeri	100000000
Dalophia_pistillum	100000000
Darevskia_alpina	000010000
Darevskia_armeniaca	000010000
Darevskia_bendimahiensis	000010000
Darevskia_brauneri	000010000
Darevskia_caspica	000010000
Darevskia_caucasica	000010000
Darevskia_chlorogaster	000010000
Darevskia_clarkorum	000010000
Darevskia_daghestanica	000010000
Darevskia_defilippii	000010000
Darevskia_derjugini	000010000
Darevskia_kamii	000010000
Darevskia_kopetdaghica	000010000
Darevskia_lindholmi	000010000
Darevskia_mixta	000010000
Darevskia_parvula	000010000
Darevskia_portschinskii	000010000
Darevskia_praticola	000010000
Darevskia_raddei	010010000
Darevskia_rostombekovi	000010000
Darevskia_rudis	000010000
Darevskia_sapphirina	000010000
Darevskia_saxicola	000010000
Darevskia_schaekeli	000010000
Darevskia_steineri	000010000
Darevskia_unisexualis	000010000
Darevskia_valentini	010010000
Dasia_grisea	000000001
Dasia_haliana	000001000
Dasia_johnsinghi	000001000
Dasia_olivacea	000010001
Dasia_subcaeruleum	000001000
Dasia_vittata	000000001
Dasypeltis_atra	100000000
Dasypeltis_confusa	100000000
Dasypeltis_fasciata	100000000
Dasypeltis_gansi	100000000
Dasypeltis_latericia	100000000
Dasypeltis_sahelensis	100000000
Dasypeltis_scabra	110000000
Deinagkistrodon_acutus	000010000
Delma_australis	001000000
Delma_borea	001000000
Delma_butleri	001000000
Delma_concinna	001000000
Delma_fraseri	001000000
Delma_grayii	001000000
Delma_haroldi	001000000
Delma_impar	001000000
Delma_inornata	001000000
Delma_labialis	001000000
Delma_mitella	001000000
Delma_molleri	001000000
Delma_nasuta	001000000
Delma_pax	001000000
Delma_petersoni	001000000
Delma_tincta	001000000
Delma_torquata	001000000
Demansia_papuensis	001000000
Demansia_psammophis	001000000
Demansia_vestigiata	001000000
Dendrelaphis_bifrenalis	000001000
Dendrelaphis_caudolineatus	000000001
Dendrelaphis_caudolineolatus	000001000
Dendrelaphis_pictus	000011001
Dendrelaphis_schokari	000001000
Dendrelaphis_tristis	000011000
Dendroaspis_angusticeps	100000000
Dendroaspis_polylepis	110000000
Dendrophidion_dendrophis	000100010
Dendrophidion_percarinatum	000100010
Denisonia_devisi	001000000
Diadophis_punctatus	000000100
Diaphorolepis_wagneri	000100010
Dibamus_bourreti	000010000
Dibamus_celebensis	000000001
Dibamus_greeri	000000001
Dibamus_montanus	000000001
Dibamus_novaeguineae	001000001
Dibamus_seramensis	000000001
Dibamus_tiomanensis	000000001
Dicrodon_guttulatum	000000010
Dierogekko_inexpectatus	001000000
Dierogekko_insularis	001000000
Dierogekko_kaalaensis	001000000
Dierogekko_koniambo	001000000
Dierogekko_nehoueensis	001000000
Dierogekko_poumensis	001000000
Dierogekko_thomaswhitei	001000000
Dierogekko_validiclavis	001000000
Dieurostus_dussumieri	000001000
Dinarolacerta_montenegrina	000010000
Dinarolacerta_mosorensis	000010000
Diplodactylus_capensis	001000000
Diplodactylus_conspicillatus	001000000
Diplodactylus_fulleri	001000000
Diplodactylus_galaxias	001000000
Diplodactylus_galeatus	001000000
Diplodactylus_granariensis	001000000
Diplodactylus_klugei	001000000
Diplodactylus_mitchelli	001000000
Diplodactylus_nebulosus	001000000
Diplodactylus_ornatus	001000000
Diplodactylus_polyophthalmus	001000000
Diplodactylus_pulcher	001000000
Diplodactylus_savagei	001000000
Diplodactylus_tessellatus	001000000
Diplodactylus_vittatus	001000000
Diploglossus_bilobatus	000100000
Diploglossus_pleii	000100000
Diplolaemus_darwinii	000000010
Diplometopon_zarudnyi	010010000
Diporiphora_albilabris	001000000
Diporiphora_amphiboluroides	001000000
Diporiphora_arnhemica	001000000
Diporiphora_australis	001000000
Diporiphora_bennettii	001000000
Diporiphora_bilineata	001000000
Diporiphora_lalliae	001000000
Diporiphora_linga	001000000
Diporiphora_magna	001000000
Diporiphora_nobbi	001000000
Diporiphora_phaeospinosa	001000000
Diporiphora_pindan	001000000
Diporiphora_reginae	001000000
Diporiphora_superba	001000000
Diporiphora_valens	001000000
Diporiphora_winneckei	001000000
Dipsadoboa_shrevei	100000000
Dipsadoboa_unicolor	100000000
Dipsas_albifrons	000000010
Dipsas_articulata	000100000
Dipsas_catesbyi	000000010
Dipsas_indica	000000010
Dipsas_pratti	000000010
Dipsas_variegata	000100010
Dipsina_multimaculata	100000000
Dipsosaurus_dorsalis	000000100
Dispholidus_typus	110000000
Ditypophis_vivax	100000000
Dixonius_aaronbaueri	000010001
Dixonius_melanostictus	000000001
Dixonius_siamensis	000010001
Dixonius_vietnamensis	000000001
Dolichophis_caspius	000010000
Dolichophis_jugularis	110010000
Dolichophis_schmidti	110010000
Dopasia_gracilis	000011001
Dopasia_harti	000010000
Dracaena_guianensis	000000010
Draco_beccarii	000000001
Draco_biaro	000000001
Draco_bimaculatus	000000001
Draco_blanfordii	000011001
Draco_boschmai	000000001
Draco_bourouniensis	000000001
Draco_caerulhians	000000001
Draco_cornutus	000000001
Draco_cristatellus	000000001
Draco_cyanopterus	000000001
Draco_dussumieri	000001000
Draco_fimbriatus	000000001
Draco_formosus	000000001
Draco_guentheri	000000001
Draco_haematopogon	000010001
Draco_indochinensis	000000001
Draco_lineatus	000000001
Draco_maculatus	000011001
Draco_maximus	000000001
Draco_melanopogon	000000001
Draco_mindanensis	000000001
Draco_obscurus	000000001
Draco_ornatus	000000001
Draco_palawanensis	000000001
Draco_quadrasi	000000001
Draco_quinquefasciatus	000000001
Draco_reticulatus	000000001
Draco_rhytisma	000000001
Draco_spilonotus	000000001
Draco_spilopterus	000000001
Draco_sumatranus	000010001
Draco_taeniopterus	000010001
Draco_timorensis	000000001
Draco_volans	000000001
Drepanoides_anomalus	000000010
Dromicodryas_bernieri	100000000
Dromicodryas_quadrilineatus	100000000
Dryadosaura_nordestina	000000010
Drymarchon_corais	000100110
Drymarchon_couperi	000000100
Drymobius_margaritiferus	000100110
Drymobius_rhombifer	000100010
Drymoluber_brazili	000000010
Drymoluber_dichrous	000000010
Dryocalamus_nympha	000001000
Drysdalia_coronoides	001000000
Drysdalia_mastersii	001000000
Drysdalia_rhodogaster	001000000
Duberria_lutrix	110000000
Duberria_variegata	100000000
Ebenavia_inunguis	100000000
Echinanthera_melanostigma	000000010
Echinanthera_undulata	000000010
Echiopsis_curta	001000000
Echis_borkini	010000000
Echis_carinatus	010011000
Echis_coloratus	110000000
Echis_jogeri	100000000
Echis_khosatzkii	010000000
Echis_leucogaster	100000000
Echis_ocellatus	100000000
Echis_omanensis	010000000
Echis_pyramidum	110000000
Ecpleopus_gaudichaudii	000000010
Egernia_cunninghami	001000000
Egernia_cygnitos	001000000
Egernia_depressa	001000000
Egernia_eos	001000000
Egernia_epsisolus	001000000
Egernia_hosmeri	001000000
Egernia_kingii	001000000
Egernia_napoleonis	001000000
Egernia_richardi	001000000
Egernia_saxatilis	001000000
Egernia_stokesii	001000000
Egernia_striolata	001000000
Eirenis_aurolineatus	000010000
Eirenis_barani	110010000
Eirenis_collaris	010010000
Eirenis_coronelloides	110010000
Eirenis_decemlineatus	110010000
Eirenis_eiselti	110010000
Eirenis_hakkariensis	000010000
Eirenis_levantinus	110010000
Eirenis_lineomaculatus	110010000
Eirenis_medus	010010000
Eirenis_modestus	010010000
Eirenis_persicus	010011000
Eirenis_punctatolineatus	010010000
Eirenis_rothii	110010000
Elaphe_anomala	000010000
Elaphe_bimaculata	000010000
Elaphe_carinata	000010000
Elaphe_climacophora	000010000
Elaphe_davidi	000010000
Elaphe_dione	000010000
Elaphe_quadrivirgata	000010000
Elaphe_quatuorlineata	000010000
Elaphe_sauromates	110010000
Elaphe_schrenckii	000010000
Elaphe_zoigeensis	000010000
Elapognathus_coronatus	001000000
Elapomorphus_quinquelineatus	000000010
Elapotinus_picteti	100000000
Elapsoidea_nigra	100000000
Elapsoidea_semiannulata	100000000
Elapsoidea_sundevallii	100000000
Elasmodactylus_tetensis	100000000
Elasmodactylus_tuberculosus	100000000
Elgaria_coerulea	000000100
Elgaria_kingii	000000100
Elgaria_multicarinata	000000100
Elgaria_panamintina	000000100
Elgaria_paucicarinata	000000100
Emoia_atrocostata	001000000
Emoia_caeruleocauda	001010001
Emoia_concolor	001000000
Emoia_cyanogaster	001000000
Emoia_cyanura	001000001
Emoia_impar	001000000
Emoia_isolata	001000000
Emoia_jakati	001000001
[truncated: 3,417 more rows]
